# Supplementary material for: CuBr-mediated synthesis of 1,4-naphthoquinones via ring expansion of 2-aryl-1,3-indandiones
Source: Royal Society of Chemistry journal article supplement (doi:10.1039/d3cc03753c), 2023-01-01

**(96 pages)**

**Supporting Information For**

**CuBr-Mediated Synthesis of 1,4-Naphthoquinones via Ring Expansion of  
2-Aryl-1,3-indandiones**

Xu Zhang,\* Di Wang, Mengfan Chang, Wanya Wang, Zhi Shen, and Xuefeng Xu

College of Chemistry and Pharmaceutical Engineering, Nanyang Normal University, Nanyang 473061,  
China

e-mail: [zhangxuedu@126.com](mailto:zhangxuedu@126.com)

**Table of Contents**

|                                                                                                                                  |       |
|----------------------------------------------------------------------------------------------------------------------------------|-------|
| General methods and materials.....                                                                                               | 2     |
| General Catalytic Procedure for CuBr-Mediated Synthesis of 1,4-Naphthoquinones via Ring Expansion of 2-Aryl-1,3-indandiones..... | 3     |
| Procedure Gram-scale for the Synthesis of <b>3a</b> .....                                                                        | 4     |
| Procedure Gram-scale for the Synthesis of <b>4a</b> .....                                                                        | 5     |
| Control experiments.....                                                                                                         | 6-13  |
| X-Ray Crystallographic Data.....                                                                                                 | 14    |
| Characterization data for the products.....                                                                                      | 15-36 |
| Copies of <sup>1</sup> H and <sup>13</sup> C NMR spectra of products.....                                                        | 37-96 |

## General Methods and Materials

CuBr, CuBr<sub>2</sub>, CuI, Cu(OTf)<sub>2</sub>, CuOTf, CuCl<sub>2</sub>, CuBr·SMe<sub>2</sub>, and Cu(OAc)<sub>2</sub> were purchased from Energy Chemical and used without further purification. Other chemicals were purchased from commercial suppliers, further dried and purified if necessary. The water used was re-distilled and ion-free. <sup>1</sup>H and <sup>13</sup>C NMR spectra were achieved on a Bruker AVANCE 400 MHz spectrometer (<sup>1</sup>H 400 MHz; <sup>13</sup>C 100 MHz) in CDCl<sub>3</sub>. Abbreviations for data quoted are *s*-singlet; *brs*-broad singlet; *d*-doublet; *t*-triplet; *dd*-doublet of doublets; m-multiplet. High-resolution mass spectra were measured on a Waters Micromass GCT facility. Thin-layer chromatographies were done on pre-coated silica gel 60F254 plates (Merck). Silica gel 60H (200-300 mesh) manufactured by Qingdao Haiyang Chemical Group Co. (China) was used for general chromatography.

## General Catalytic Procedure for CuBr-Mediated Synthesis of 1,4-Naphthoquinones via Ring Expansion of 2-Aryl-1,3-indandiones

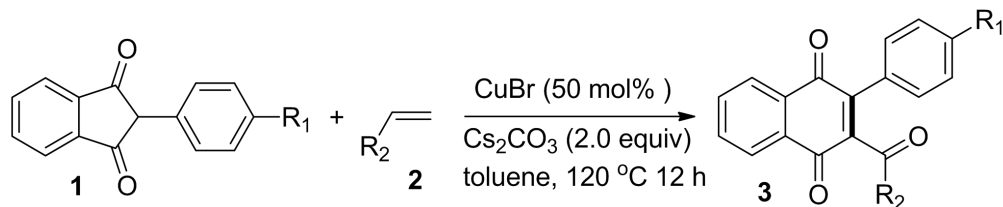

A reaction flask (25 mL) was charged with 2-aryl-1,3-indandione **1** (0.2 mmol, 1.0 equiv), alkenes **2** (0.3 mmol, 1.5 equiv), CuBr (14.3 mg, 50 mol%), Cs<sub>2</sub>CO<sub>3</sub> (0.4 mmol, 130.3 mg, 2.0 equiv), then the toluene (2 mL) was added. The mixture was stirred at 120 °C for 12 hours under an atmosphere of air. After the reaction finished, the resulted mixtures were diluted with 20 mL of dichloromethane and washed with 20 mL of H<sub>2</sub>O. The aqueous layer was extracted twice with dichloromethane (10 mL) and the combined organic phase was dried over Na<sub>2</sub>SO<sub>4</sub>. After evaporation of the solvents, the residue was purified by silica gel chromatography (hexane/AcOEt = 10 : 1 ~ 5 : 1) to yield product.

### Procedure Gram-scale for the Synthesis of 3a.

A reaction flask (250 mL) was charged with 2-phenyl-1,3-indandione **1a** (5.0 mmol, 1.0 equiv), styrene **2a** (7.5 mmol, 1.5 equiv), CuBr (357.5 mg, 50 mol%), Cs<sub>2</sub>CO<sub>3</sub> (10.0 mmol, 3258.2 mg, 2.0 equiv), then the toluene (50 mL) was added. The mixture was stirred at 120 °C for 12 hours under an atmosphere of air. After the reaction finished, the resulted mixtures were diluted with 20 mL of dichloromethane and washed with 20 mL of H<sub>2</sub>O. The aqueous layer was extracted twice with dichloromethane (10 mL) and the combined organic phase was dried over Na<sub>2</sub>SO<sub>4</sub>. After evaporation of the solvents, the residue was purified by silica gel chromatography (hexane/AcOEt = 7 : 1) to yield product 1318.2 mg.

### Procedure Gram-scale for the Synthesis of 4a.

A reaction flask (250 mL) was charged with 2-phenyl-1,3-indandione **1a** (5.0 mmol, 1.0 equiv), 4-vinyltoluene **2b** (7.5 mmol, 1.5 equiv), CuBr (357.5 mg, 50 mol%), Cs<sub>2</sub>CO<sub>3</sub> (10.0 mmol, 3258.2 mg, 2.0 equiv), then the toluene (50 mL) was added. The mixture was stirred at 120 °C for 12 hours under an atmosphere of air. After the reaction finished, the resulted mixtures were diluted with 20 mL of dichloromethane and washed with 20 mL of H<sub>2</sub>O. The aqueous layer was extracted twice with dichloromethane (10 mL) and the combined organic phase was dried over Na<sub>2</sub>SO<sub>4</sub>. After evaporation of the solvents, the residue was purified by silica gel chromatography (hexane/AcOEt = 7 : 1) to yield product 1531.2 mg.

## Control Experiments

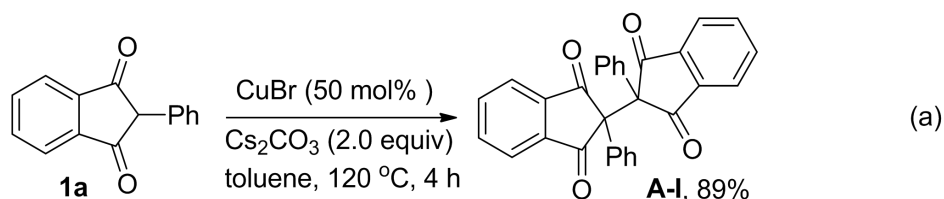

A reaction flask (25 mL) was charged with 2-phenyl-1,3-indandione **1a** (0.2 mmol, 1.0 equiv), CuBr (14.3 mg, 50 mol%), Cs<sub>2</sub>CO<sub>3</sub> (0.4 mmol, 130.3 mg, 2.0 equiv), then the toluene (2 mL) was added. The mixture was stirred at 120 °C for 4 hours under an atmosphere of air. After the reaction finished, the resulted mixtures were diluted with 20 mL of dichloromethane and washed with 20 mL of H<sub>2</sub>O. The aqueous layer was extracted twice with dichloromethane (10 mL) and the combined organic phase was dried over Na<sub>2</sub>SO<sub>4</sub>. After evaporation of the solvents, the residue was purified by silica gel chromatography (hexane/AcOEt = 3 : 1) to yield product.

2,2'-diphenyl-1H,1'H-[2,2'-biindene]-1,1',3,3'-(2H,2'H)-tetraone (**A-I**): Obtained as a pale yellow solid (84.0 mg, 76% yield), eluting with 20% EtOAc in PE (elution gradient); <sup>1</sup>H NMR (400 MHz, CDCl<sub>3</sub>) δ ppm: 7.86 - 7.89 (m, 4H), 7.71 - 7.73 (m, 4H), 7.32 - 7.35 (t, *J* = 6.8 Hz, 2H), 7.23 - 7.27 (t, *J* = 8.0 Hz, 4H), 7.18 - 7.20 (d, *J* = 8.0 Hz, 4H); <sup>13</sup>C NMR (100 MHz, CDCl<sub>3</sub>) δ ppm: 197.4, 140.90, 135.6, 130.4, 129.8, 128.7, 127.5, 123.7, 64.3; HRMS (ESI-TOF) *m/z* calcd for C<sub>30</sub>H<sub>19</sub>O<sub>4</sub> [M + H]<sup>+</sup> 443.1278, found 443.1275.



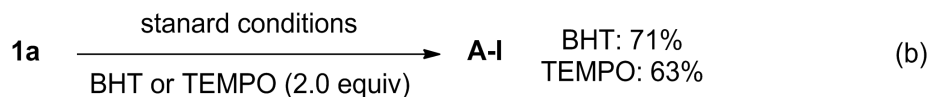

A reaction flask (25 mL) was charged with 2-phenyl-1,3-indandione **1a** (0.2 mmol, 1.0 equiv), CuBr (14.3 mg, 50 mol%), Cs<sub>2</sub>CO<sub>3</sub> (0.4 mmol, 130.3 mg, 2.0 equiv), TEMPO (0.4 mmol, 2.0 equiv) or BHT (0.4 mmol, 2.0 equiv), then the toluene (2 mL) was added. The mixture was stirred at 120 °C for 12 hours under an atmosphere of air. After the reaction finished, the resulted mixtures were diluted with 20 mL of dichloromethane and washed with 20 mL of H<sub>2</sub>O. The aqueous layer was extracted twice with dichloromethane (10 mL) and the combined organic phase was dried over Na<sub>2</sub>SO<sub>4</sub>. After evaporation of the solvents, the residue was purified by silica gel chromatography (hexane/AcOEt = 3 : 1) to yield product **A-I**.

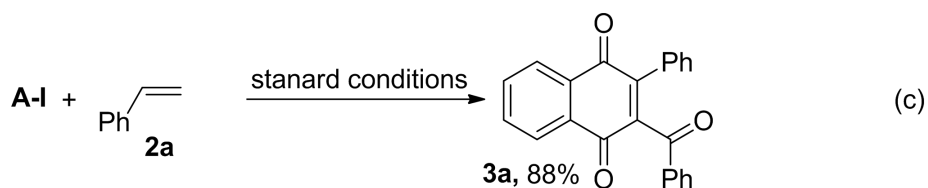

A reaction flask (25 mL) was charged with **A-I** (0.2 mmol, 1.0 equiv), styrene **2a** (0.3 mmol, 1.5 equiv), CuBr (14.3 mg, 50 mol%), Cs<sub>2</sub>CO<sub>3</sub> (0.4 mmol, 130.3 mg, 2.0 equiv), then the toluene (2 mL) was added. The mixture was stirred at 120 °C for 12 hours under an atmosphere of air. After the reaction finished, the resulted mixtures were diluted with 20 mL of dichloromethane and washed with 20 mL of H<sub>2</sub>O. The aqueous layer was extracted twice with dichloromethane (10 mL) and the combined organic phase was dried over Na<sub>2</sub>SO<sub>4</sub>. After evaporation of the solvents, the residue was purified by silica gel chromatography (hexane/AcOEt = 7 : 1) to yield product **3a**.

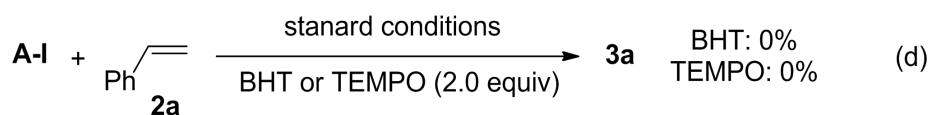

A reaction flask (25 mL) was charged with **A-I** (0.2 mmol, 1.0 equiv), styrene **2a** (0.3 mmol, 1.5 equiv), CuBr (14.3 mg, 50 mol%), Cs<sub>2</sub>CO<sub>3</sub> (0.4 mmol, 130.3 mg, 2.0 equiv), TEMPO (0.4 mmol, 2.0 equiv) or BHT (0.4 mmol, 2.0 equiv), then the toluene (2 mL) was added. The mixture was stirred at 120 °C for 12 hours under an atmosphere of air. No desired product of **3a** was detected.

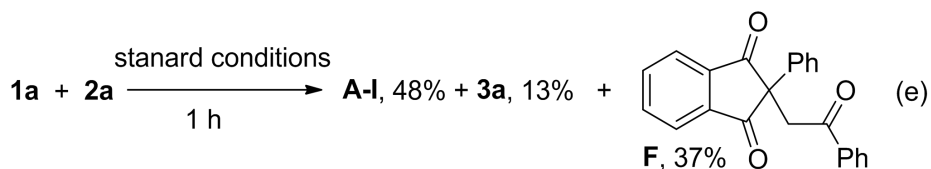

A reaction flask (25 mL) was charged with 2-aryl-1,3-indandione **1** (0.2 mmol, 1.0 equiv), alkenes **2** (0.3 mmol, 1.5 equiv), CuBr (14.3 mg, 50 mol%), Cs<sub>2</sub>CO<sub>3</sub> (0.4 mmol, 130.3 mg, 2.0 equiv), then the toluene (2 mL) was added. The mixture was stirred at 120 °C for 1 hours under an atmosphere of air. After the reaction finished, the resulted mixtures were diluted with 20 mL of dichloromethane and washed with 20 mL of H<sub>2</sub>O. The aqueous layer was extracted twice with dichloromethane (10 mL) and the combined organic phase was dried over Na<sub>2</sub>SO<sub>4</sub>. After evaporation of the solvents, the residue was purified by silica gel chromatography (hexane/AcOEt = 10 : 1 ~ 5 : 1) to yield products **A-1** in 48%, **3a** in 13%, and **F** in 37% yields, respectively.

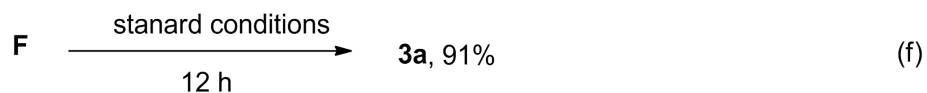

A reaction flask (25 mL) was charged with **F** (0.2 mmol, 1.0 equiv), CuBr (14.3 mg, 50 mol%), Cs<sub>2</sub>CO<sub>3</sub> (0.4 mmol, 130.3 mg, 2.0 equiv), then the toluene (2 mL) was added. The mixture was stirred at 120 °C for 12 hours under an atmosphere of air. After the reaction finished, the resulted mixtures were diluted with 20 mL of dichloromethane and washed with 20 mL of H<sub>2</sub>O. The aqueous layer was extracted twice with dichloromethane (10 mL) and the combined organic phase was dried over Na<sub>2</sub>SO<sub>4</sub>. After evaporation of the solvents, the residue was purified by silica gel chromatography (hexane/AcOEt = 7 : 1) to yield products **3a** in 91% yield.

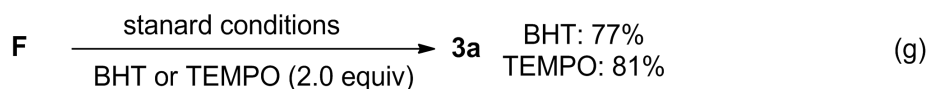

A reaction flask (25 mL) was charged with **F** (0.2 mmol, 1.0 equiv), CuBr (14.3 mg, 50 mol%), Cs<sub>2</sub>CO<sub>3</sub> (0.4 mmol, 130.3 mg, 2.0 equiv), TEMPO (0.4 mmol, 2.0 equiv) or BHT (0.4 mmol, 2.0 equiv), then the toluene (2 mL) was added. The mixture was stirred at 120 °C for 12 hours under an atmosphere of air. After the reaction finished, the resulted mixtures were diluted with 20 mL of dichloromethane and washed with 20 mL of H<sub>2</sub>O. The aqueous layer was extracted twice with dichloromethane (10 mL) and the combined organic phase was dried over Na<sub>2</sub>SO<sub>4</sub>. After evaporation of the solvents, the residue was purified by silica gel chromatography (hexane/AcOEt = 7 : 1) to yield product **3a** in 77%, and 81% yields, respectively.

## X-Ray Crystallographic Data

### Crystal structure details for Product 3e (CCDC:2285891)

|                                          |                                                   |
|------------------------------------------|---------------------------------------------------|
| Identification code                      | A                                                 |
| Empirical formula                        | C <sub>27</sub> H <sub>22</sub> O <sub>3</sub>    |
| Formula weight                           | 394.45                                            |
| Temperature/K                            | 296(2) K                                          |
| Crystal system                           | triclinic                                         |
| Space group                              | P-1                                               |
| a/Å                                      | 9.6983(19)                                        |
| b/Å                                      | 10.099(2)                                         |
| c/Å                                      | 12.581(3)                                         |
| α/°                                      | 69.766(4)                                         |
| β/°                                      | 70.291(3)                                         |
| γ/°                                      | 65.925(3)                                         |
| Volume/Å <sup>3</sup>                    | 1027.5(4)                                         |
| Z                                        | 2                                                 |
| ρ <sub>calc</sub> /g/cm <sup>3</sup>     | 1.275                                             |
| μ/mm <sup>-1</sup>                       | 0.082                                             |
| F(000)                                   | 416                                               |
| Crystal size/mm <sup>3</sup>             | 0.26 x 0.23 x 0.21                                |
| Radiation                                | MoKα (λ = 0.71073)                                |
| 2θ range for data collection/            | 1.77 to 25.00                                     |
| Index ranges                             | -11 ≤ h ≤ 9, -12 ≤ k ≤ 10, -14 ≤ l ≤ 9            |
| Reflections collected                    | 5077                                              |
| Independent reflections                  | 3570 [R(int) = 0.0216]                            |
| Data/restraints/parameters               | 3570/0/271                                        |
| Goodness-of-fit on F <sup>2</sup>        | 1.006                                             |
| Final R indexes [I ≥ 2σ (I)]             | R <sub>1</sub> = 0.0504, wR <sub>2</sub> = 0.1408 |
| Final R indexes [all data]               | R <sub>1</sub> = 0.0917, wR <sub>2</sub> = 0.1812 |
| Largest diff. peak/hole/eÅ <sup>-3</sup> | 0.227 and -0.201                                  |

## Characterization data for the products

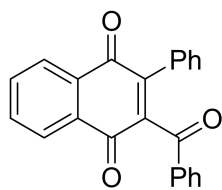

2-Benzoyl-3-phenylnaphthalene-1,4-dione (**3a**): Obtained as a yellow solid (58.1 mg, 86% yield), eluting with 10% EtOAc in PE (elution gradient);  $^1\text{H}$  NMR (400 MHz,  $\text{CDCl}_3$ )  $\delta$  8.21 - 8.23 (m, 1H), 8.13 - 8.15 (m, 1H), 7.77 - 7.85 (m, 4H), 7.47 - 7.51 (t,  $J = 7.2$  Hz, 1H), 7.33 - 7.37 (t,  $J = 7.6$  Hz, 2H), 7.26 (s, 5H);  $^{13}\text{C}$  NMR (101 MHz,  $\text{CDCl}_3$ )  $\delta$  192.9, 184.2, 183.8, 144.6, 143.9, 135.7, 134.4, 134.3, 134.0, 131.8, 131.6, 130.9, 129.7, 129.6, 129.0, 128.7, 128.0, 127.0, 126.4; HRMS (ESI-TOF)  $m/z$  calcd for  $\text{C}_{23}\text{H}_{15}\text{O}_3$   $[\text{M} + \text{H}]^+$  339.1016, found 339.1015.

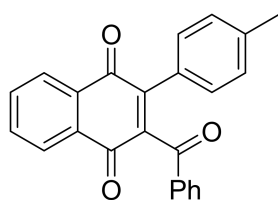

2-Benzoyl-3-(*p*-tolyl)naphthalene-1,4-dione (**3b**): Obtained as a yellow solid (62.4 mg, 91% yield), eluting with 20% EtOAc in PE (elution gradient);  $^1\text{H}$  NMR (400 MHz,  $\text{CDCl}_3$ )  $\delta$  8.20 - 8.23 (m, 1H), 8.12 - 8.14 (m, 1H), 7.78 - 7.83 (m, 4H), 7.45 - 7.52 (t,  $J = 7.2$  Hz, 1H), 7.34 - 7.38 (t,  $J = 7.6$  Hz, 2H), 7.17 - 7.19 (d,  $J = 8.0$  Hz, 2H), 7.06 - 7.08 (d,  $J = 8.0$  Hz, 2H), 2.26 (s, 3H);  $^{13}\text{C}$  NMR (101 MHz,  $\text{CDCl}_3$ )  $\delta$  193.1, 184.3, 183.8, 144.8, 143.5, 139.9, 135.9, 134.3, 134.2, 134.0, 131.9, 131.7, 129.8, 129.1, 128.8, 128.7, 128.0, 127.0, 126.4, 21.3; HRMS (ESI-TOF)  $m/z$  calcd for  $\text{C}_{24}\text{H}_{17}\text{O}_3$   $[\text{M} + \text{H}]^+$  353.1172, found 353.1173.

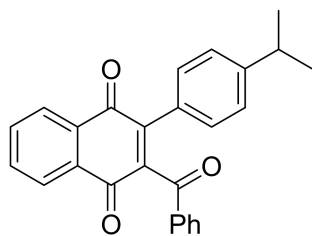

2-Benzoyl-3-(4-isopropylphenyl)naphthalene-1,4-dione (**3c**): Obtained as a yellow solid (122.2 mg, 88% yield), eluting with 20% EtOAc in PE (elution gradient);  $^1\text{H}$  NMR (400 MHz,  $\text{CDCl}_3$ )  $\delta$  8.21 - 8.23 (m, 1H), 8.12 - 8.14 (m, 1H), 7.78 - 7.85 (m, 4H), 7.48 - 7.51 (t,  $J = 7.2$  Hz, 1H), 7.34 - 7.38 (t,  $J = 7.6$  Hz,

2H), 7.18 - 7.20 (d,  $J = 8.0$  Hz, 2H), 7.10 - 7.12 (d,  $J = 8.4$  Hz, 2H), 2.76 - 2.86 (m, 1H), 1.16 (s, 3H), 1.15 (s, 3H);  $^{13}\text{C}$  NMR (101 MHz,  $\text{CDCl}_3$ )  $\delta$  193.3, 184.4, 183.8, 150.6, 144.8, 143.4, 135.9, 134.3, 134.2, 133.9, 131.9, 131.6, 129.9, 129.2, 128.6, 128.3, 127.0, 126.4, 126.2, 33.8, 23.6; HRMS (ESI-TOF)  $m/z$  calcd for  $\text{C}_{26}\text{H}_{21}\text{O}_3$  [ $\text{M} + \text{H}$ ] $^+$  381.1485, found 381.1483.

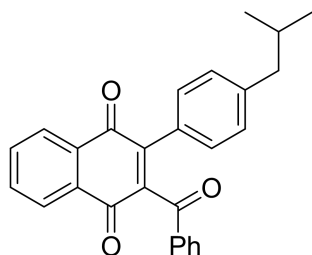

2-Benzoyl-3-(4-isobutylphenyl)naphthalene-1,4-dione (**3d**):

Obtained as a yellow solid (68.6 mg, 87% yield), eluting with 20% EtOAc in PE (elution gradient);  $^1\text{H}$  NMR (400 MHz,  $\text{CDCl}_3$ )  $\delta$  8.21 - 8.23 (m, 1H), 8.13 - 8.16 (m, 1H), 7.82 - 7.84 (m, 2H), 7.74 - 7.76 (d,  $J = 7.2$  Hz, 2H), 7.45 - 7.48 (t,  $J = 7.2$  Hz, 1H), 7.31 - 7.34 (t,  $J = 8.0$  Hz, 2H), 7.16 - 7.18 (d,  $J = 8.4$  Hz, 2H), 7.01 - 7.03 (d,  $J = 8.0$  Hz, 2H), 2.36 - 2.38 (d,  $J = 7.2$  Hz, 2H), 1.69 - 1.78 (m, 1H), 0.78 (s, 3H), 0.76 (s, 3H);  $^{13}\text{C}$  NMR (101 MHz,  $\text{CDCl}_3$ )  $\delta$  193.3, 184.4, 183.7, 144.7, 143.6, 143.4, 135.8, 134.3, 134.2, 133.8, 131.9, 131.7, 129.7, 129.0, 128.8, 128.5, 128.3, 127.0, 126.4, 45.1, 30.0, 22.2; HRMS (ESI-TOF)  $m/z$  calcd for  $\text{C}_{27}\text{H}_{23}\text{O}_3$  [ $\text{M} + \text{H}$ ] $^+$  395.1642, found 395.1644.

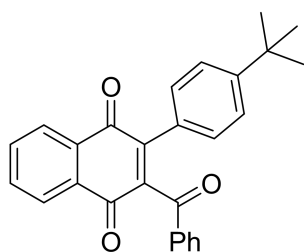

2-Benzoyl-3-(4-*tert*-butylphenyl)naphthalene-1,4-dione (**3e**):

Obtained as a yellow solid (72.5 mg, 92% yield), eluting with 20% EtOAc in PE (elution gradient);  $^1\text{H}$  NMR (400 MHz,  $\text{CDCl}_3$ )  $\delta$  8.20 - 8.23 (m, 1H), 8.11 - 8.14 (m, 1H), 7.77 - 7.82 (m, 4H), 7.46 - 7.50 (t,  $J = 7.2$  Hz, 1H), 7.33 - 7.37 (t,  $J = 7.6$  Hz, 2H), 7.26 - 7.28 (d,  $J = 8.8$  Hz, 2H), 7.19 - 7.21 (d,  $J = 8.4$  Hz, 2H), 1.22 (s, 9H);  $^{13}\text{C}$  NMR (101 MHz,  $\text{CDCl}_3$ )  $\delta$  193.2, 184.4, 183.8, 152.8, 144.8, 143.5, 136.1, 134.3,

134.2, 133.8, 131.9, 131.7, 129.6, 129.0, 128.6, 128.0, 127.0, 126.3, 125.0, 34.7, 31.0;  
HRMS (ESI-TOF)  $m/z$  calcd for  $C_{27}H_{23}O_3$   $[M + H]^+$  395.1642, found 395.1640.

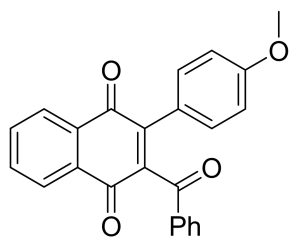

2-Benzoyl-3-(4-methoxyphenyl)naphthalene-1,4-dione (**3f**):

Obtained as a yellow solid (64.0 mg, 87% yield), eluting with 20% EtOAc in PE (elution gradient);  $^1H$  NMR (400 MHz,  $CDCl_3$ )  $\delta$  8.21 - 8.23 (m, 1H), 8.11 - 8.14 (m, 1H), 7.79 - 7.82 (m, 4H), 7.48 - 7.52 (t,  $J = 7.6$  Hz, 1H), 7.34 - 7.38 (t,  $J = 7.2$  Hz, 2H), 7.24 - 7.26 (d,  $J = 9.2$  Hz, 2H), 6.78 - 6.70 (d,  $J = 8.8$  Hz, 2H), 3.73 (s, 3H);  $^{13}C$  NMR (101 MHz,  $CDCl_3$ )  $\delta$  193.4, 184.5, 183.7, 161.0, 144.2, 142.9, 135.7, 134.3, 134.2, 134.0, 131.9, 131.7, 129.0, 128.7, 128.3, 127.0, 126.3, 123.2, 113.6, 55.2; HRMS (ESI-TOF)  $m/z$  calcd for  $C_{24}H_{17}O_4$   $[M + H]^+$  369.1121, found 369.1120.

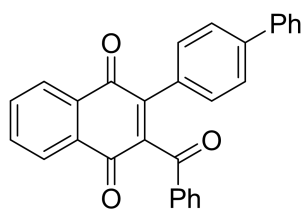

2-([1,1'-Biphenyl]-4-yl)-3-benzoylnaphthalene-1,4-dione (**3g**):

Obtained as a yellow solid (77.8 mg, 94% yield), eluting with 20% EtOAc in PE (elution gradient);  $^1H$  NMR (400 MHz,  $CDCl_3$ )  $\delta$  8.23 - 8.25 (m, 1H), 8.14 - 8.16 (m, 1H), 7.81 - 7.87 (m, 4H), 7.49 - 7.52 (m, 5H), 7.33 - 7.42 (m, 7H);  $^{13}C$  NMR (101 MHz,  $CDCl_3$ )  $\delta$  193.1, 184.2, 183.8, 144.4, 143.7, 142.3, 140.0, 135.8, 134.4, 134.3, 134.1, 131.9, 131.6, 130.3, 129.8, 129.1, 128.8, 128.8, 127.7, 127.1, 127.1, 126.7, 126.4; HRMS (ESI-TOF)  $m/z$  calcd for  $C_{29}H_{19}O_3$   $[M + H]^+$  415.1329, found 415.1327.

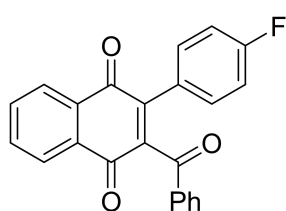

2-Benzoyl-3-(4-fluorophenyl)naphthalene-1,4-dione (**3h**):

Obtained as a yellow solid (57.7 mg, 81% yield), eluting with 15% EtOAc in PE (elution gradient);  $^1\text{H}$  NMR (400 MHz,  $\text{CDCl}_3$ )  $\delta$  8.20 - 8.22 (m, 1H), 8.12 - 8.14 (m, 1H), 7.82 - 7.86 (m, 2H), 7.77 - 7.79 (d,  $J = 7.6$  Hz, 2H), 7.50 - 7.53 (t,  $J = 7.6$  Hz, 1H), 7.35 - 7.39 (t,  $J = 7.6$  Hz, 2H), 7.25 - 7.29 (m, 2H), 6.94 - 6.98 (t,  $J = 8.4$  Hz, 2H);  $^{13}\text{C}$  NMR (101 MHz,  $\text{CDCl}_3$ )  $\delta$  192.9, 184.0, 183.6, 163.3 (d,  $J = 249.2$  Hz, 1C), 143.9, 143.5, 135.5, 134.5, 134.4, 134.2, 131.9 (d,  $J = 8.5$  Hz, 1C), 131.7, 131.5, 129.0, 128.8, 127.0, 126.8 (d,  $J = 3.4$  Hz, 1C), 126.4, 115.3 (d,  $J = 21.7$  Hz, 1C);  $^{19}\text{F}$  NMR (400 MHz,  $\text{CDCl}_3$ )  $\delta$  -110.3; HRMS (ESI-TOF)  $m/z$  calcd for  $\text{C}_{23}\text{H}_{14}\text{O}_3\text{F}$  [ $\text{M} + \text{H}$ ] $^+$  357.0922, found 357.0920.

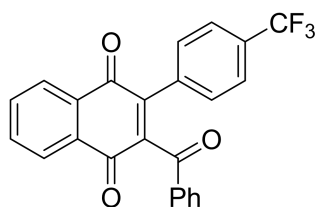

2-Benzoyl-3-(4-(trifluoromethyl)phenyl)naphthalene-1,4-dione

(**3i**): Obtained as a yellow solid (64.3 mg, 79% yield), eluting with 15% EtOAc in PE (elution gradient);  $^1\text{H}$  NMR (400 MHz,  $\text{CDCl}_3$ )  $\delta$  8.20 - 8.22 (m, 1H), 8.12 - 8.15 (m, 1H), 7.77 - 7.87 (m, 4H), 7.51 - 7.55 (m, 3H), 7.37 - 7.41 (m, 4H);  $^{13}\text{C}$  NMR (101 MHz,  $\text{CDCl}_3$ )  $\delta$  192.5, 183.6, 183.5, 144.6, 143.3, 135.5, 134.6, 134.4 (q,  $J = 3.3, 4.5$  Hz, 1C), 131.8, 131.6, 131.45, 131.3 (q,  $J = 32.4, 64.9$  Hz, 1C), 130.1, 129.0, 128.9, 127.1, 126.5, 125.0 (q,  $J = 3.6, 7.3$  Hz, 1C), 124.3 (q,  $J = 167.6, 270.9$  Hz, 1C);  $^{19}\text{F}$  NMR (400 MHz,  $\text{CDCl}_3$ )  $\delta$  -63.0; HRMS (ESI-TOF)  $m/z$  calcd for  $\text{C}_{24}\text{H}_{14}\text{O}_3\text{F}_3$  [ $\text{M} + \text{H}$ ] $^+$  407.0890, found 407.0878.

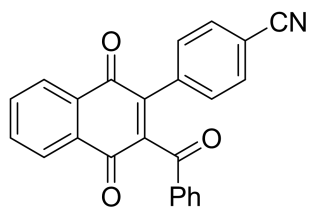

4-(3-Benzoyl-1,4-dioxo-1,4-dihydronaphthalen-2-yl)benzonitrile

(**3j**): Obtained as a yellow solid (55.2 mg, 76% yield), eluting with 20% EtOAc in PE (elution gradient);  $^1\text{H}$  NMR (400 MHz,  $\text{CDCl}_3$ )  $\delta$  8.22 - 8.23 (m, 1H), 8.14 - 8.16 (m, 1H), 7.85 - 7.87 (m, 2H), 7.75 - 7.77 (d,  $J = 7.6$  Hz, 2H), 7.53 - 7.57 (m, 3H), 7.37

- 7.41 (m, 4H);  $^{13}\text{C}$  NMR (101 MHz,  $\text{CDCl}_3$ )  $\delta$  192.2, 183.4, 183.3, 144.8, 142.8, 135.6, 135.4, 134.8, 134.7, 134.6, 131.7, 131.5, 131.5, 130.5, 129.0, 128.9, 127.2, 126.6, 118.1, 113.3; HRMS (ESI-TOF)  $m/z$  calcd for  $\text{C}_{24}\text{H}_{14}\text{NO}_3$   $[\text{M} + \text{H}]^+$  364.0968, found 364.0967.

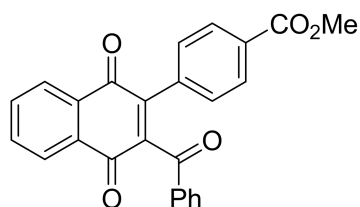

Methyl

4-(3-benzoyl-1,4-dioxo-1,4-dihydronaphthalen-2-yl)benzoate (**3k**): Obtained as a yellow solid (59.4 mg, 75% yield), eluting with 20% EtOAc in PE (elution gradient);  $^1\text{H}$  NMR (400 MHz,  $\text{CDCl}_3$ )  $\delta$  8.21 - 8.23 (m, 1H), 8.14 - 8.16 (m, 1H), 7.92 - 7.74 (d,  $J$  = 8.0 Hz, 2H), 7.82 - 7.88 (m, 2H), 7.76 - 7.78 (d,  $J$  = 7.6 Hz, 2H), 7.50 - 7.53 (t,  $J$  = 7.2 Hz, 1H), 7.33 - 7.41 (m, 4H), 3.87 (s, 3H);  $^{13}\text{C}$  NMR (101 MHz,  $\text{CDCl}_3$ )  $\delta$  192.5, 183.7, 183.6, 166.3, 144.4, 143.8, 135.6, 135.5, 134.6, 134.5, 134.3, 131.7, 131.6, 130.9, 129.8, 129.2, 129.0, 128.8, 127.1, 126.6, 52.2; HRMS (ESI-TOF)  $m/z$  calcd for  $\text{C}_{25}\text{H}_{17}\text{O}_5$   $[\text{M} + \text{H}]^+$  397.1071, found 397.1072.

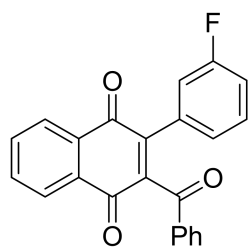

2-Benzoyl-3-(3-fluorophenyl)naphthalene-1,4-dione (**3l**): Obtained as a yellow solid (52.7 mg, 74% yield), eluting with 20% EtOAc in PE (elution gradient);  $^1\text{H}$  NMR (400 MHz,  $\text{CDCl}_3$ )  $\delta$  8.21 - 8.23 (m, 1H), 8.13 - 8.15 (m, 1H), 7.83 - 7.87 (m, 2H), 7.77 - 7.79 (d,  $J$  = 7.6 Hz, 2H), 7.50 - 7.54 (t,  $J$  = 7.6 Hz, 1H), 7.36 - 7.40 (t,  $J$  = 7.6 Hz, 2H), 7.20 - 7.24 (t,  $J$  = 6.4 Hz, 1H), 6.96 - 7.04 (m, 3H);  $^{13}\text{C}$  NMR (101 MHz,  $\text{CDCl}_3$ )  $\delta$  192.6, 183.7, 183.6, 162.0 (d,  $J$  = 246.0 Hz, 1C), 144.3, 143.3, 135.6, 134.6, 134.4, 134.3, 132.8 (d,  $J$  = 8.0 Hz, 1C), 131.7, 131.5, 129.8 (d,  $J$  = 8.3 Hz, 1C), 129.0, 128.8, 127.1, 126.5, 125.6 (d,  $J$  = 3.2 Hz, 1C), 117.0 (d,  $J$  = 22.9

Hz, 1C), 116.7 (d,  $J = 20.9$  Hz, 1C);  $^{19}\text{F}$  NMR (400 MHz,  $\text{CDCl}_3$ )  $\delta$  -112.4; HRMS (ESI-TOF)  $m/z$  calcd for  $\text{C}_{23}\text{H}_{14}\text{O}_3\text{F}$   $[\text{M} + \text{H}]^+$  357.0922, found 357.0923.

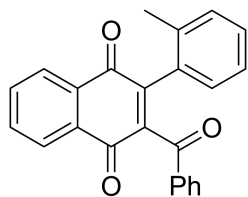

2-Benzoyl-3-(*o*-tolyl)naphthalene-1,4-dione (**3m**): Obtained as a yellow solid (54.2 mg, 77% yield), eluting with 10% EtOAc in PE (elution gradient);  $^1\text{H}$  NMR (400 MHz,  $\text{CDCl}_3$ )  $\delta$  8.16 - 8.22 (m, 2H), 7.83 - 7.85 (m, 2H), 7.23 - 7.25 (d,  $J = 7.6$  Hz, 2H), 7.50 - 7.53 (t,  $J = 7.2$  Hz, 1H), 7.35 - 7.39 (t,  $J = 7.6$  Hz, 2H), 7.15 - 7.19 (t,  $J = 7.2$  Hz, 1H), 7.09 - 7.11 (d,  $J = 7.2$  Hz, 1H), 7.00 - 7.02 (m, 2H), 2.16 (s, 3H);  $^{13}\text{C}$  NMR (101 MHz,  $\text{CDCl}_3$ )  $\delta$  192.4, 183.9, 183.6, 146.5, 145.1, 136.3, 136.0, 134.5, 134.3, 134.0, 131.9, 131.6, 130.8, 130.0, 129.4, 128.8, 128.6, 127.1, 126.5, 125.4, 20.3; HRMS (ESI-TOF)  $m/z$  calcd for  $\text{C}_{24}\text{H}_{17}\text{O}_3$   $[\text{M} + \text{H}]^+$  353.1172, found 353.1170.

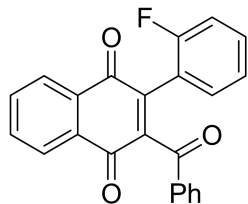

2-Benzoyl-3-(2-fluorophenyl)naphthalene-1,4-dione (**3n**): Obtained as a yellow solid (51.3 mg, 72% yield), eluting with 15% EtOAc in PE (elution gradient);  $^1\text{H}$  NMR (400 MHz,  $\text{CDCl}_3$ )  $\delta$  8.23 - 8.24 (m, 1H), 8.14 - 8.17 (m, 1H), 7.79 - 7.87 (m, 4H), 7.50 - 7.53 (t,  $J = 7.6$  Hz, 1H), 7.36 - 7.40 (t,  $J = 8.0$  Hz, 2H), 7.27 - 7.31 (m, 1H), 7.17 - 7.20 (t,  $J = 6.4$  Hz, 1H), 7.03 - 7.07 (t,  $J = 7.2$  Hz, 1H), 6.96 - 7.04 (m, 1H);  $^{13}\text{C}$  NMR (101 MHz,  $\text{CDCl}_3$ )  $\delta$  192.1, 183.3, 182.4, 159.4 (d,  $J = 247.1$  Hz, 1C), 145.3, 141.4, 135.3, 134.6, 134.3 (d,  $J = 7.3$  Hz, 1C), 131.8 (d,  $J = 8.2$  Hz, 1C), 131.7, 131.5, 131.0, 130.9, 128.9, 128.7, 127.1, 126.6, 124.0 (d,  $J = 3.4$  Hz, 1C), 119.3 (d,  $J = 16.0$  Hz, 1C), 115.4 (d,  $J = 21.1$  Hz, 1C);  $^{19}\text{F}$  NMR (400 MHz,  $\text{CDCl}_3$ )  $\delta$  -110.3; HRMS (ESI-TOF)  $m/z$  calcd for  $\text{C}_{23}\text{H}_{14}\text{O}_3\text{F}$   $[\text{M} + \text{H}]^+$  357.0922, found 357.0925.

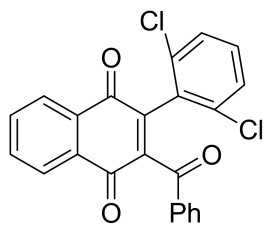

2-Benzoyl-3-(2,6-dichlorophenyl)naphthalene-1,4-dione (**3o**):

Obtained as a yellow solid (52.0 mg, 64% yield), eluting with 15% EtOAc in PE (elution gradient);  $^1\text{H}$  NMR (400 MHz,  $\text{CDCl}_3$ )  $\delta$  8.22 - 8.24 (m, 1H), 8.17 - 8.19 (m, 1H), 7.86 - 7.87 (m, 2H), 7.80 - 7.82 (d,  $J = 7.6$  Hz, 2H), 7.53 - 7.56 (t,  $J = 7.6$  Hz, 1H), 7.37 - 7.41 (t,  $J = 7.6$  Hz, 2H), 7.23 - 7.25 (d,  $J = 8.0$  Hz, 2H), 7.16 - 7.20 (t,  $J = 7.2$  Hz, 1H);  $^{13}\text{C}$  NMR (101 MHz,  $\text{CDCl}_3$ )  $\delta$  191.2, 183.5, 182.0, 145.8, 142.6, 135.2, 134.6, 134.5, 134.4, 134.2, 131.7, 131.6, 130.9, 130.1, 129.3, 128.4, 127.7, 127.2, 126.7; HRMS (ESI-TOF)  $m/z$  calcd for  $\text{C}_{23}\text{H}_{13}\text{Cl}_2\text{O}_3$   $[\text{M} + \text{H}]^+$  407.0236, found 407.0237.

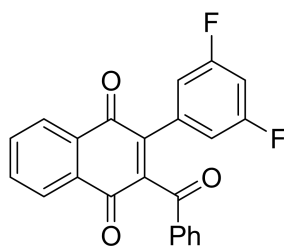

2-Benzoyl-3-(3,5-difluorophenyl)naphthalene-1,4-dione (**3p**):

Obtained as a yellow solid (47.9 mg, 65% yield), eluting with 20% EtOAc in PE (elution gradient);  $^1\text{H}$  NMR (400 MHz,  $\text{CDCl}_3$ )  $\delta$  8.21 - 8.23 (m, 1H), 8.14 - 8.16 (m, 1H), 7.82 - 7.88 (m, 2H), 7.77 - 7.79 (d,  $J = 8.0$  Hz, 2H), 7.54 - 7.57 (t,  $J = 7.6$  Hz, 1H), 7.39 - 7.43 (t,  $J = 7.2$  Hz, 2H), 6.79 - 6.81 (d,  $J = 6.4$  Hz, 2H), 6.72 - 6.76 (t,  $J = 9.2$  Hz, 1H);  $^{13}\text{C}$  NMR (101 MHz,  $\text{CDCl}_3$ )  $\delta$  192.2, 183.4, 183.3, 162.4 (d,  $J = 248.6$  Hz, 1C), 162.3 (d,  $J = 248.8$  Hz, 1C), 144.7, 142.3, 135.5, 134.7, 134.6, 134.5, 133.7 (t,  $J = 10.1$  Hz, 1C), 131.6, 131.5, 129.0, 128.9, 127.2, 126.6, 113.2 (d,  $J = 19.1$  Hz, 1C), 113.1 (d,  $J = 19.2$  Hz, 1C), 105.1 (t,  $J = 24.9$  Hz, 1C);  $^{19}\text{F}$  NMR (400 MHz,  $\text{CDCl}_3$ )  $\delta$  -108.8; HRMS (ESI-TOF)  $m/z$  calcd for  $\text{C}_{23}\text{H}_{13}\text{O}_3\text{F}_2$   $[\text{M} + \text{H}]^+$  375.0827, found 375.0824.

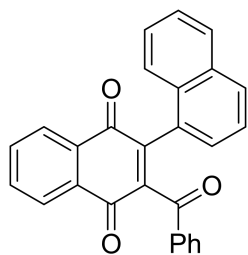

3'-Benzoyl-[1,2'-binaphthalene]-1',4'-dione (**3q**): Obtained as a yellow solid (39.6 mg, 51% yield), eluting with 20% EtOAc in PE (elution gradient);  $^1\text{H}$  NMR (400 MHz,  $\text{CDCl}_3$ )  $\delta$  8.20 - 8.22 (m, 2H), 7.84 - 7.87 (m, 2H), 7.74 - 7.76 (d,  $J = 7.6$  Hz, 2H), 7.69 - 7.71 (d,  $J = 7.6$  Hz, 2H), 7.58 - 7.61 (m, 1H), 7.22 - 7.43 (m, 7H);  $^{13}\text{C}$  NMR (101 MHz,  $\text{CDCl}_3$ )  $\delta$  192.3, 183.9, 183.7, 146.0, 145.7, 134.5, 134.4, 133.9, 133.1, 132.0, 131.8, 131.2, 130.0, 129.1, 128.9, 128.4, 127.2, 126.6, 126.4, 126.1, 125.7, 124.7; HRMS (ESI-TOF)  $m/z$  calcd for  $\text{C}_{27}\text{H}_{17}\text{O}_3$   $[\text{M} + \text{H}]^+$  389.1172, found 389.1175.

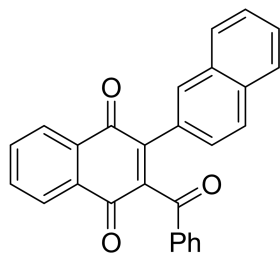

3-Benzoyl-[2,2'-binaphthalene]-1,4-dione (**3r**): Obtained as a yellow solid (60.5 mg, 78% yield), eluting with 20% EtOAc in PE (elution gradient);  $^1\text{H}$  NMR (400 MHz,  $\text{CDCl}_3$ )  $\delta$  8.24 - 8.26 (m, 1H), 8.15 - 8.18 (m, 1H), 7.71 - 7.87 (m, 8H), 7.41 - 7.49 (m, 3H), 7.30 - 7.38 (m, 3H);  $^{13}\text{C}$  NMR (101 MHz,  $\text{CDCl}_3$ )  $\delta$  193.0, 184.4, 183.8, 144.6, 144.1, 135.7, 134.5, 134.3, 134.1, 133.4, 132.5, 131.7, 131.6, 130.2, 129.0, 128.7, 128.6, 128.5, 127.7, 127.6, 127.2, 127.1, 126.6, 126.5, 126.4; HRMS (ESI-TOF)  $m/z$  calcd for  $\text{C}_{27}\text{H}_{17}\text{O}_3$   $[\text{M} + \text{H}]^+$  389.1172, found 389.1171.

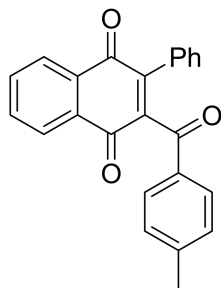

2-(4-Methylbenzoyl)-3-phenylnaphthalene-1,4-dione (**4a**): Obtained as a yellow solid (65.5 mg, 93% yield), eluting with 15% EtOAc in PE (elution

gradient);  $^1\text{H}$  NMR (400 MHz,  $\text{CDCl}_3$ )  $\delta$  8.21 - 8.23 (m, 1H), 8.12 - 8.14 (m, 1H), 7.79 - 7.85 (m, 2H), 7.67 - 7.69 (d,  $J = 8.0$  Hz, 2H), 7.26 - 7.27 (m, 5H), 7.14 - 7.16 (d,  $J = 8.0$  Hz, 2H), 2.34 (s, 3H);  $^{13}\text{C}$  NMR (101 MHz,  $\text{CDCl}_3$ )  $\delta$  192.5, 184.2, 183.8, 145.2, 144.4, 144.0, 134.4, 134.2, 133.4, 131.9, 131.6, 131.0, 129.7, 129.5, 129.4, 129.2, 128.0, 127.0, 126.4, 21.8; HRMS (ESI-TOF)  $m/z$  calcd for  $\text{C}_{24}\text{H}_{17}\text{O}_3$   $[\text{M} + \text{H}]^+$  353.1172, found 353.1174.

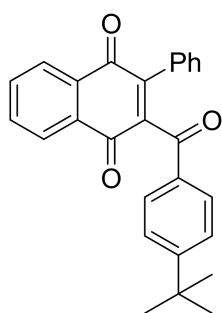

2-(4-(*Tert*-butyl)benzoyl)-3-phenylnaphthalene-1,4-dione (**4b**):

Obtained as a yellow solid (70.1 mg, 89% yield), eluting with 15% EtOAc in PE (elution gradient);  $^1\text{H}$  NMR (400 MHz,  $\text{CDCl}_3$ )  $\delta$  8.21 - 8.23 (m, 1H), 8.12 - 8.14 (m, 1H), 7.79 - 7.86 (m, 2H), 7.71 - 7.73 (d,  $J = 8.0$  Hz, 2H), 7.36 - 7.38 (d,  $J = 8.0$  Hz, 2H), 7.26 - 7.28 (m, 5H), 1.28 (s, 9H);  $^{13}\text{C}$  NMR (101 MHz,  $\text{CDCl}_3$ )  $\delta$  192.5, 184.3, 183.9, 157.9, 144.5, 144.1, 134.4, 134.2, 133.3, 131.9, 131.6, 131.0, 129.8, 129.5, 129.0, 128.0, 127.0, 126.4, 125.7, 35.2, 30.9; HRMS (ESI-TOF)  $m/z$  calcd for  $\text{C}_{27}\text{H}_{23}\text{O}_3$   $[\text{M} + \text{H}]^+$  395.1642, found 395.1643.

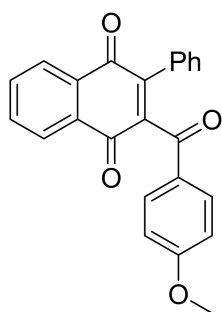

2-(4-Methoxybenzoyl)-3-phenylnaphthalene-1,4-dione (**4c**):

Obtained as a yellow solid (64.0 mg, 87% yield), eluting with 12% EtOAc in PE (elution gradient);  $^1\text{H}$  NMR (400 MHz,  $\text{CDCl}_3$ )  $\delta$  8.18 - 8.21 (m, 1H), 8.11 - 8.13 (m, 1H), 7.79 - 7.83 (m, 2H), 7.74 - 7.76 (d,  $J = 8.8$  Hz, 2H), 7.27 (s, 5H), 6.80 - 6.82 (d,  $J = 8.8$  Hz, 2H), 3.78 (s, 3H);  $^{13}\text{C}$  NMR (101 MHz,  $\text{CDCl}_3$ )  $\delta$  191.2, 184.2, 183.8, 164.2, 144.2, 144.0, 134.3, 134.2, 131.8, 131.6, 131.5, 131.1, 129.7, 129.5, 128.9, 127.9,

126.9, 126.3, 113.9, 55.4; HRMS (ESI-TOF)  $m/z$  calcd for  $C_{24}H_{17}O_4$   $[M + H]^+$  369.1121, found 369.1122.

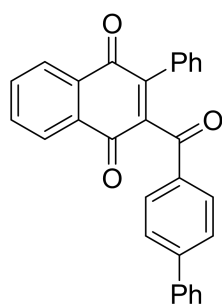

2-([1,1'-Biphenyl]-4-carbonyl)-3-phenylnaphthalene-1,4-dione (**4d**):

Obtained as a yellow solid (77.0 mg, 93% yield), eluting with 20% EtOAc in PE (elution gradient);  $^1H$  NMR (400 MHz,  $CDCl_3$ )  $\delta$  8.22 - 8.24 (m, 1H), 8.14 - 8.16 (m, 1H), 7.80 - 7.86 (m, 4H), 7.54 - 7.60 (t,  $J = 8.8$  Hz, 4H), 7.34 - 7.45 (m, 3H), 7.27 - 7.30 (m, 5H);  $^{13}C$  NMR (101 MHz,  $CDCl_3$ )  $\delta$  192.5, 184.2, 183.9, 146.7, 144.7, 143.9, 139.5, 134.5, 134.4, 134.3, 131.9, 131.6, 131.0, 129.8, 129.6, 129.0, 128.9, 128.4, 128.1, 127.4, 127.2, 127.1, 126.4; HRMS (ESI-TOF)  $m/z$  calcd for  $C_{29}H_{19}O_3$   $[M + H]^+$  415.1329, found 415.1328.

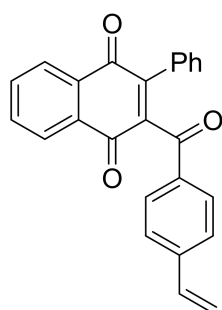

2-Phenyl-3-(4-vinylbenzoyl)naphthalene-1,4-dione (**4e**): Obtained as a yellow solid (64.1 mg, 88% yield), eluting with 20% EtOAc in PE (elution gradient);  $^1H$  NMR (400 MHz,  $CDCl_3$ )  $\delta$  8.22 - 8.23 (m, 1H), 8.14 - 8.15 (m, 1H), 7.80 - 7.86 (m, 2H), 7.73 - 7.75 (d,  $J = 7.6$  Hz, 2H), 7.36 - 7.38 (d,  $J = 8.0$  Hz, 2H), 7.25 - 7.28 (m, 5H), 6.64 - 6.71 (q,  $J = 10.8, 17.6$  Hz, 1H), 5.82 - 5.84 (d,  $J = 17.6$  Hz, 1H), 5.37 - 5.39 (d,  $J = 10.8$  Hz, 1H);  $^{13}C$  NMR (101 MHz,  $CDCl_3$ )  $\delta$  192.3, 184.2, 183.8, 144.6, 143.9, 143.0, 135.8, 135.0, 134.4, 134.3, 131.9, 131.7, 131.0, 129.8, 129.6, 129.5, 128.1, 127.1, 126.5, 117.4; HRMS (ESI-TOF)  $m/z$  calcd for  $C_{25}H_{17}O_3$   $[M + H]^+$  365.1172, found 365.1170.

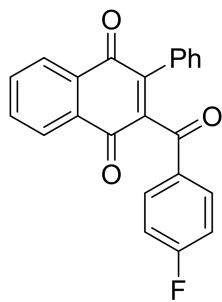

2-(4-Fluorobenzoyl)-3-phenylnaphthalene-1,4-dione (**4f**): Obtained as a yellow solid (59.1 mg, 83% yield), eluting with 20% EtOAc in PE (elution gradient);  $^1\text{H}$  NMR (400 MHz,  $\text{CDCl}_3$ )  $\delta$  8.21 - 8.23 (m, 1H), 8.13 - 8.15 (m, 1H), 7.78 - 7.86 (m, 4H), 7.26 - 7.39 (m, 5H), 7.00 - 7.04 (t,  $J = 8.0$  Hz, 2H);  $^{13}\text{C}$  NMR (101 MHz,  $\text{CDCl}_3$ )  $\delta$  191.3, 184.1, 183.7, 166.1 (d,  $J = 255.4$  Hz, 1C), 144.7, 143.5, 134.5, 134.3, 132.3 (d,  $J = 2.9$  Hz, 1C), 131.8 (d,  $J = 5.0$  Hz, 1C), 131.7, 131.6, 130.9, 129.72, 129.71, 128.1, 127.1, 126.4, 116.0 (d,  $J = 22.2$  Hz, 1C);  $^{19}\text{F}$  NMR (400 MHz,  $\text{CDCl}_3$ )  $\delta$  -102.8; HRMS (ESI-TOF)  $m/z$  calcd for  $\text{C}_{23}\text{H}_{14}\text{O}_3\text{F}$   $[\text{M} + \text{H}]^+$  357.0922, found 357.0920.

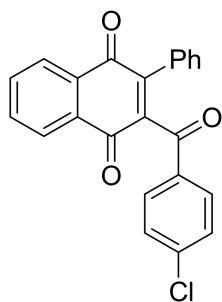

2-(4-Chlorobenzoyl)-3-phenylnaphthalene-1,4-dione (**4g**): Obtained as a yellow solid (62.5 mg, 84% yield), eluting with 20% EtOAc in PE (elution gradient);  $^1\text{H}$  NMR (400 MHz,  $\text{CDCl}_3$ )  $\delta$  8.21 - 8.23 (m, 1H), 8.13 - 8.15 (m, 1H), 7.81 - 7.86 (m, 2H), 7.70 - 7.72 (d,  $J = 8.4$  Hz, 2H), 7.24 - 7.34 (m, 7H);  $^{13}\text{C}$  NMR (101 MHz,  $\text{CDCl}_3$ )  $\delta$  191.8, 184.0, 183.7, 144.8, 143.3, 140.6, 134.5, 134.4, 134.1, 131.8, 131.5, 130.8, 130.3, 129.8, 129.7, 129.1, 128.1, 127.1, 126.4; HRMS (ESI-TOF)  $m/z$  calcd for  $\text{C}_{23}\text{H}_{14}\text{ClO}_3$   $[\text{M} + \text{H}]^+$  373.0626, found 373.0625.

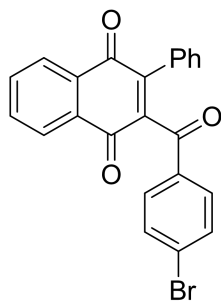

2-(4-Bromobenzoyl)-3-phenylnaphthalene-1,4-dione (**4h**): Obtained as a yellow solid (69.9 mg, 84% yield), eluting with 20% EtOAc in PE (elution gradient);  $^1\text{H}$  NMR (400 MHz,  $\text{CDCl}_3$ )  $\delta$  8.21 - 8.23 (m, 1H), 8.12 - 8.14 (m, 1H), 7.80 - 7.86 (m, 2H), 7.62 - 7.64 (d,  $J = 8.4$  Hz, 2H), 7.48 - 7.50 (d,  $J = 8.4$  Hz, 2H), 7.24 - 7.30 (m, 5H);  $^{13}\text{C}$  NMR (101 MHz,  $\text{CDCl}_3$ )  $\delta$  192.0, 184.0, 183.7, 144.8, 143.3, 134.5, 134.5, 134.4, 132.1, 131.8, 131.5, 130.8, 130.4, 129.8, 129.7, 129.5, 128.1, 127.1, 126.4; HRMS (ESI-TOF)  $m/z$  calcd for  $\text{C}_{23}\text{H}_{14}\text{BrO}_3$   $[\text{M} + \text{H}]^+$  417.0121, found 417.0125.

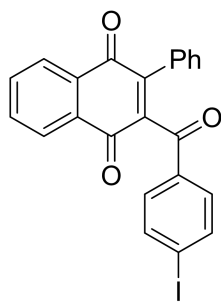

2-(4-Iodobenzoyl)-3-phenylnaphthalene-1,4-dione (**4i**): Obtained as a yellow solid (75.9 mg, 82% yield), eluting with 20% EtOAc in PE (elution gradient);  $^1\text{H}$  NMR (400 MHz,  $\text{CDCl}_3$ )  $\delta$  8.20 - 8.22 (m, 1H), 8.11 - 8.13 (m, 1H), 7.80 - 7.85 (m, 2H), 7.71 - 7.73 (d,  $J = 8.4$  Hz, 2H), 7.46 - 7.48 (d,  $J = 8.8$  Hz, 2H), 7.23 - 7.30 (m, 5H);  $^{13}\text{C}$  NMR (101 MHz,  $\text{CDCl}_3$ )  $\delta$  192.3, 184.0, 183.7, 144.8, 143.2, 138.1, 135.0, 134.5, 134.3, 131.8, 131.5, 130.7, 130.2, 129.8, 129.7, 128.1, 127.1, 126.4, 102.6; HRMS (ESI-TOF)  $m/z$  calcd for  $\text{C}_{23}\text{H}_{14}\text{IO}_3$   $[\text{M} + \text{H}]^+$  464.9982, found 464.9987.

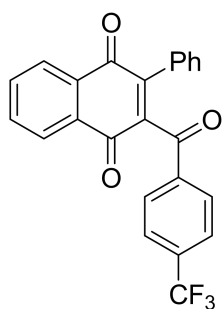

2-Phenyl-3-(4-(trifluoromethyl)benzoyl)naphthalene-1,4-dione (**4j**):

Obtained as a yellow solid (63.3 mg, 78% yield), eluting with 20% EtOAc in PE (elution gradient);  $^1\text{H}$  NMR (400 MHz,  $\text{CDCl}_3$ )  $\delta$  8.22 - 8.24 (m, 1H), 8.13 - 8.15 (m, 1H), 7.82 - 7.89 (m, 4H), 7.61 - 7.63 (d,  $J = 8.0$  Hz, 2H), 7.24 - 7.30 (m, 5H);  $^{13}\text{C}$  NMR (101 MHz,  $\text{CDCl}_3$ )  $\delta$  192.1, 183.9, 183.7, 145.1, 143.1, 138.3, 134.9 (q,  $J = 32.4$ , 65.1 Hz, 1C), 134.6, 134.4, 131.8, 131.5, 130.6, 129.9, 129.7, 129.2, 128.2, 127.2, 126.5, 125.8 (q,  $J = 3.7$ , 7.4 Hz, 1C), 123.3 (q,  $J = 271.3$  Hz, 1C);  $^{19}\text{F}$  NMR (400 MHz,  $\text{CDCl}_3$ )  $\delta$  -63.3; HRMS (ESI-TOF)  $m/z$  calcd for  $\text{C}_{24}\text{H}_{14}\text{O}_3\text{F}_3$   $[\text{M} + \text{H}]^+$  407.0890, found 407.0893.

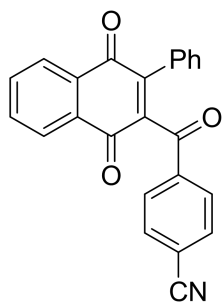

4-(1,4-Dioxo-3-phenyl-1,4-dihydronaphthalene-2-carbonyl)benzonitrile (**4k**):

Obtained as a yellow solid (53.0 mg, 73% yield), eluting with 20% EtOAc in PE (elution gradient);  $^1\text{H}$  NMR (400 MHz,  $\text{CDCl}_3$ )  $\delta$  8.22 - 8.24 (m, 1H), 8.13 - 8.15 (m, 1H), 7.83 - 7.88 (m, 4H), 7.63 - 7.65 (t,  $J = 8.0$  Hz, 2H), 7.26 - 7.33 (m, 3H), 7.21 - 7.23 (d,  $J = 6.8$  Hz, 2H);  $^{13}\text{C}$  NMR (101 MHz,  $\text{CDCl}_3$ )  $\delta$  191.8, 183.7, 183.6, 145.3, 142.7, 138.5, 134.7, 134.5, 132.5, 131.8, 131.5, 130.5, 130.0, 129.7, 129.2, 128.2, 127.2, 126.5, 117.6, 117.0; HRMS (ESI-TOF)  $m/z$  calcd for  $\text{C}_{24}\text{H}_{14}\text{O}_3$   $[\text{M} + \text{H}]^+$  364.0968, found 364.0971.

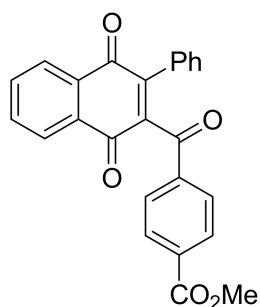

Methyl

4-(1,4-dioxo-3-phenyl-1,4-dihydronaphthalene-2-carbonyl)benzoate (**4l**): Obtained as a yellow solid (60.2 mg, 76% yield), eluting with 20% EtOAc in PE (elution gradient);  $^1\text{H}$  NMR (400 MHz,  $\text{CDCl}_3$ )  $\delta$  8.20 - 8.22 (m, 1H), 8.13 - 8.14 (m, 1H), 7.92 - 7.94 (d,  $J = 8.0$  Hz, 2H), 7.80 - 7.86 (m, 2H), 7.76 - 7.78 (d,  $J = 8.0$  Hz, 2H), 7.49 - 7.52 (t,  $J = 7.2$  Hz, 1H), 7.33 - 7.38 (m, 4H), 3.86 (s, 3H);  $^{13}\text{C}$  NMR (101 MHz,  $\text{CDCl}_3$ )  $\delta$  192.5, 183.7, 183.5, 166.3, 144.4, 143.7, 135.5, 135.4, 134.6, 134.4, 134.3, 131.7, 131.5, 130.9, 129.8, 129.1, 129.0, 128.8, 127.1, 126.5, 52.2; HRMS (ESI-TOF)  $m/z$  calcd for  $\text{C}_{25}\text{H}_{17}\text{O}_5$   $[\text{M} + \text{H}]^+$  397.1071, found 397.1074.

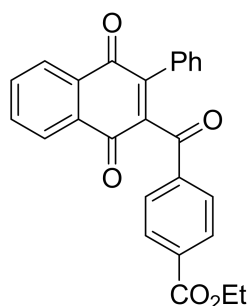

Ethyl

4-(1,4-dioxo-3-phenyl-1,4-dihydronaphthalene-2-carbonyl)benzoate (**4m**): Obtained as a yellow solid (63.1 mg, 77% yield), eluting with 20% EtOAc in PE (elution gradient);  $^1\text{H}$  NMR (400 MHz,  $\text{CDCl}_3$ )  $\delta$  8.15 - 8.17 (m, 1H), 8.07 - 8.09 (m, 1H), 7.93 - 7.95 (d,  $J = 8.0$  Hz, 2H), 7.74 - 7.80 (m, 4H), 7.17 - 7.20 (m, 5H), 4.27 - 4.32 (q,  $J = 6.8, 14.0$  Hz, 2H), 1.29 - 1.32 (t,  $J = 7.2$  Hz, 3H);  $^{13}\text{C}$  NMR (101 MHz,  $\text{CDCl}_3$ )  $\delta$  192.6, 184.0, 183.7, 165.4, 144.9, 143.4, 138.7, 134.9, 134.6, 134.4, 131.9, 131.6, 130.7, 129.8, 129.8, 128.8, 128.1, 127.1, 126.5, 61.5, 14.2; HRMS (ESI-TOF)  $m/z$  calcd for  $\text{C}_{26}\text{H}_{19}\text{O}_5$   $[\text{M} + \text{H}]^+$  411.1227, found 411.1225.

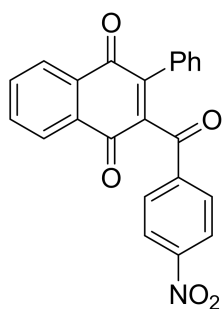

2-(4-Nitrobenzoyl)-3-phenylnaphthalene-1,4-dione (**4n**): Obtained as a yellow solid (54.4 mg, 71% yield), eluting with 20% EtOAc in PE (elution gradient);  $^1\text{H}$  NMR (400 MHz,  $\text{CDCl}_3$ )  $\delta$  8.22 - 8.24 (m, 1H), 8.17 - 8.19 (d,  $J = 8.4$  Hz, 2H), 8.13 - 8.15 (m, 1H), 7.90 - 7.92 (d,  $J = 8.4$  Hz, 2H), 7.83 - 7.88 (m, 2H), 7.23 - 7.29 (m, 5H);  $^{13}\text{C}$  NMR (101 MHz,  $\text{CDCl}_3$ )  $\delta$  191.6, 183.7, 183.5, 150.5, 145.3, 142.6, 139.9, 134.7, 134.5, 131.8, 131.5, 130.5, 130.1, 129.8, 129.8, 128.3, 127.2, 126.5, 123.9; HRMS (ESI-TOF)  $m/z$  calcd for  $\text{C}_{23}\text{H}_{14}\text{NO}_5$   $[\text{M} + \text{H}]^+$  384.0867, found 384.0868.

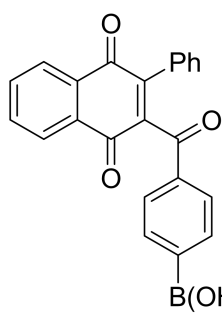

(4-(1,4-Dioxo-3-phenyl-1,4-dihydronaphthalene-2-carbonyl)phenyl)boronic acid (**4o**): Obtained as a yellow solid (66.5 mg, 87% yield), eluting with 20% EtOAc in PE (elution gradient);  $^1\text{H}$  NMR (400 MHz,  $\text{CDCl}_3$ )  $\delta$  8.21 - 8.23 (m, 1H), 8.13 - 8.15 (m, 1H), 7.82 - 7.86 (m, 2H), 7.77 - 7.79 (d,  $J = 8.0$  Hz, 2H), 7.47 - 7.51 (t,  $J = 7.2$  Hz, 1H), 7.34 - 7.37 (t,  $J = 7.6$  Hz, 2H), 7.25 - 7.27 (m, 4H);  $^{13}\text{C}$  NMR (101 MHz,  $\text{CDCl}_3$ )  $\delta$  193.0, 184.2, 183.8, 144.7, 143.9, 135.8, 134.4, 134.3, 134.0, 131.9, 131.6, 131.0, 129.8, 129.6, 129.0, 128.7, 128.0, 127.1, 126.4; HRMS (ESI-TOF)  $m/z$  calcd for  $\text{C}_{23}\text{H}_{16}\text{BO}_5$   $[\text{M} + \text{H}]^+$  383.1085, found 383.1086.

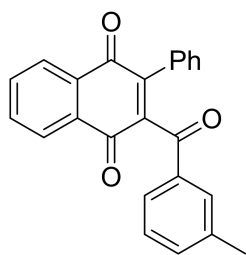

2-(3-Methylbenzoyl)-3-phenylnaphthalene-1,4-dione (**4p**):

Obtained as a yellow solid (66.2 mg, 94% yield), eluting with 20% EtOAc in PE (elution gradient);  $^1\text{H}$  NMR (400 MHz,  $\text{CDCl}_3$ )  $\delta$  8.21 - 8.22 (m, 1H), 8.12 - 8.14 (m, 1H), 7.79 - 7.85 (m, 2H), 7.60 (s, 1H), 7.55 - 7.57 (d,  $J = 7.6$  Hz, 1H), 7.21 - 7.31 (m, 7H), 2.31 (s, 3H);  $^{13}\text{C}$  NMR (101 MHz,  $\text{CDCl}_3$ )  $\delta$  193.1, 184.2, 183.8, 144.5, 144.0, 138.5, 135.7, 134.9, 134.4, 134.2, 131.8, 131.6, 131.0, 129.7, 129.5, 129.3, 128.5, 128.0, 127.0, 126.5, 126.4, 21.2; HRMS (ESI-TOF)  $m/z$  calcd for  $\text{C}_{24}\text{H}_{17}\text{O}_3$   $[\text{M} + \text{H}]^+$  353.1172, found 353.1174.

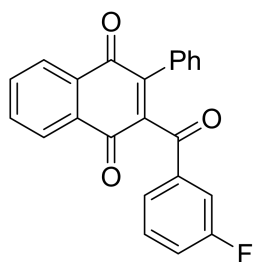

2-(3-Fluorobenzoyl)-3-phenylnaphthalene-1,4-dione (**4q**):

Obtained as a yellow solid (56.2 mg, 79% yield), eluting with 20% EtOAc in PE (elution gradient);  $^1\text{H}$  NMR (400 MHz,  $\text{CDCl}_3$ )  $\delta$  8.21 - 8.23 (m, 1H), 8.13 - 8.15 (m, 1H), 7.81 - 7.86 (m, 2H), 7.51 - 7.53 (d,  $J = 7.6$  Hz, 1H), 7.45 - 7.47 (d,  $J = 9.2$  Hz, 1H), 7.26 - 7.35 (m, 6H), 7.17 - 7.21 (t,  $J = 8.4$  Hz, 1H);  $^{13}\text{C}$  NMR (101 MHz,  $\text{CDCl}_3$ )  $\delta$  191.8, 184.0, 183.6, 162.7 (d,  $J = 247.4$  Hz, 1C), 144.9, 143.3, 137.7 (d,  $J = 6.4$  Hz, 1C), 134.5, 134.4, 131.8, 131.5, 130.7, 130.4 (d,  $J = 7.7$  Hz, 1C), 129.8, 129.7, 128.1, 127.1, 126.4, 125.0 (d,  $J = 2.9$  Hz, 1C), 121.2 (d,  $J = 21.5$  Hz, 1C), 115.3 (d,  $J = 22.5$  Hz, 1C);  $^{19}\text{F}$  NMR (400 MHz,  $\text{CDCl}_3$ )  $\delta$  -110.3; HRMS (ESI-TOF)  $m/z$  calcd for  $\text{C}_{23}\text{H}_{14}\text{O}_3\text{F}$   $[\text{M} + \text{H}]^+$  357.0922, found 357.0925.

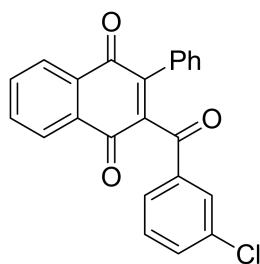

2-(3-Chlorobenzoyl)-3-phenylnaphthalene-1,4-dione (**4r**):

Obtained as a yellow solid (60.3 mg, 81% yield), eluting with 20% EtOAc in PE (elution gradient);  $^1\text{H}$  NMR (400 MHz,  $\text{CDCl}_3$ )  $\delta$  8.21 - 8.23 (m, 1H), 8.13 - 8.15 (m, 1H), 7.81 - 7.86 (m, 2H), 7.74 (s, 1H), 7.62 - 7.64 (d,  $J = 7.6$  Hz, 1H), 7.44 - 7.46 (d,  $J = 8.0$  Hz, 1H), 7.24 - 7.32 (m, 6H);  $^{13}\text{C}$  NMR (101 MHz,  $\text{CDCl}_3$ )  $\delta$  191.7, 184.0, 183.6, 144.9, 143.1, 137.2, 135.0, 134.5, 134.4, 133.9, 131.8, 131.5, 130.7, 130.0, 129.8, 129.7, 128.7, 128.1, 127.2, 127.1, 126.5; HRMS (ESI-TOF)  $m/z$  calcd for  $\text{C}_{23}\text{H}_{14}\text{ClO}_3$   $[\text{M} + \text{H}]^+$  373.0626, found 373.0628.

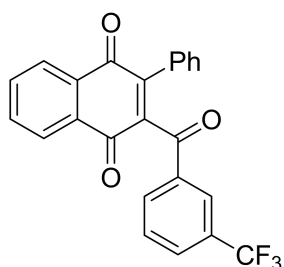

2-Phenyl-3-(3-(trifluoromethyl)benzoyl)naphthalene-1,4-dione

(**4s**): Obtained as a yellow solid (56.8 mg, 70% yield), eluting with 20% EtOAc in PE (elution gradient);  $^1\text{H}$  NMR (400 MHz,  $\text{CDCl}_3$ )  $\delta$  8.22 - 8.24 (m, 1H), 8.14 - 8.16 (m, 1H), 7.99 (s, 1H), 7.92 - 7.94 (d,  $J = 7.6$  Hz, 1H), 7.82 - 7.87 (m, 2H), 7.71 - 7.73 (d,  $J = 7.6$  Hz, 1H), 7.47 - 7.50 (t,  $J = 8.0$  Hz, 1H), 7.24 - 7.28 (m, 5H);  $^{13}\text{C}$  NMR (101 MHz,  $\text{CDCl}_3$ )  $\delta$  191.7, 183.9, 183.6, 145.1, 142.8, 136.1, 134.6, 134.4, 132.0, 131.5 (q,  $J = 26.0, 36.0$  Hz, 1C), 130.7, 130.3 (q,  $J = 3.8, 7.3$  Hz, 1C), 129.9, 129.7, 129.4, 128.7 (d,  $J = 168.4$  Hz, 1C), 128.2, 127.2, 126.5, 125.7 (q,  $J = 3.5, 7.2$  Hz, 1C), 123.4 (q,  $J = 160.2, 271.2$  Hz, 1C);  $^{19}\text{F}$  NMR (400 MHz,  $\text{CDCl}_3$ )  $\delta$  -62.9; HRMS (ESI-TOF)  $m/z$  calcd for  $\text{C}_{24}\text{H}_{14}\text{O}_3\text{F}_3$   $[\text{M} + \text{H}]^+$  407.0890, found 407.0893.

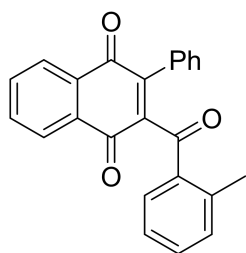

2-(2-Methylbenzoyl)-3-phenylnaphthalene-1,4-dione (**4t**):

Obtained as a yellow solid (59.1 mg, 84% yield), eluting with 20% EtOAc in PE (elution gradient);  $^1\text{H}$  NMR (400 MHz,  $\text{CDCl}_3$ )  $\delta$  8.11 - 8.14 (m, 1H), 8.06 - 8.08 (m, 1H), 7.72 - 7.77 (m, 2H), 7.41 - 7.43 (d,  $J = 7.6$  Hz, 1H), 7.13 - 7.24 (m, 6H), 7.02 - 7.07 (m, 2H), 2.40 (s, 3H);  $^{13}\text{C}$  NMR (101 MHz,  $\text{CDCl}_3$ )  $\delta$  194.5, 184.5, 184.0, 145.1, 143.9, 140.4, 135.1, 134.4, 134.2, 132.7, 132.1, 131.8, 131.6, 131.4, 131.1, 129.5, 129.4, 127.9, 127.0, 126.4, 125.6, 21.5; HRMS (ESI-TOF)  $m/z$  calcd for  $\text{C}_{24}\text{H}_{17}\text{O}_3$  [ $\text{M} + \text{H}$ ] $^+$  353.1172, found 353.1170.

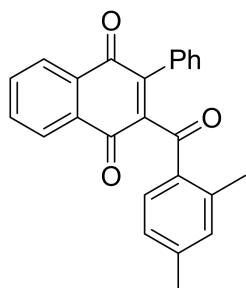

2-(2,4-Dimethylbenzoyl)-3-phenylnaphthalene-1,4-dione (**4u**):

Obtained as a yellow solid (65.9 mg, 90% yield), eluting with 20% EtOAc in PE (elution gradient);  $^1\text{H}$  NMR (400 MHz,  $\text{CDCl}_3$ )  $\delta$  8.19 - 8.21 (m, 1H), 8.13 - 8.15 (m, 1H), 7.79 - 7.84 (m, 2H), 7.40 - 7.42 (d,  $J = 8.0$  Hz, 1H), 7.23 - 7.28 (m, 5H), 6.96 (s, 1H), 6.90 - 6.92 (d,  $J = 7.6$  Hz, 1H), 2.46 (s, 3H), 2.27 (s, 3H);  $^{13}\text{C}$  NMR (101 MHz,  $\text{CDCl}_3$ )  $\delta$  194.0, 184.6, 184.1, 145.2, 143.7, 143.7, 140.6, 134.3, 134.2, 133.1, 132.4, 132.0, 131.9, 131.6, 131.2, 129.6, 129.3, 127.9, 126.9, 126.4, 126.3, 21.6, 21.5; HRMS (ESI-TOF)  $m/z$  calcd for  $\text{C}_{25}\text{H}_{19}\text{O}_3$  [ $\text{M} + \text{H}$ ] $^+$  367.1329, found 367.1327.

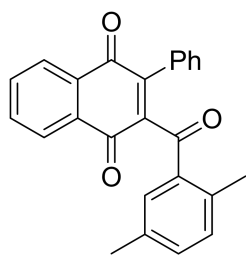

2-(2,5-Dimethylbenzoyl)-3-phenylnaphthalene-1,4-dione (**4v**):

Obtained as a yellow solid (63.7 mg, 87% yield), eluting with 20% EtOAc in PE (elution gradient);  $^1\text{H}$  NMR (400 MHz,  $\text{CDCl}_3$ )  $\delta$  8.21 - 8.22 (m, 1H), 8.15 - 8.17 (m, 1H), 7.82 - 7.84 (m, 2H), 7.26 - 7.28 (m, 4H), 7.20 - 7.22 (m, 2H), 7.10 - 7.12 (d,  $J$  = 7.6 Hz, 1H), 7.01 - 7.03 (d,  $J$  = 7.6 Hz, 1H), 2.41 (s, 3H), 2.22 (s, 3H);  $^{13}\text{C}$  NMR (101 MHz,  $\text{CDCl}_3$ )  $\delta$  194.6, 184.6, 184.1, 145.2, 143.8, 137.3, 135.1, 135.0, 134.3, 134.2, 133.6, 132.0, 131.9, 131.8, 131.7, 131.2, 129.5, 129.4, 127.9, 127.0, 126.5, 21.0, 20.8.; HRMS (ESI-TOF)  $m/z$  calcd for  $\text{C}_{25}\text{H}_{19}\text{O}_3$   $[\text{M} + \text{H}]^+$  367.1329, found 367.1327.

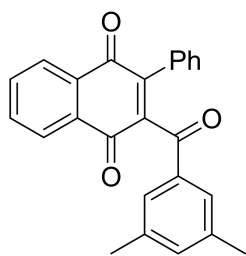

2-(3,5-Dimethylbenzoyl)-3-phenylnaphthalene-1,4-dione (**4w**):

Obtained as a yellow solid (70.3 mg, 96% yield), eluting with 20% EtOAc in PE (elution gradient);  $^1\text{H}$  NMR (400 MHz,  $\text{CDCl}_3$ )  $\delta$  8.22 - 8.23 (m, 1H), 8.13 - 8.15 (m, 1H), 7.79 - 7.85 (m, 2H), 7.38 (s, 2H), 7.25 - 7.29 (m, 5H), 7.12 (s, 1H), 2.27 (s, 6H);  $^{13}\text{C}$  NMR (101 MHz,  $\text{CDCl}_3$ )  $\delta$  193.3, 184.3, 183.9, 144.4, 144.1, 138.4, 135.89, 135.85, 134.3, 134.2, 131.9, 131.7, 131.1, 129.7, 129.5, 128.0, 127.0, 126.8, 126.4, 21.1; HRMS (ESI-TOF)  $m/z$  calcd for  $\text{C}_{25}\text{H}_{19}\text{O}_3$   $[\text{M} + \text{H}]^+$  367.1329, found 367.1328.

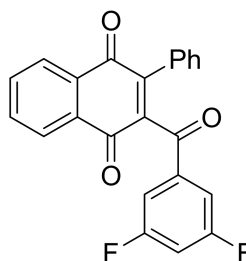

2-(3,5-Difluorobenzoyl)-3-phenylnaphthalene-1,4-dione (**4x**):

Obtained as a yellow solid (53.1 mg, 71% yield), eluting with 20% EtOAc in PE

(elution gradient);  $^1\text{H}$  NMR (400 MHz,  $\text{CDCl}_3$ )  $\delta$  8.21 - 8.23 (m, 1H), 8.13 - 8.15 (m, 1H), 7.82 - 7.87 (m, 2H), 7.25 - 7.32 (m, 7H), 6.91 - 6.95 (m, 1H);  $^{13}\text{C}$  NMR (101 MHz,  $\text{CDCl}_3$ )  $\delta$  190.6, 183.8, 183.5, 163.0 (d,  $J = 250.4$  Hz, 1C), 162.8 (d,  $J = 250.4$  Hz, 1C), 145.2, 142.6, 138.5 (t,  $J = 7.8$  Hz, 1C), 134.7, 134.4, 131.8, 131.5, 130.6, 130.0, 129.7, 128.2, 127.2, 126.5, 111.9 (d,  $J = 7.4$  Hz, 1C), 111.7 (d,  $J = 7.5$  Hz, 1C), 109.3 (t,  $J = 25.4$  Hz, 1C);  $^{19}\text{F}$  NMR (400 MHz,  $\text{CDCl}_3$ )  $\delta$  -107.4; HRMS (ESI-TOF)  $m/z$  calcd for  $\text{C}_{23}\text{H}_{13}\text{O}_3\text{F}_2$   $[\text{M} + \text{H}]^+$  375.0827, found 375.0828.

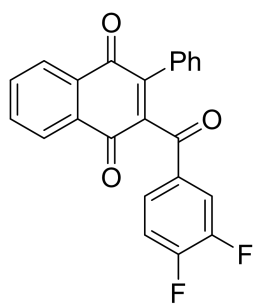

2-(3,4-Difluorobenzoyl)-3-phenylnaphthalene-1,4-dione (**4y**):

Obtained as a yellow solid (53.1 mg, 71% yield), eluting with 20% EtOAc in PE (elution gradient);  $^1\text{H}$  NMR (400 MHz,  $\text{CDCl}_3$ )  $\delta$  8.21 - 8.23 (m, 1H), 8.13 - 8.15 (m, 1H), 7.81 - 7.87 (m, 2H), 7.60 - 7.64 (t,  $J = 9.6$  Hz, 1H), 7.52 - 7.53 (m, 1H), 7.23 - 7.31 (m, 5H), 7.09 - 7.16 (q,  $J = 8.4, 16.8$  Hz, 1H);  $^{13}\text{C}$  NMR (101 MHz,  $\text{CDCl}_3$ )  $\delta$  190.5, 183.8, 183.6, 154.1 (dd,  $J = 12.9, 257.5$  Hz, 1C), 150.4 (dd,  $J = 13.0, 250.6$  Hz, 1C), 145.0, 142.8, 134.6, 134.4, 132.8 (t,  $J = 3.9$  Hz, 1C), 131.8, 131.5, 130.7, 129.9, 129.7, 128.2, 127.1, 126.5, 126.3 (dd,  $J = 3.5, 7.7$  Hz, 1C), 117.9 (dd,  $J = 1.6, 18.0$  Hz, 1C), 117.7 (d,  $J = 18.0$  Hz, 1C);  $^{19}\text{F}$  NMR (400 MHz,  $\text{CDCl}_3$ )  $\delta$  -127.3 (d,  $J = 22.0$  Hz, 1F), -135.3 (d,  $J = 22.1$  Hz, 1F); HRMS (ESI-TOF)  $m/z$  calcd for  $\text{C}_{23}\text{H}_{13}\text{O}_3\text{F}_2$   $[\text{M} + \text{H}]^+$  375.0827, found 375.0826.

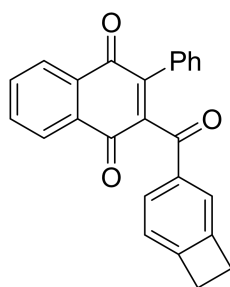

2-(Bicyclo[4.2.0]octa-1,3,5-triene-3-carbonyl)-3-phenylnaphthalene-1,4-dione (**4z**): Obtained as a yellow solid (64.1 mg, 88% yield), eluting with 20%

EtOAc in PE (elution gradient);  $^1\text{H}$  NMR (400 MHz,  $\text{CDCl}_3$ )  $\delta$  8.20 - 8.22 (m, 1H), 8.12 - 8.14 (m, 1H), 7.79 - 7.84 (m, 2H), 7.66 - 7.68 (d,  $J = 7.6$  Hz, 1H), 7.49 (s, 1H), 7.27 - 7.31 (m, 5H), 7.02 - 7.04 (d,  $J = 7.6$  Hz, 1H), 3.14 (s, 4H);  $^{13}\text{C}$  NMR (101 MHz,  $\text{CDCl}_3$ )  $\delta$  193.1, 184.3, 183.9, 153.5, 146.3, 144.4, 135.0, 134.3, 134.2, 131.9, 131.6, 131.1, 129.7, 129.5, 129.0, 128.0, 127.0, 126.4, 122.9, 122.7, 30.0, 29.3; HRMS (ESI-TOF)  $m/z$  calcd for  $\text{C}_{25}\text{H}_{17}\text{O}_3$   $[\text{M} + \text{H}]^+$  365.1172, found 365.1173.

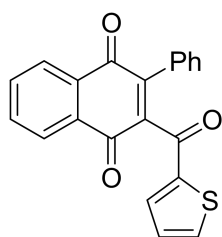

2-Phenyl-3-(thiophene-2-carbonyl)naphthalene-1,4-dione (**4aa**):

Obtained as a yellow solid (59.9 mg, 87% yield), eluting with 20% EtOAc in PE (elution gradient);  $^1\text{H}$  NMR (400 MHz,  $\text{CDCl}_3$ )  $\delta$  8.20 - 8.22 (m, 1H), 8.14 - 8.16 (m, 1H), 7.82 - 7.84 (m, 2H), 7.59 - 7.61 (d,  $J = 4.8$  Hz, 1H), 7.45 - 7.47 (d,  $J = 3.6$  Hz, 1H), 7.29 - 7.34 (m, 5H), 6.97 - 6.99 (m, 1H);  $^{13}\text{C}$  NMR (101 MHz,  $\text{CDCl}_3$ )  $\delta$  184.5, 184.2, 183.2, 144.5, 143.2, 142.9, 135.6, 134.5, 134.4, 134.3, 131.8, 131.6, 130.9, 129.9, 129.7, 128.2, 128.1, 127.0, 126.5; HRMS (ESI-TOF)  $m/z$  calcd for  $\text{C}_{21}\text{H}_{13}\text{O}_3\text{S}$   $[\text{M} + \text{H}]^+$  345.0580, found 345.0578.

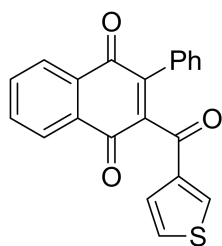

2-Phenyl-3-(thiophene-3-carbonyl)naphthalene-1,4-dione (**4ab**):

Obtained as a yellow solid (61.2 mg, 89% yield), eluting with 20% EtOAc in PE (elution gradient);  $^1\text{H}$  NMR (400 MHz,  $\text{CDCl}_3$ )  $\delta$  8.20 - 8.22 (m, 1H), 8.14 - 8.16 (m, 1H), 7.80 - 7.86 (m, 3H), 7.39 - 7.41 (d,  $J = 5.2$  Hz, 1H), 7.28 - 7.32 (m, 5H), 7.20 - 7.22 (m, 1H);  $^{13}\text{C}$  NMR (101 MHz,  $\text{CDCl}_3$ )  $\delta$  186.2, 184.3, 183.5, 144.1, 143.9, 141.2, 134.8, 134.4, 134.3, 131.8, 131.6, 131.0, 129.8, 129.7, 128.1, 127.0, 126.8, 126.7, 126.4; HRMS (ESI-TOF)  $m/z$  calcd for  $\text{C}_{21}\text{H}_{13}\text{O}_3\text{S}$   $[\text{M} + \text{H}]^+$  345.0580, found 345.0581.

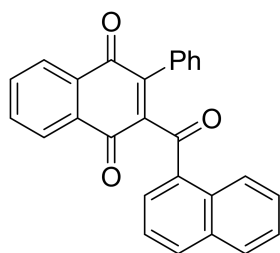

2-(1-Naphthoyl)-3-phenylnaphthalene-1,4-dione (**4ac**):

Obtained as a yellow solid (63.6 mg, 82% yield), eluting with 20% EtOAc in PE (elution gradient);  $^1\text{H}$  NMR (400 MHz,  $\text{CDCl}_3$ )  $\delta$  8.98 - 9.00 (d,  $J = 8.8$  Hz, 1H), 8.21 - 8.23 (m, 1H), 8.14 - 8.16 (m, 1H), 7.92 - 7.94 (d,  $J = 8.4$  Hz, 1H), 7.79 - 7.85 (m, 4H), 7.59 - 7.63 (t,  $J = 7.6$  Hz, 1H), 7.50 - 7.53 (t,  $J = 7.6$  Hz, 1H), 7.32 - 7.36 (t,  $J = 7.6$  Hz, 1H), 7.27 - 7.29 (d,  $J = 7.2$  Hz, 2H), 7.13 - 7.19 (m, 3H);  $^{13}\text{C}$  NMR (101 MHz,  $\text{CDCl}_3$ )  $\delta$  194.5, 184.5, 184.1, 145.0, 144.1, 134.9, 134.4, 134.3, 133.8, 132.4, 131.9, 131.7, 131.1, 130.4, 129.6, 129.3, 128.8, 128.3, 128.0, 127.0, 126.7, 126.5, 125.9, 124.1; HRMS (ESI-TOF)  $m/z$  calcd for  $\text{C}_{27}\text{H}_{17}\text{O}_3$   $[\text{M} + \text{H}]^+$  389.1172, found 389.1173.

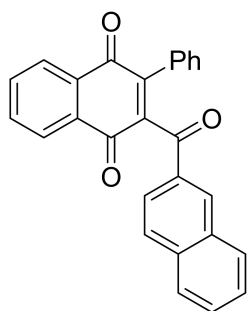

2-(2-Naphthoyl)-3-phenylnaphthalene-1,4-dione (**4ad**):

Obtained as a yellow solid (69.8 mg, 90% yield), eluting with 20% EtOAc in PE (elution gradient);  $^1\text{H}$  NMR (400 MHz,  $\text{CDCl}_3$ )  $\delta$  8.15 - 8.16 (m, 2H), 8.05 - 8.07 (m, 1H), 7.70 - 7.81 (m, 6H), 7.46 - 7.49 (t,  $J = 7.2$  Hz, 1H), 7.38 - 7.42 (t,  $J = 7.6$  Hz, 1H), 7.21 - 7.43 (m, 2H), 7.13 - 7.16 (m, 3H);  $^{13}\text{C}$  NMR (101 MHz,  $\text{CDCl}_3$ )  $\delta$  192.9, 184.2, 183.9, 144.7, 143.9, 135.9, 134.4, 134.3, 133.2, 132.3, 131.9, 131.8, 131.6, 131.0, 129.7, 129.6, 129.0, 128.8, 128.0, 127.8, 127.0, 126.9, 126.4, 123.7; HRMS (ESI-TOF)  $m/z$  calcd for  $\text{C}_{27}\text{H}_{17}\text{O}_3$   $[\text{M} + \text{H}]^+$  389.1172, found 389.1170.

# Copies of $^1\text{H}$ and $^{13}\text{C}$ NMR spectra of products

## $^1\text{H}$ NMR and $^{13}\text{C}$ NMR of 3a

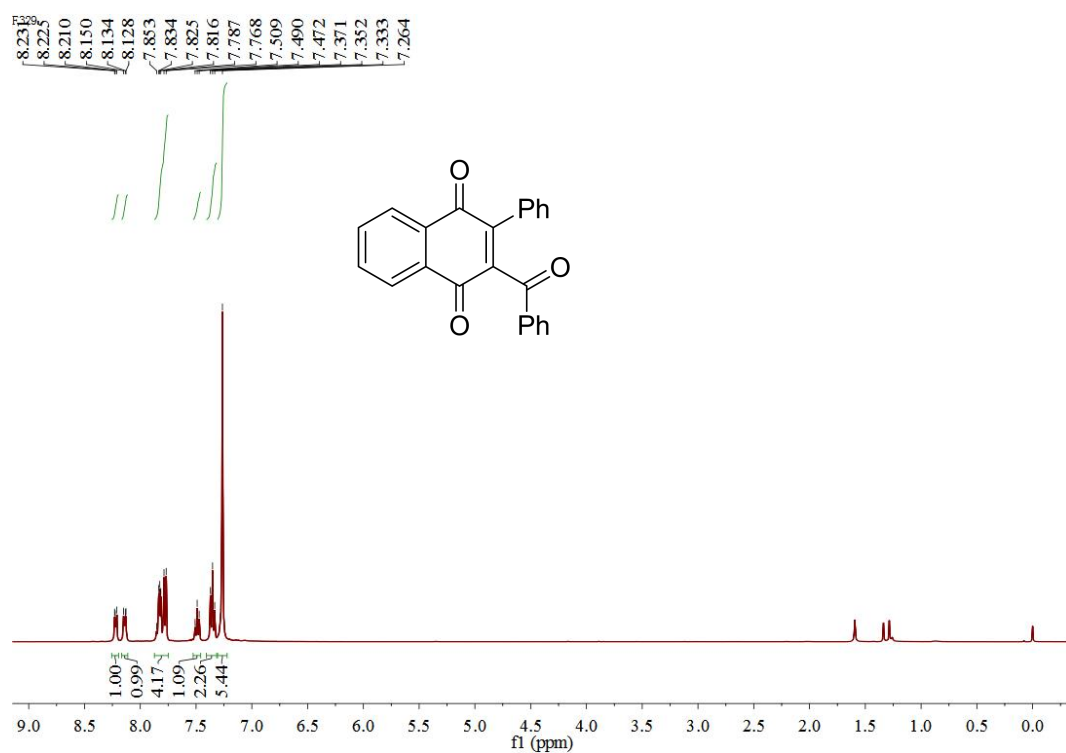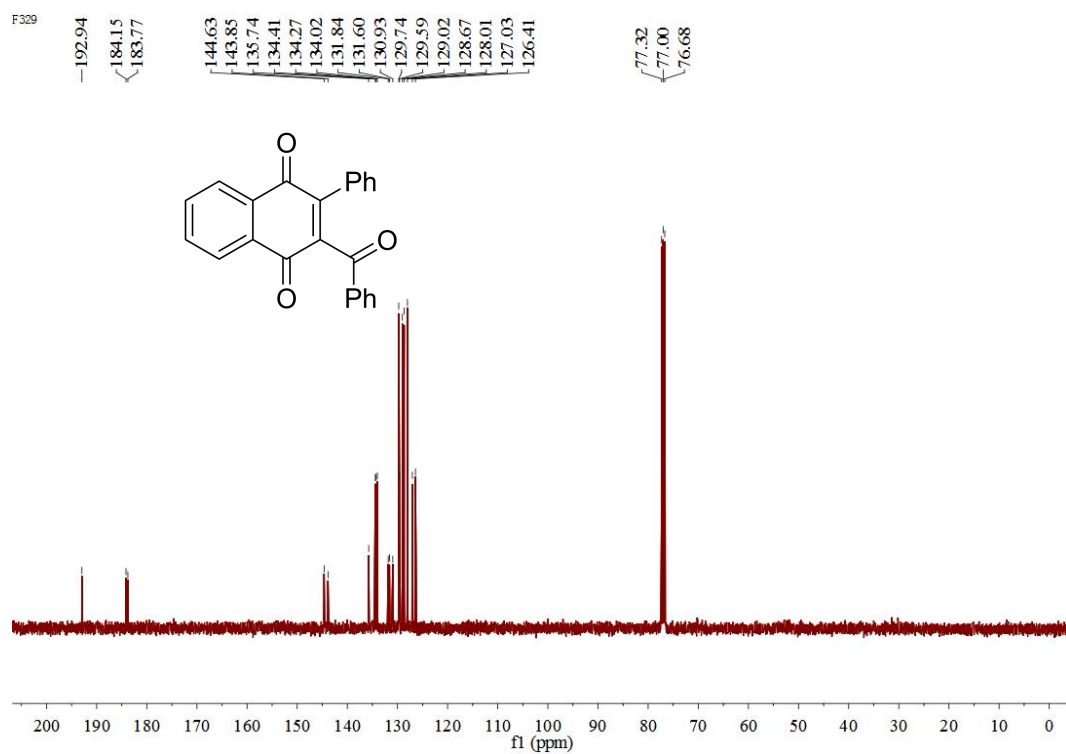

# <sup>1</sup>H NMR and <sup>13</sup>C NMR of 3b

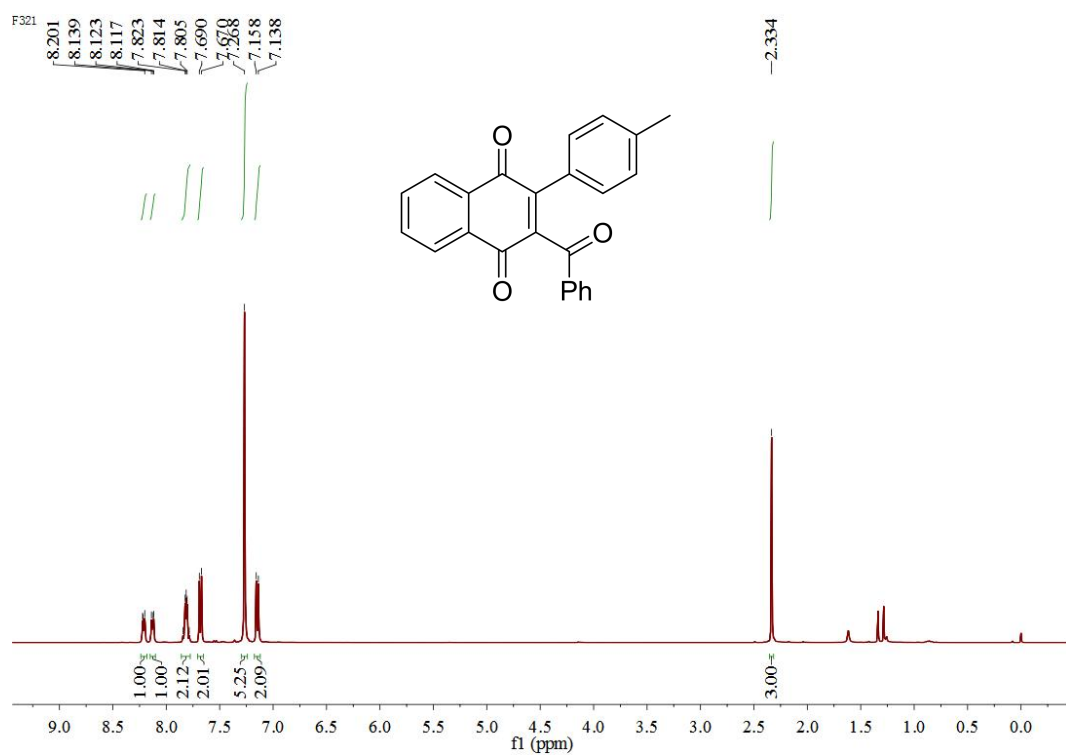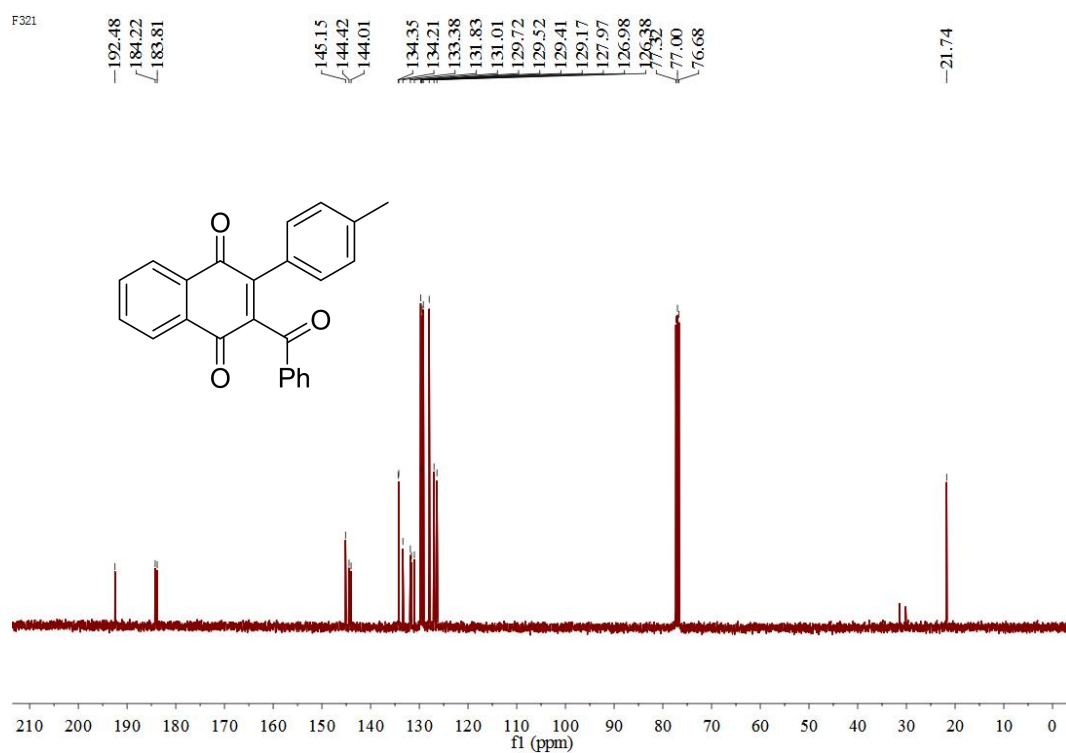

# <sup>1</sup>H NMR and <sup>13</sup>C NMR of 3b

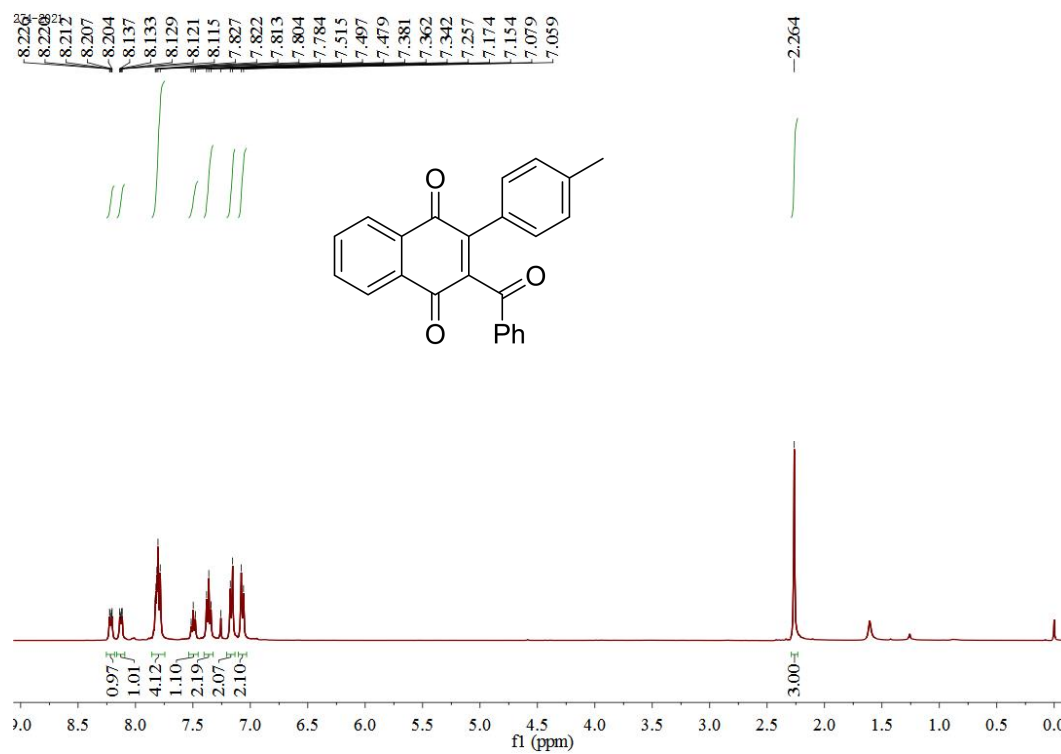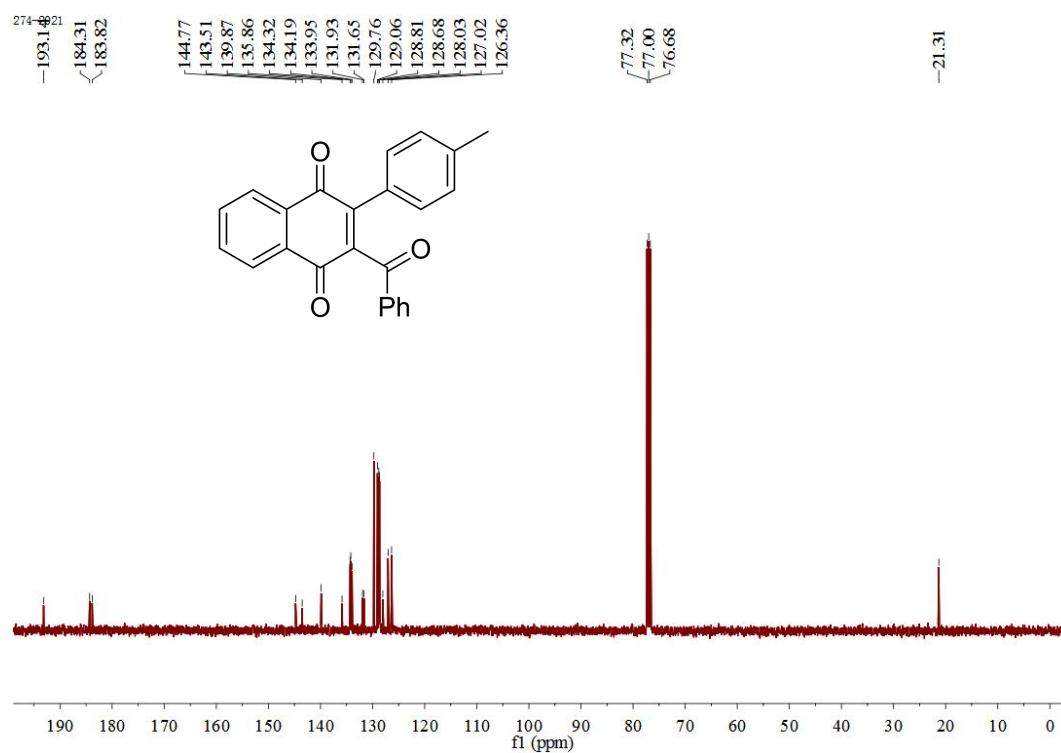

# <sup>1</sup>H NMR and <sup>13</sup>C NMR of 3c

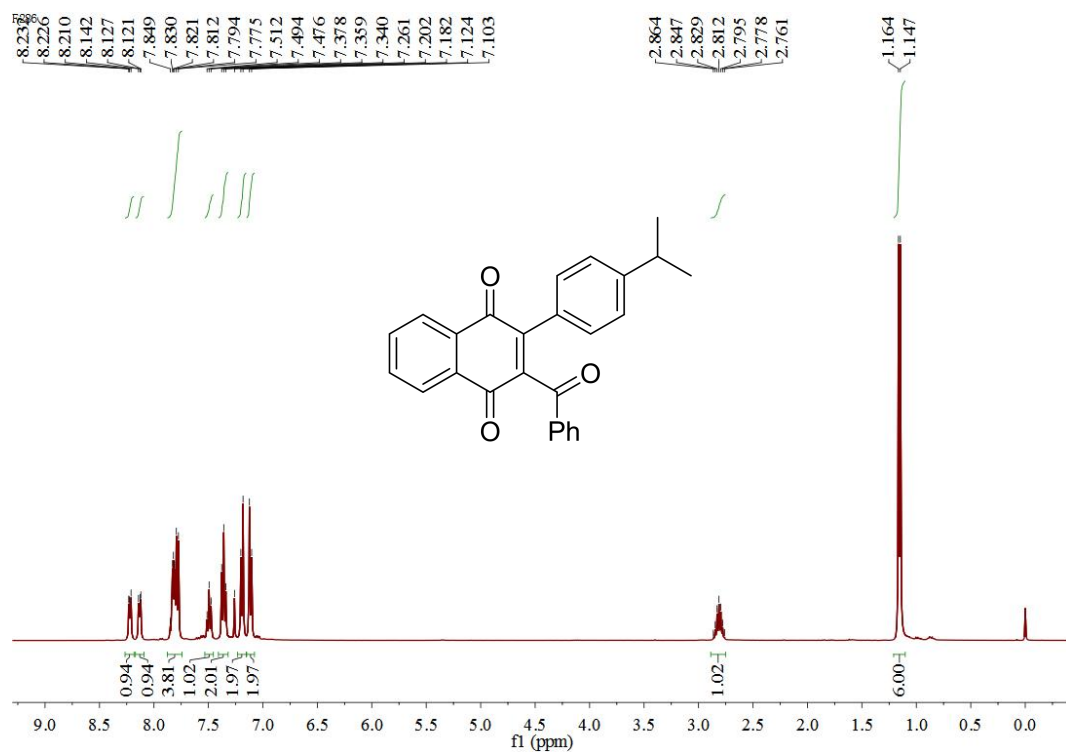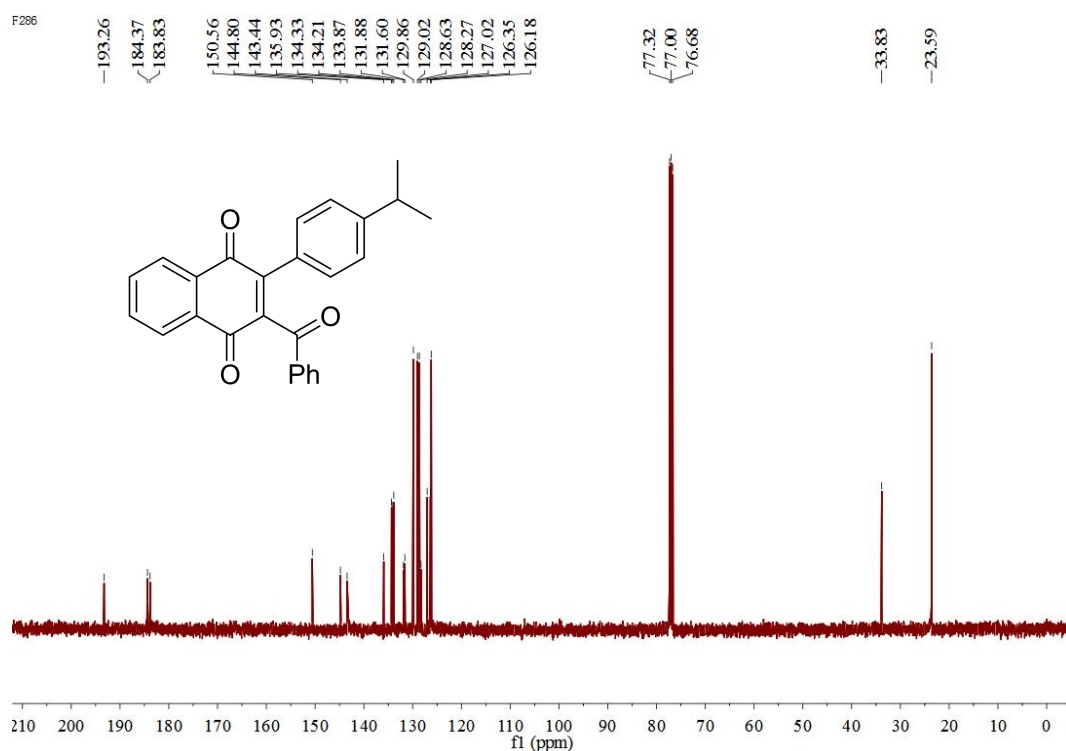

# <sup>1</sup>H NMR and <sup>13</sup>C NMR of 3d

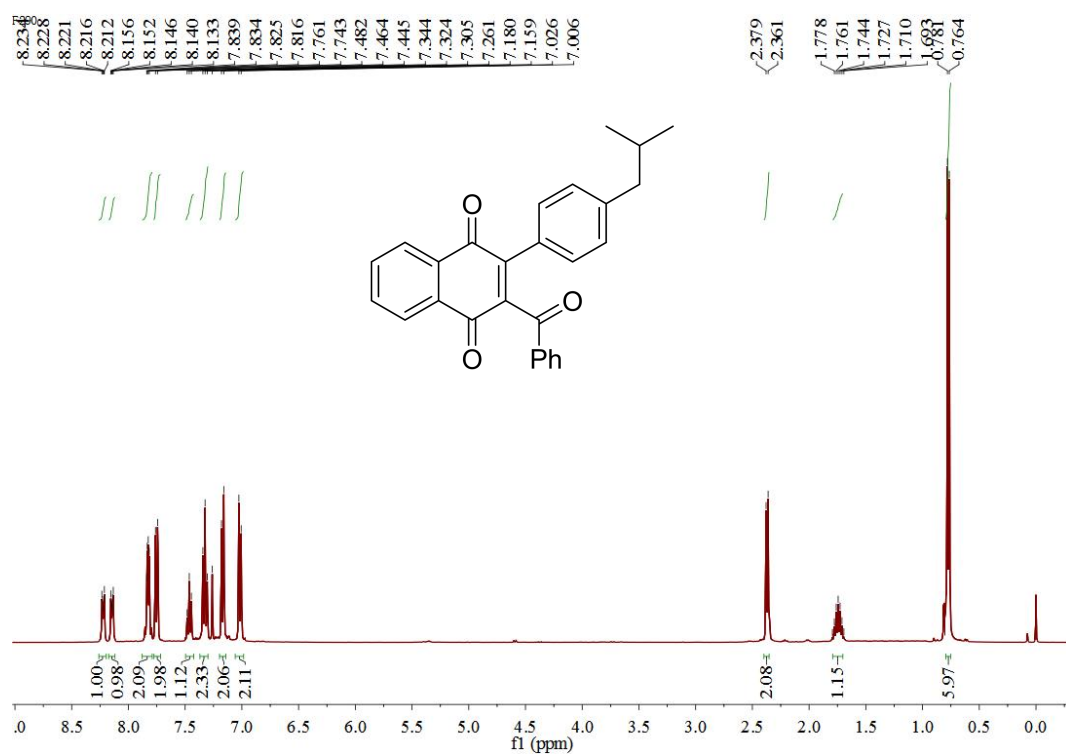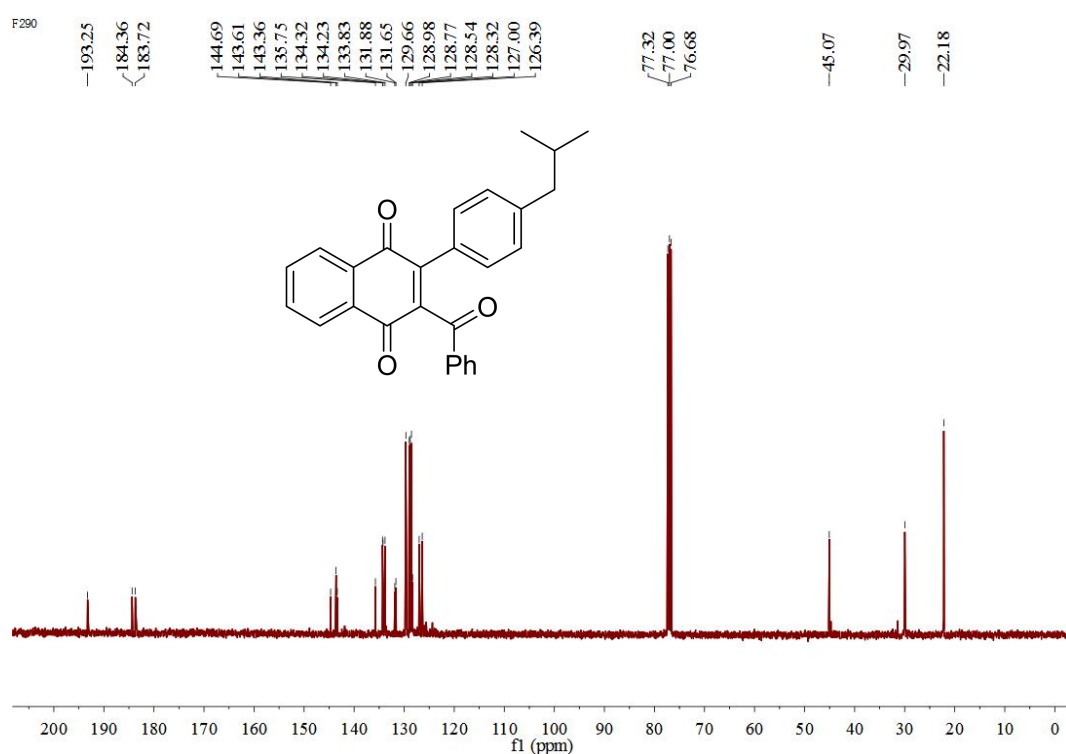

# <sup>1</sup>H NMR and <sup>13</sup>C NMR of 3e

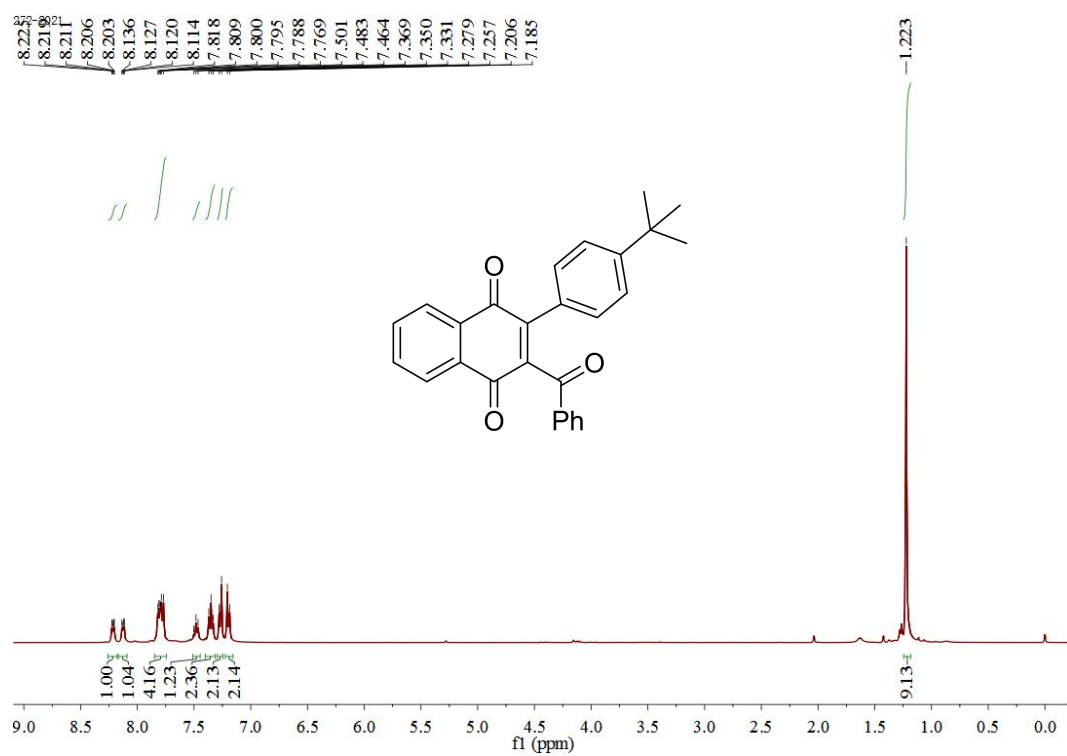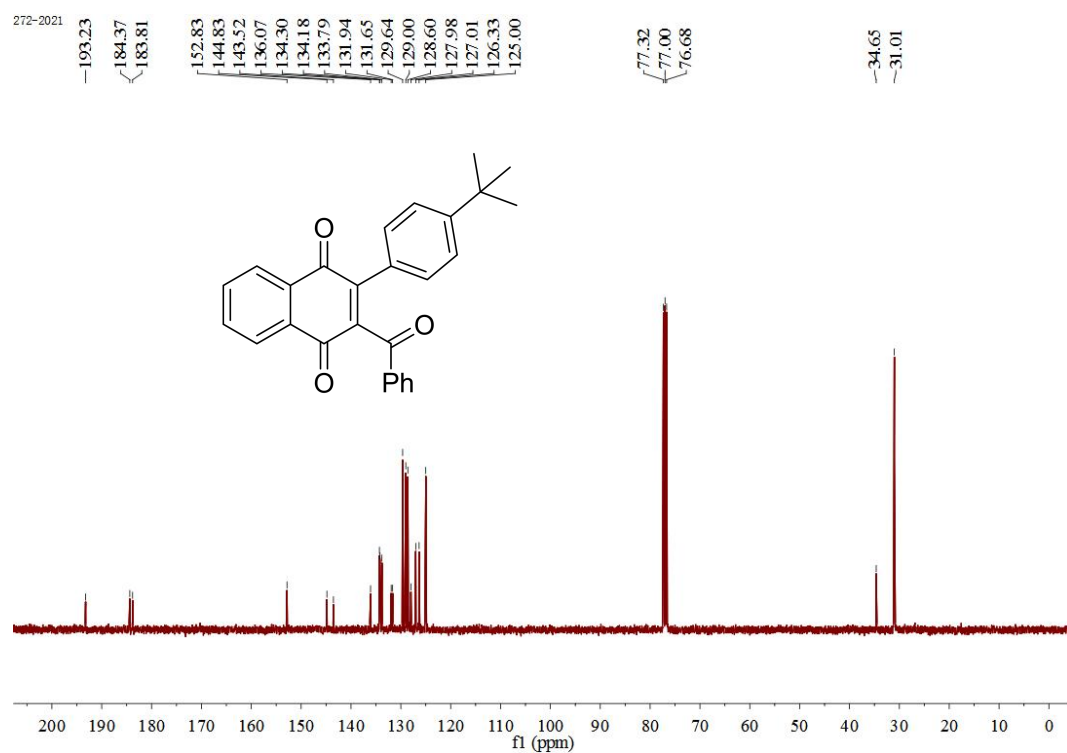

# <sup>1</sup>H NMR and <sup>13</sup>C NMR of 3f

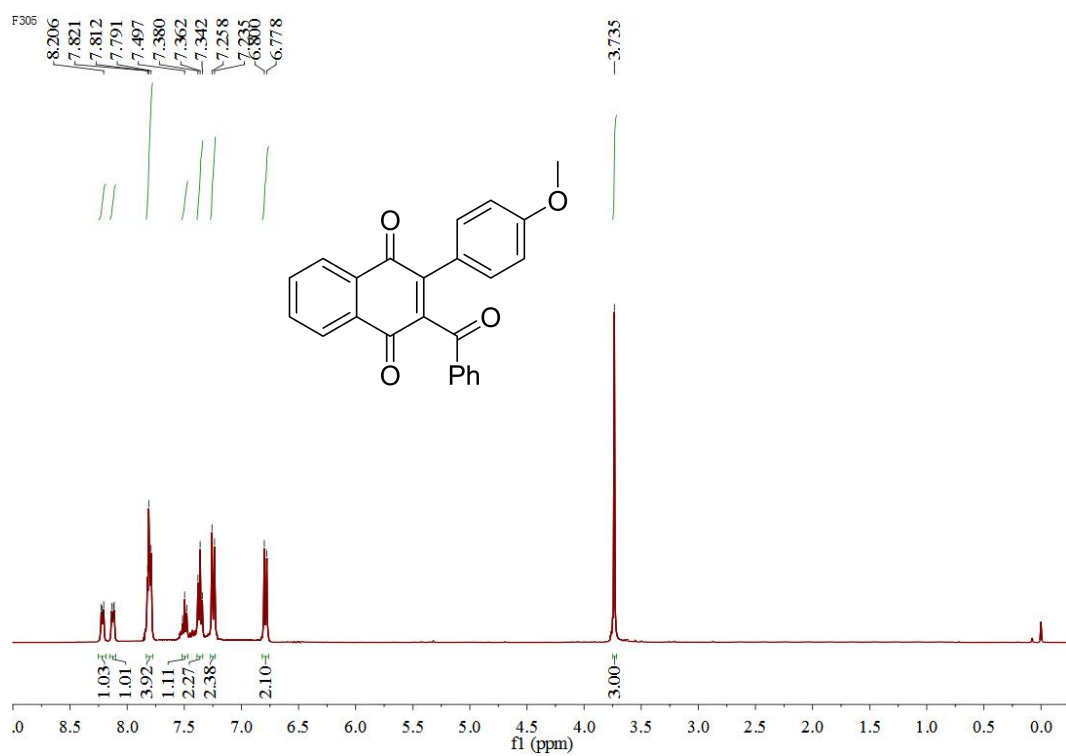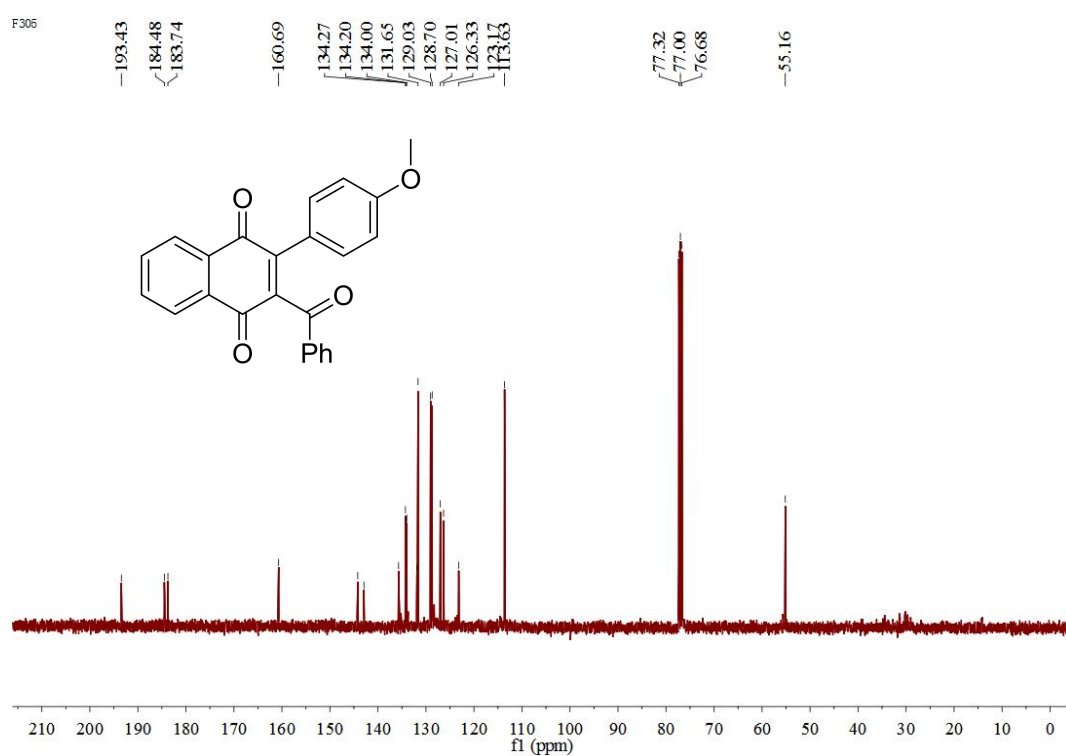

**$^1\text{H}$  NMR,  $^{13}\text{C}$  NMR and  $^{19}\text{F}$  NMR of 3g**

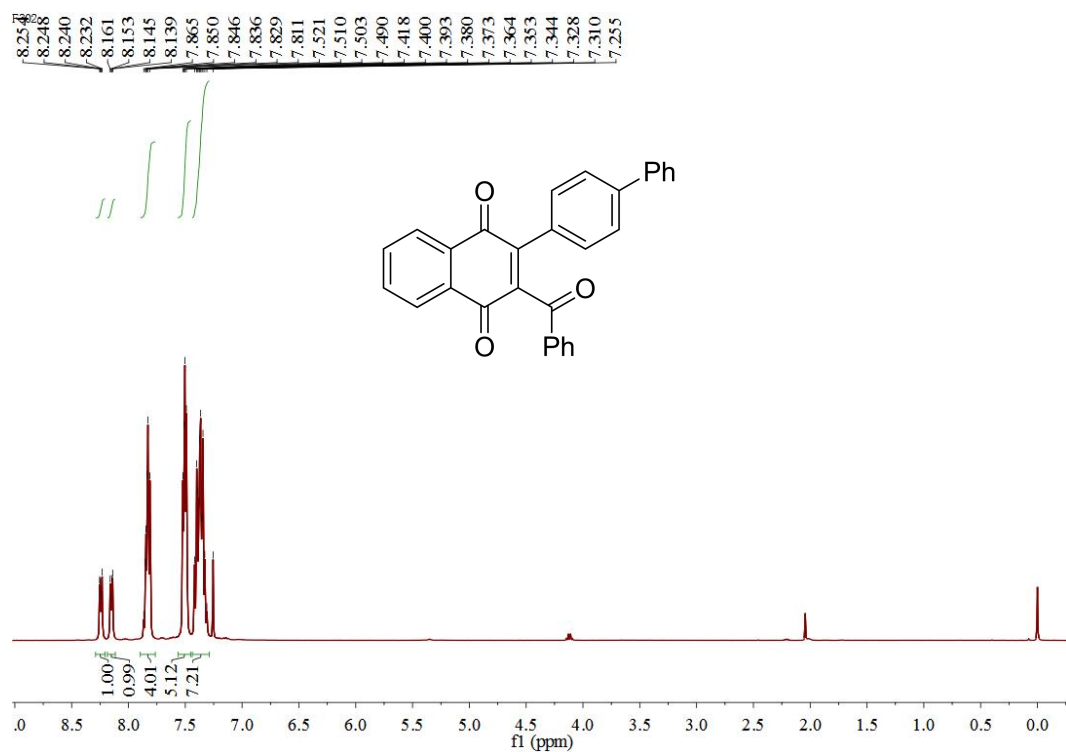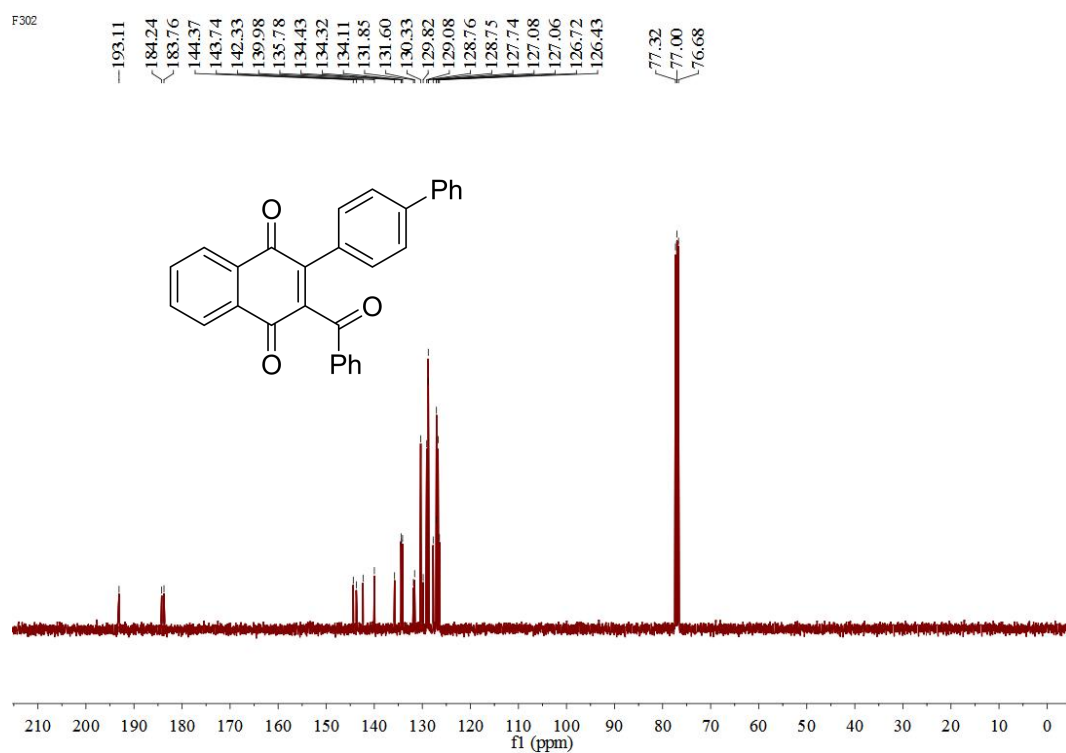

# <sup>1</sup>H NMR and <sup>13</sup>C NMR of 3h

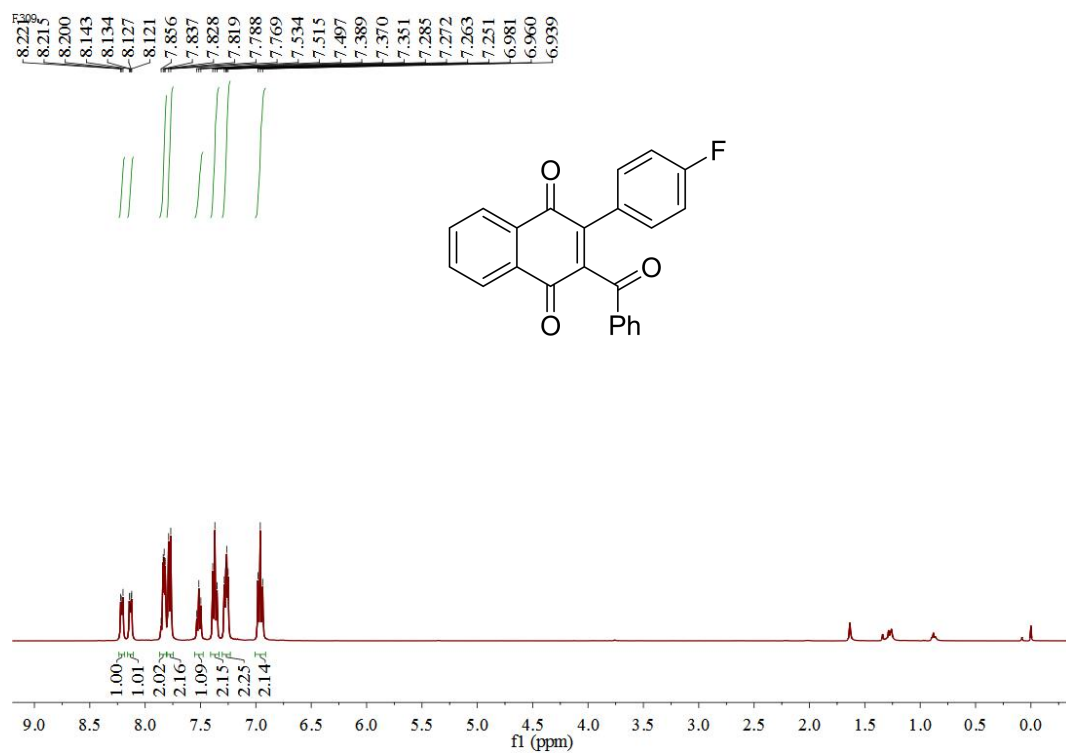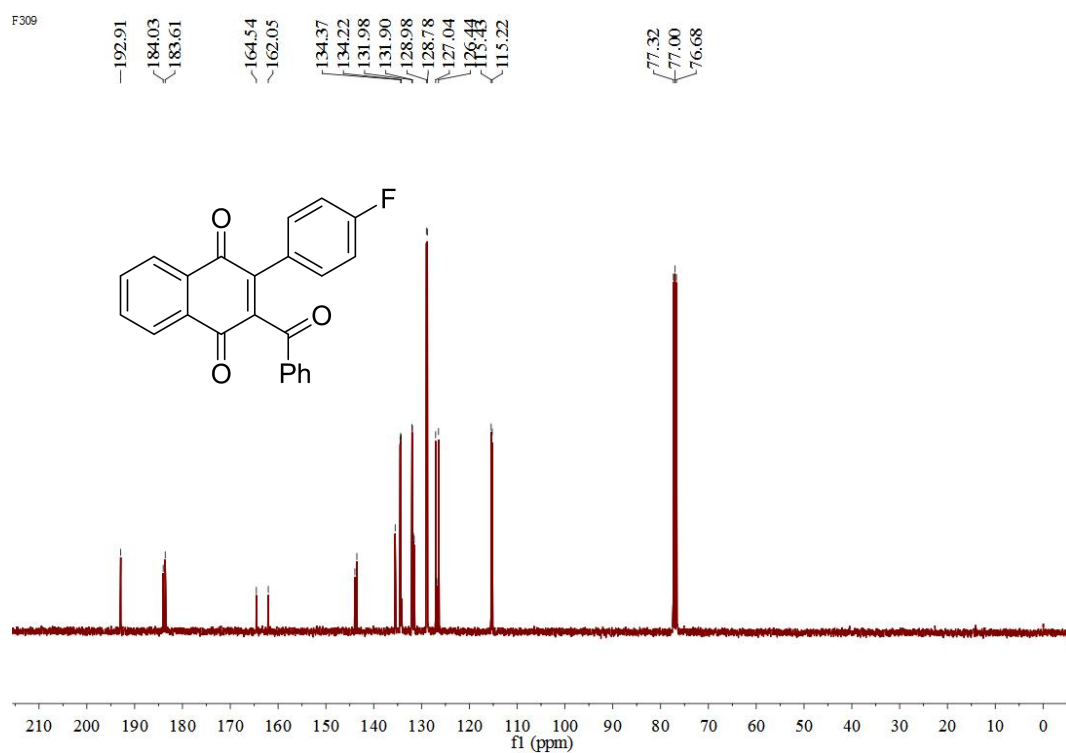

F309

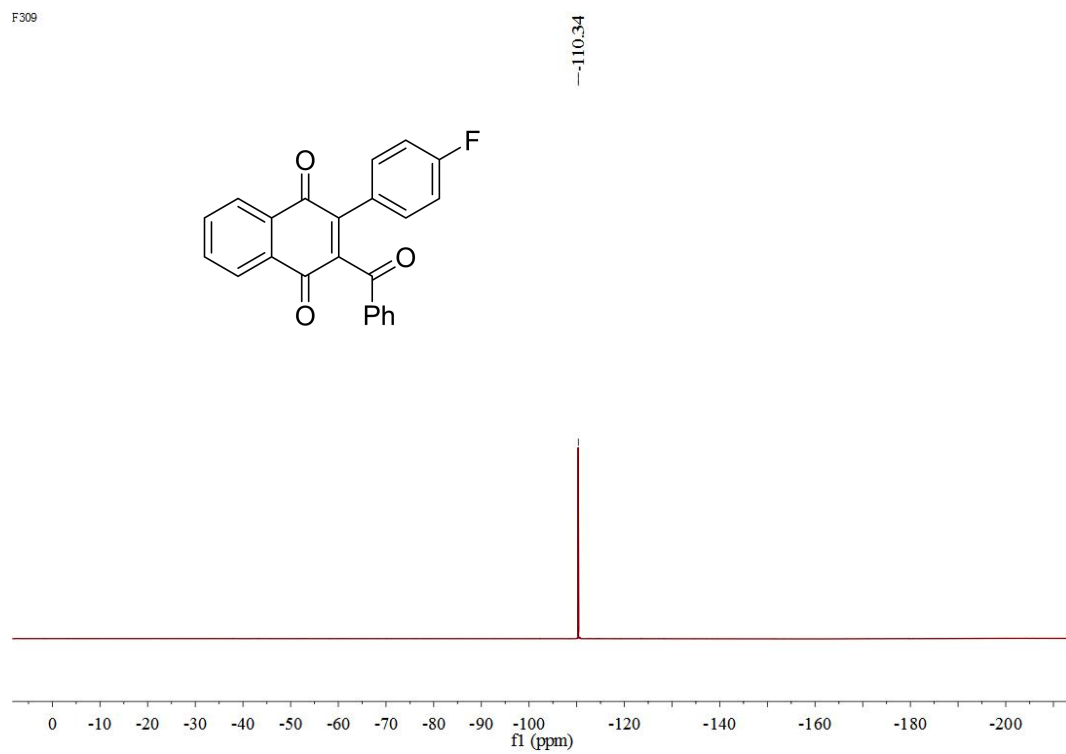

# <sup>1</sup>H NMR, <sup>13</sup>C NMR and <sup>19</sup>F NMR of 3i

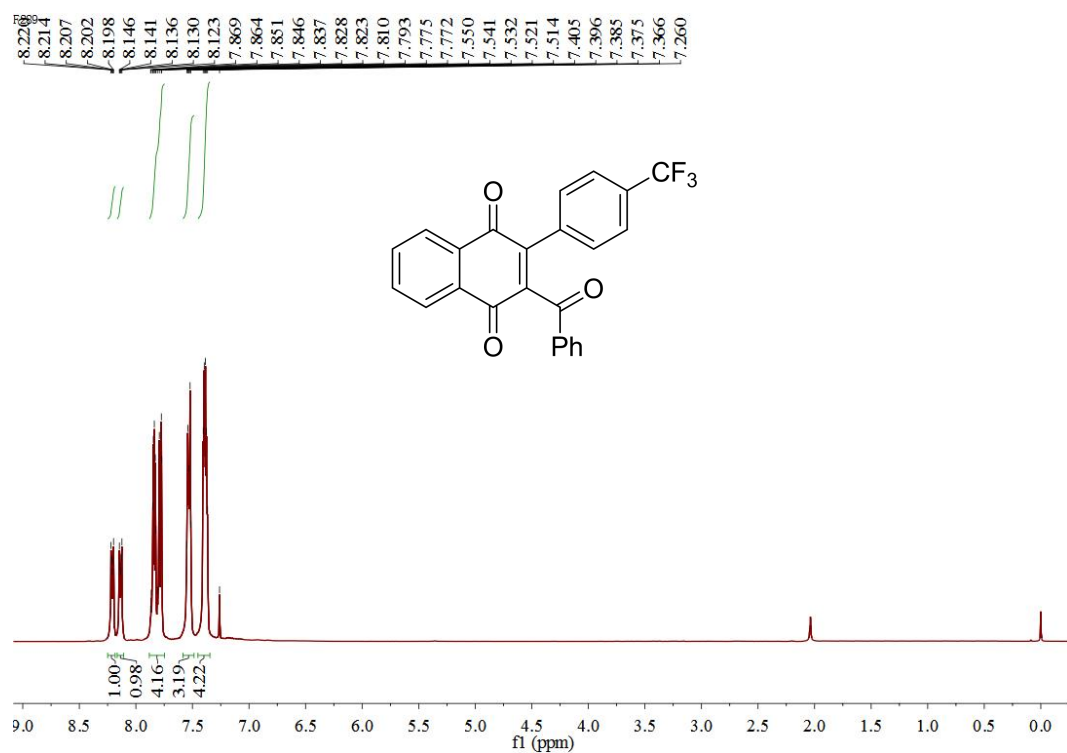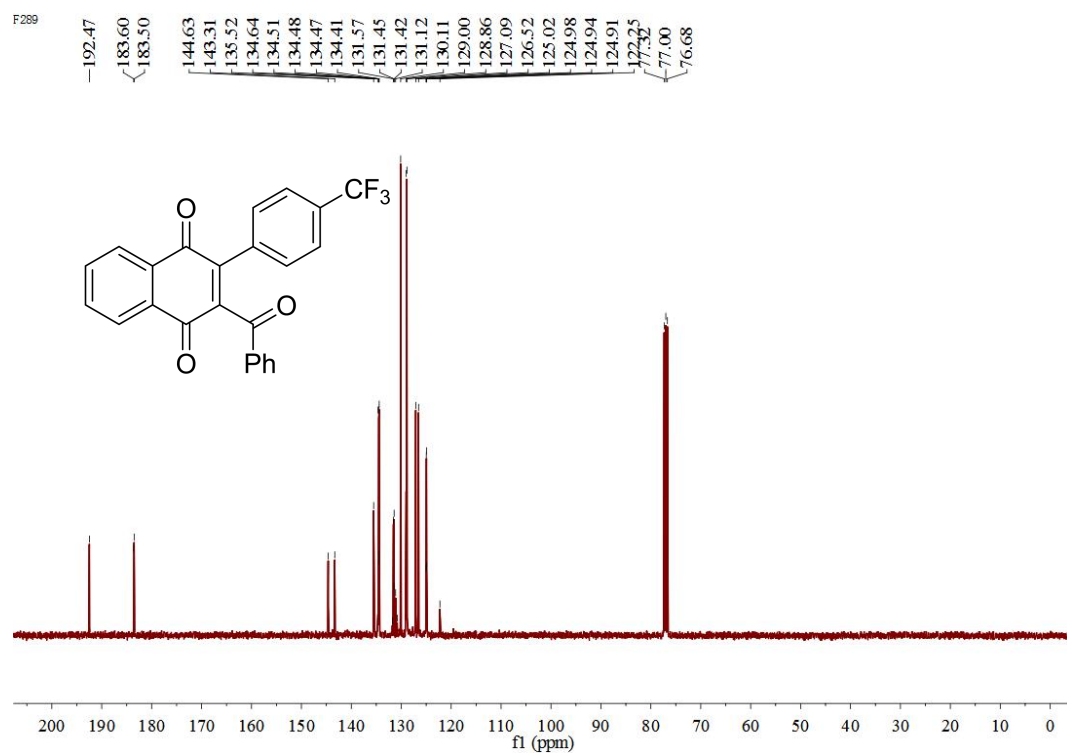

F289

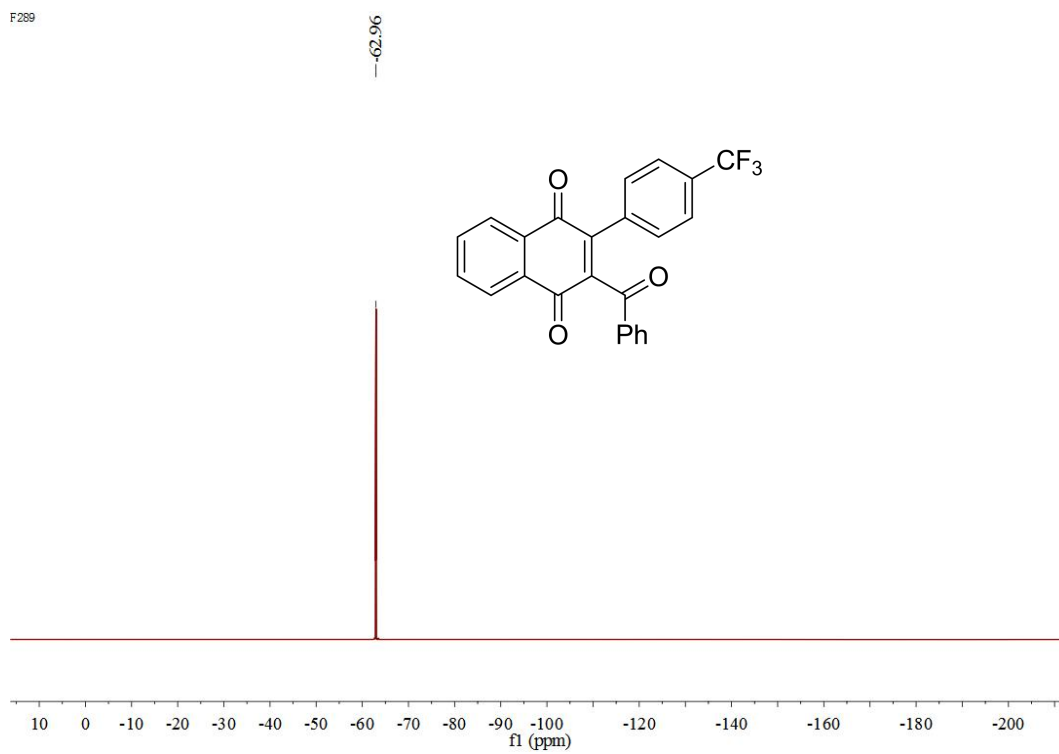

# <sup>1</sup>H NMR and <sup>13</sup>C NMR of 3j

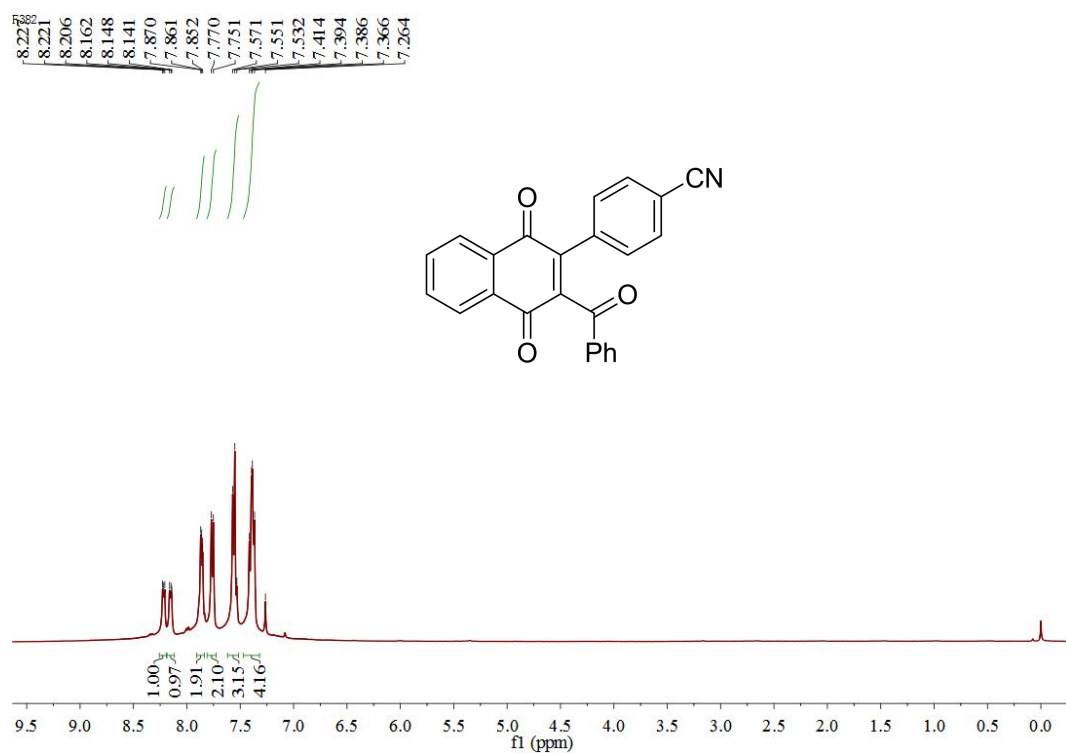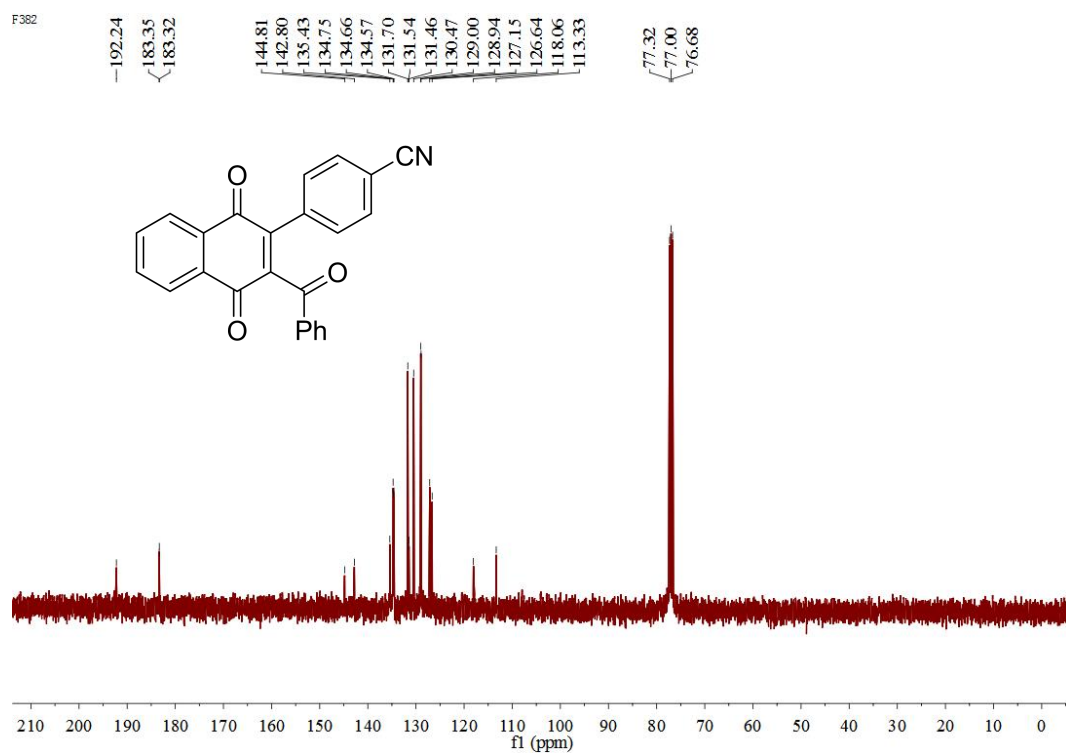

# <sup>1</sup>H NMR and <sup>13</sup>C NMR of 3k

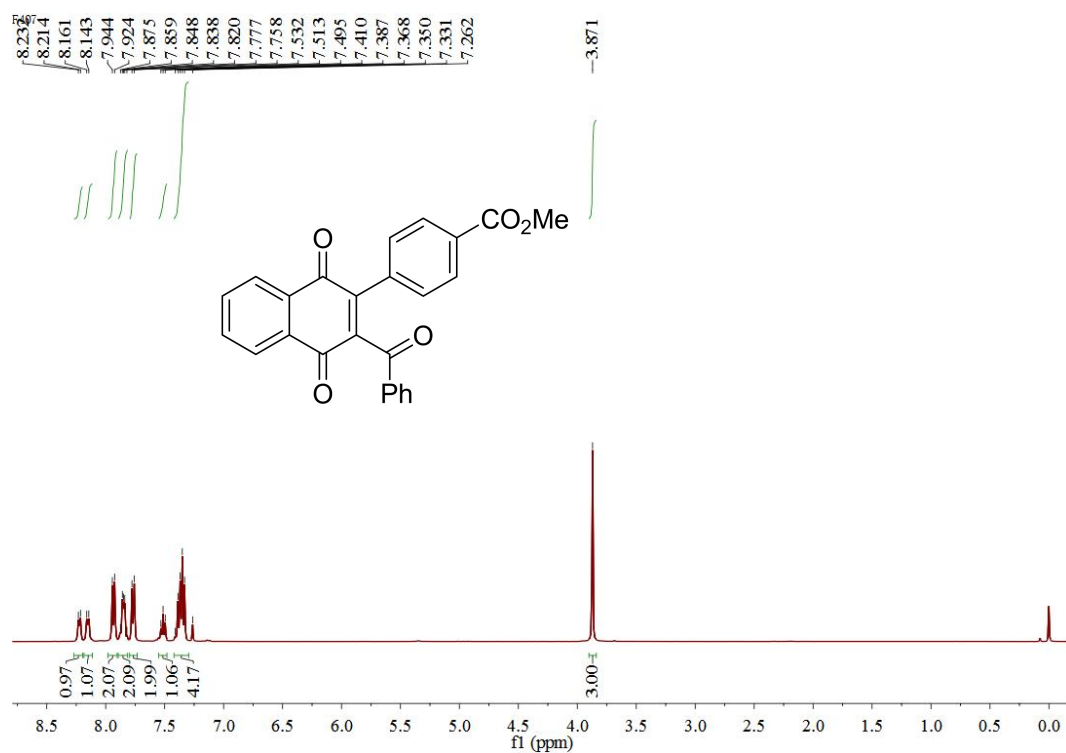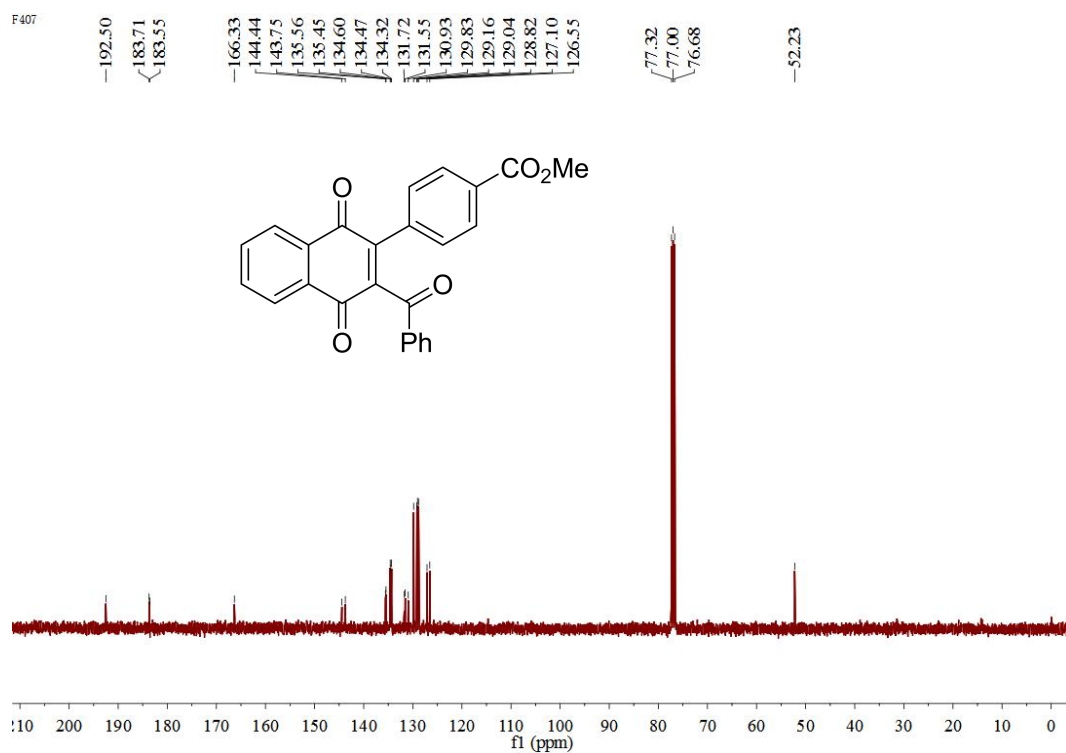

# <sup>1</sup>H NMR, <sup>13</sup>C NMR and <sup>19</sup>F NMR of 3l

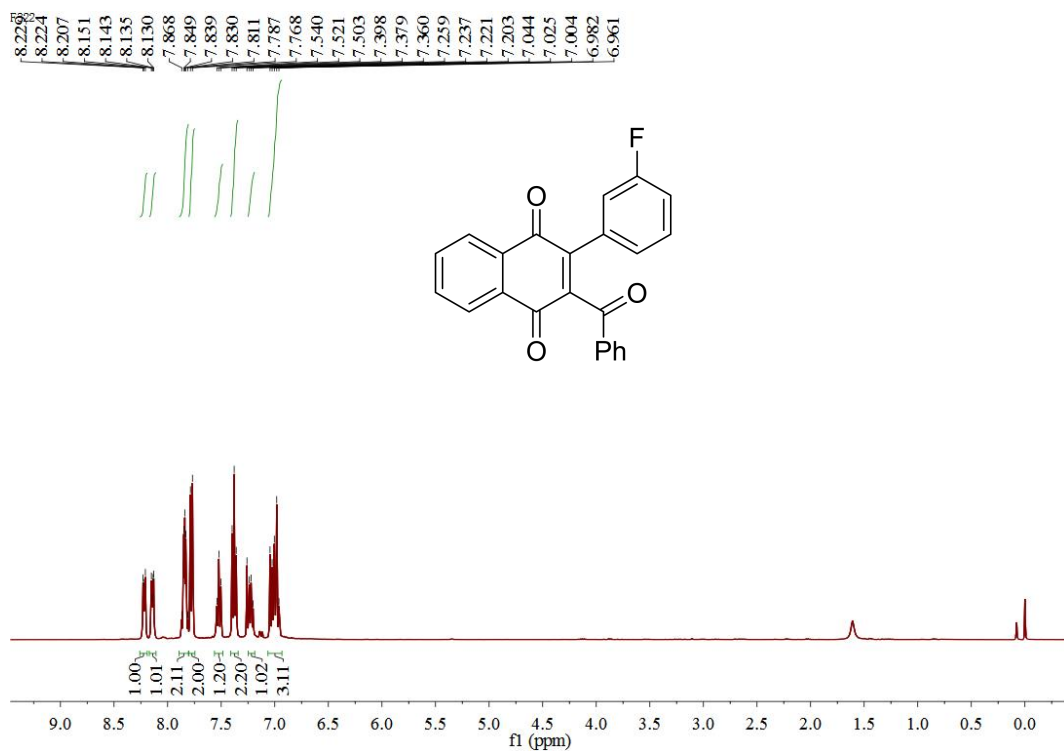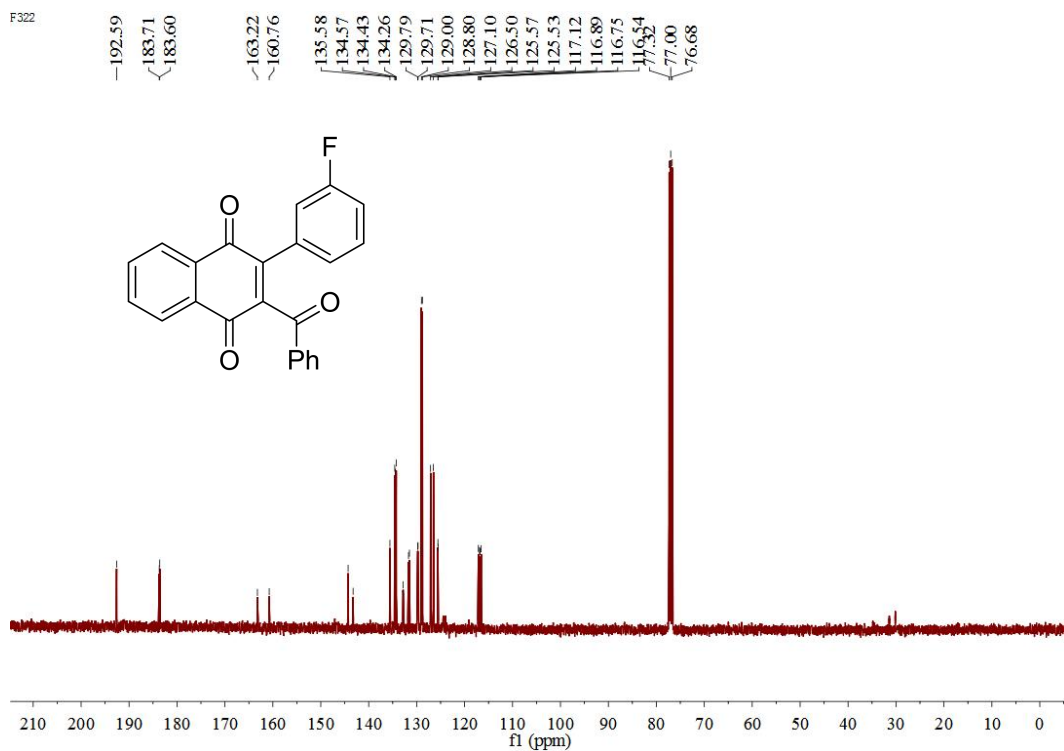

F322

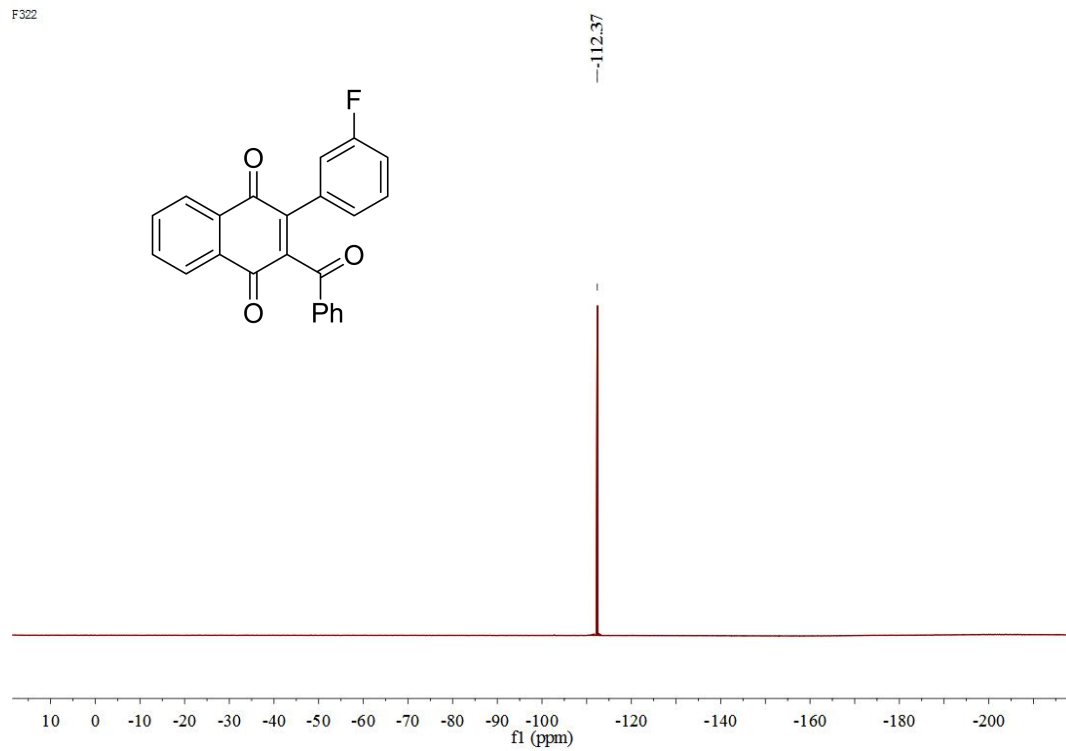

# <sup>1</sup>H NMR, <sup>13</sup>C NMR and <sup>19</sup>F NMR of 3m

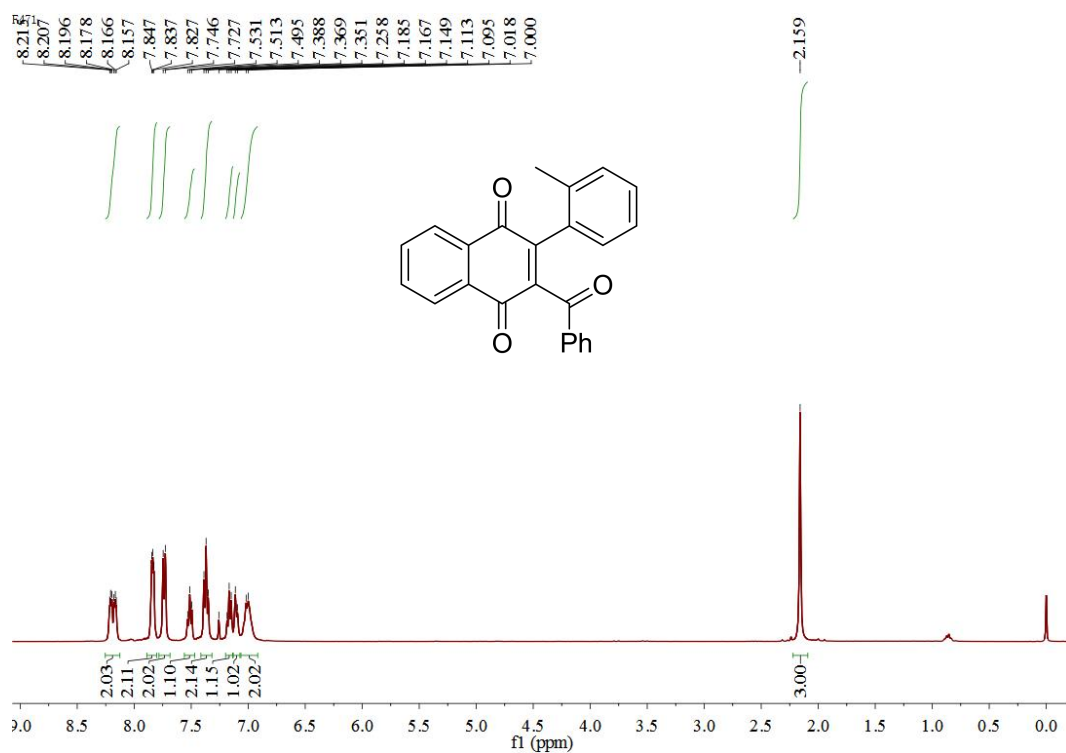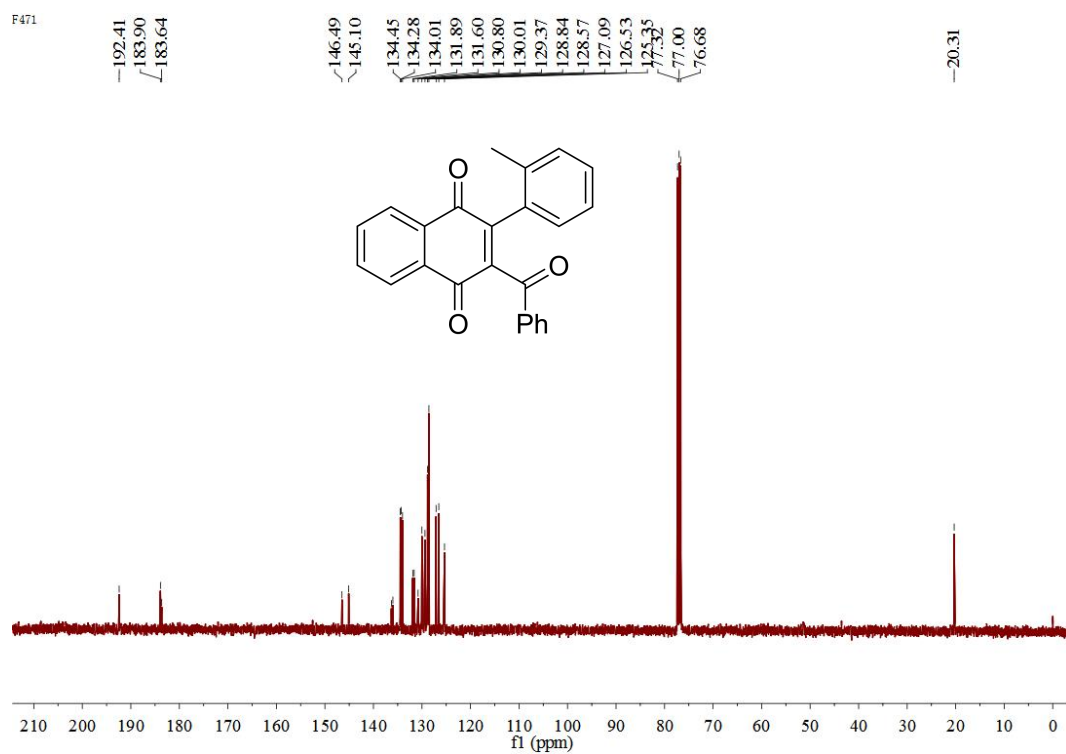

# <sup>1</sup>H NMR, <sup>13</sup>C NMR and <sup>19</sup>F NMR of 3n

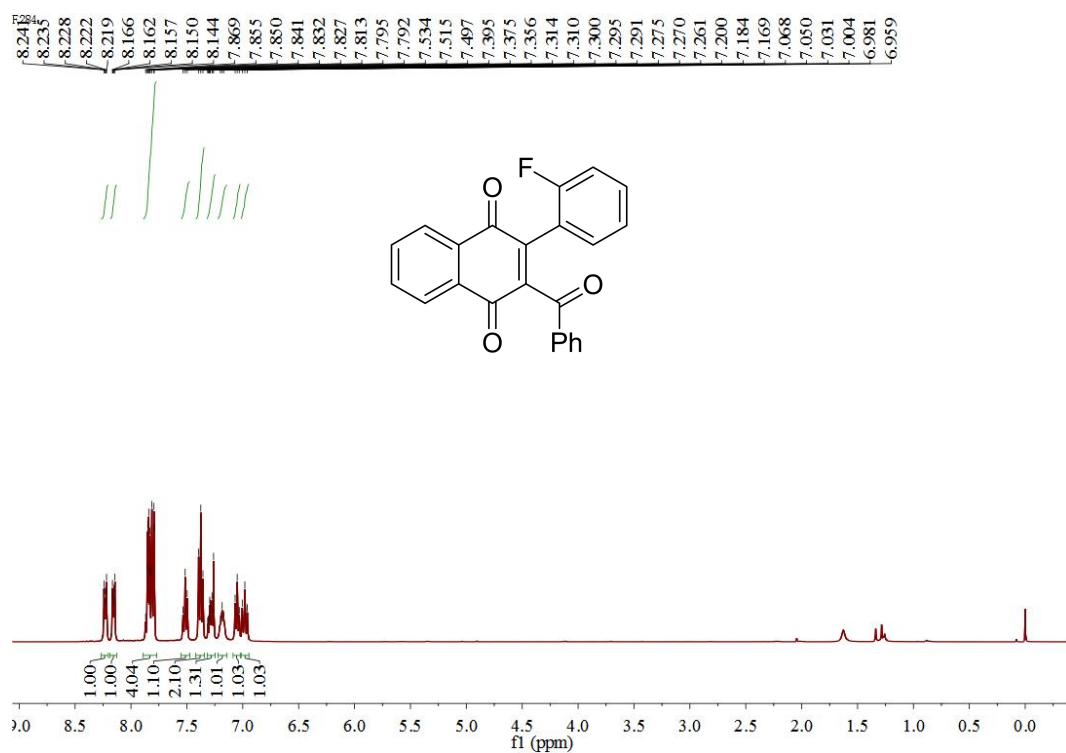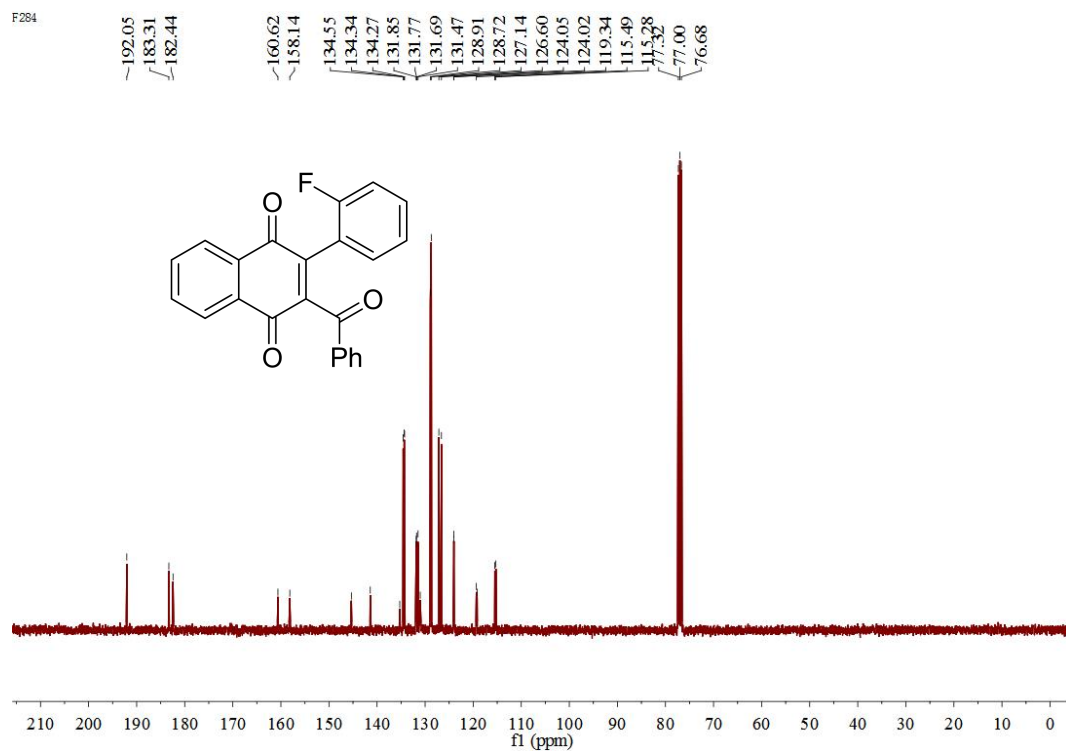

F284

-110.30

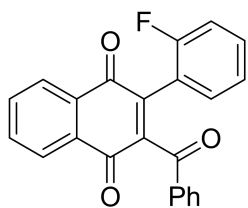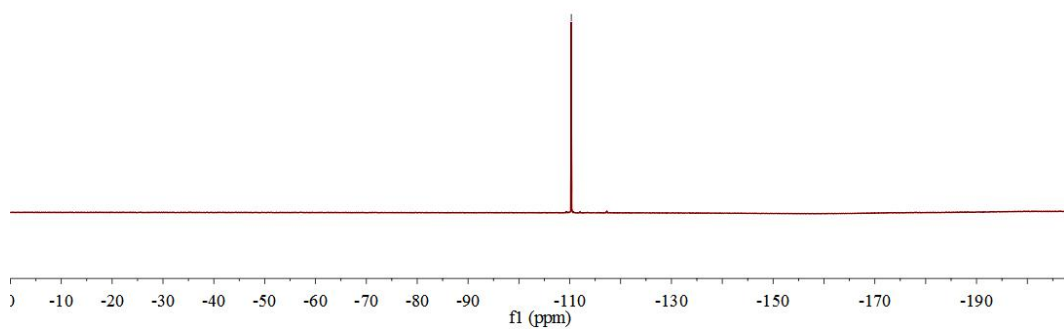

# <sup>1</sup>H NMR and <sup>13</sup>C NMR of 3o

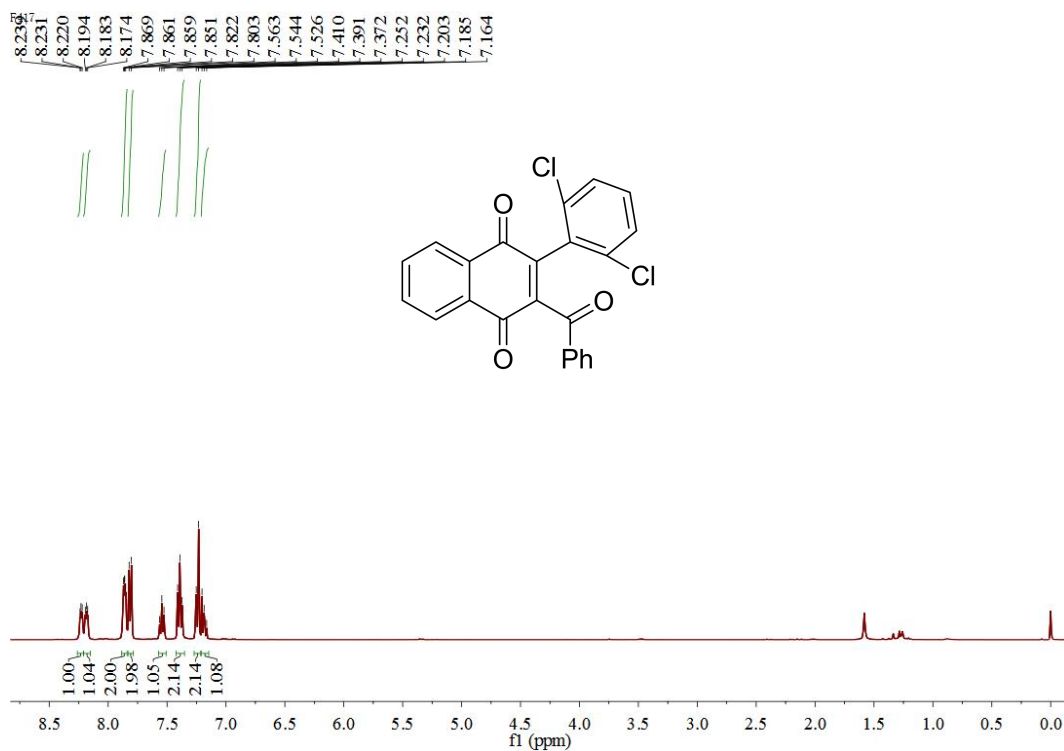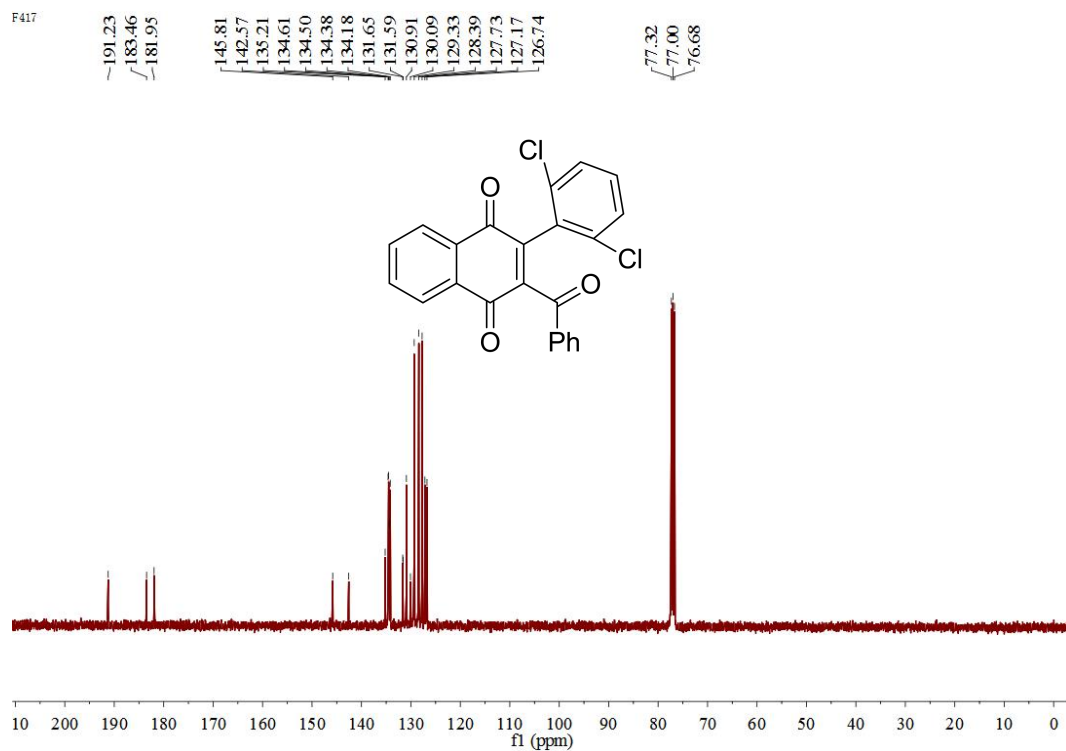

# <sup>1</sup>H NMR, <sup>13</sup>C NMR and <sup>19</sup>F NMR of 3p

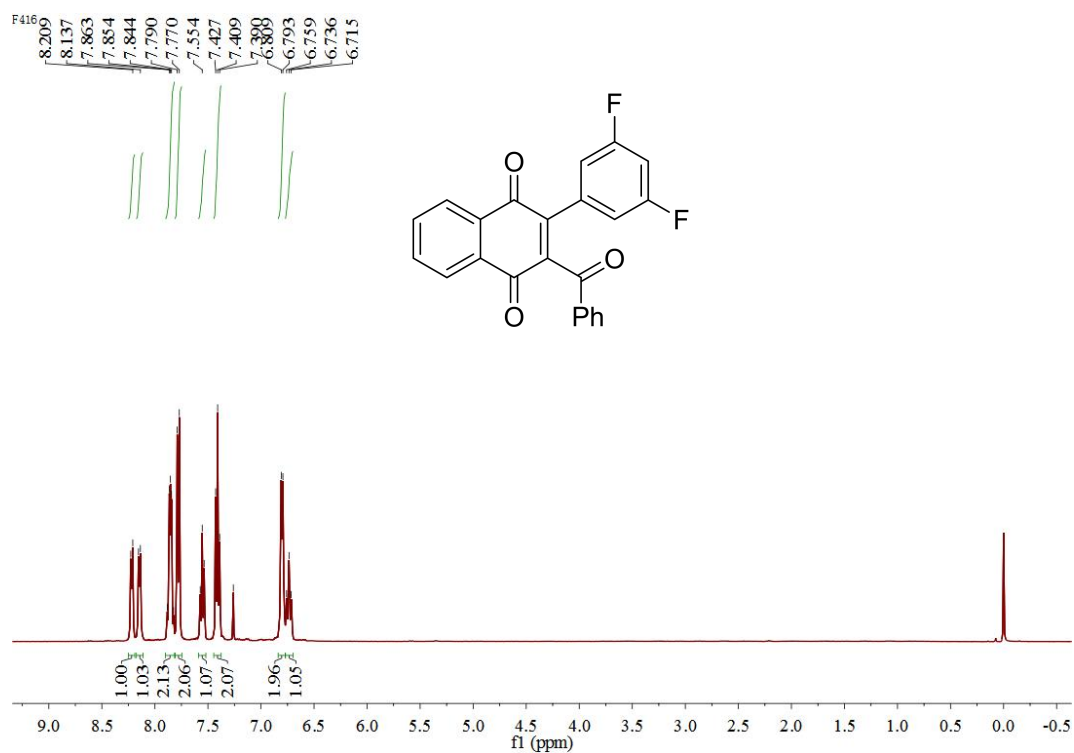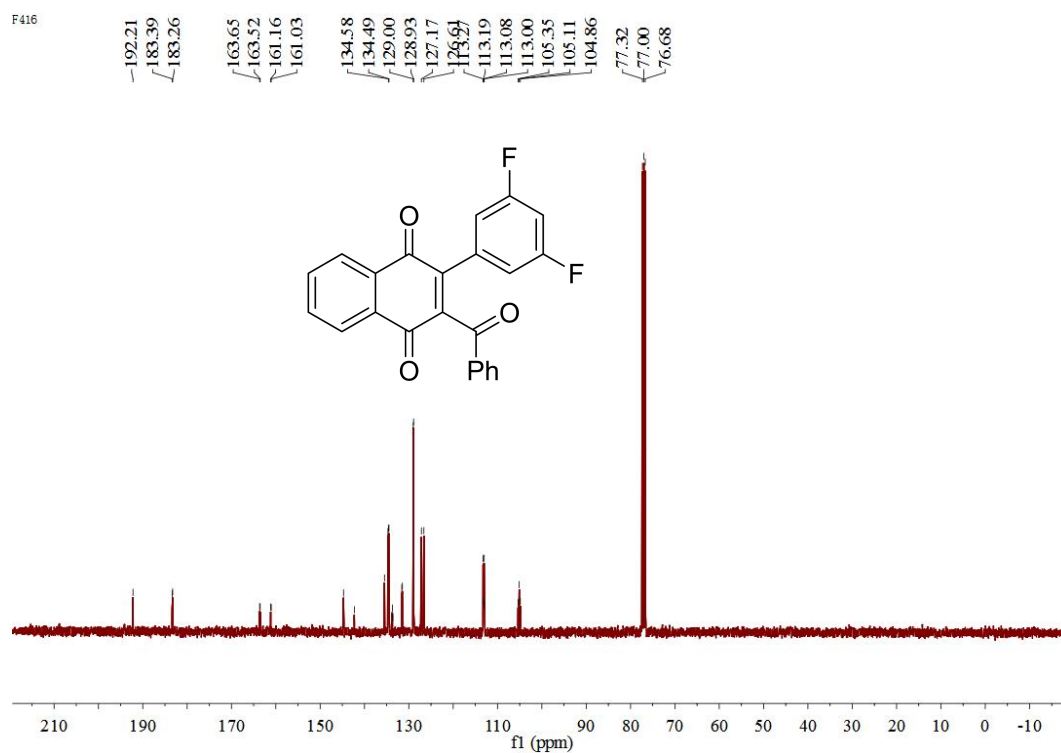

F416

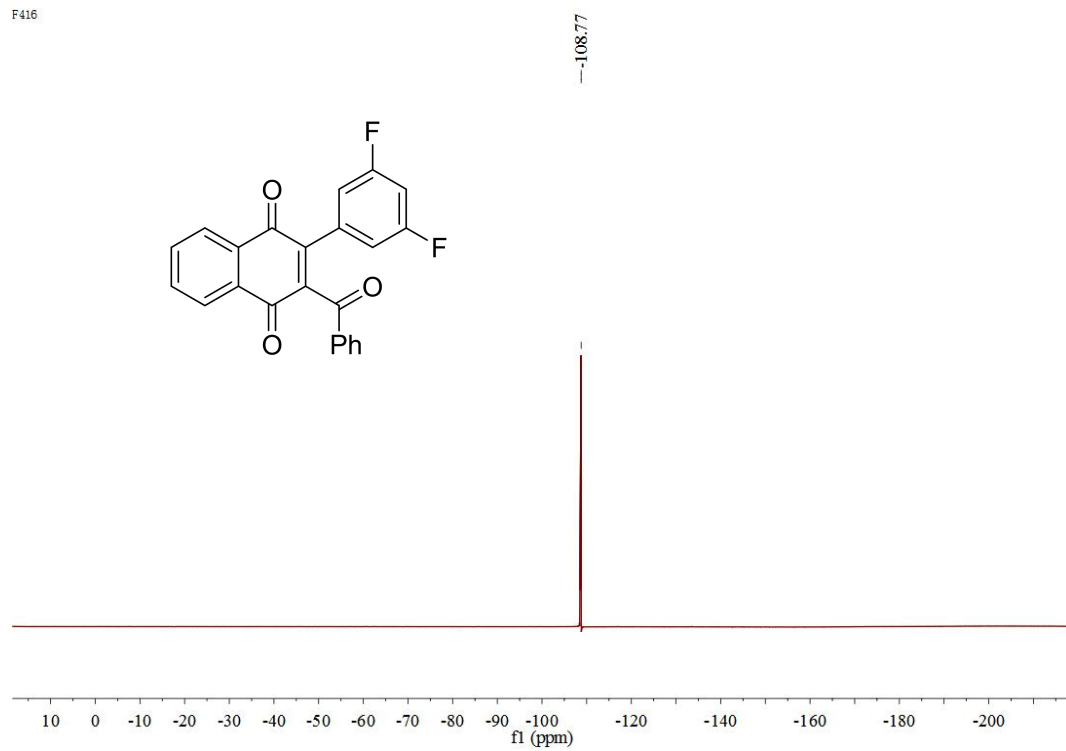

# <sup>1</sup>H NMR and <sup>13</sup>C NMR of 3q

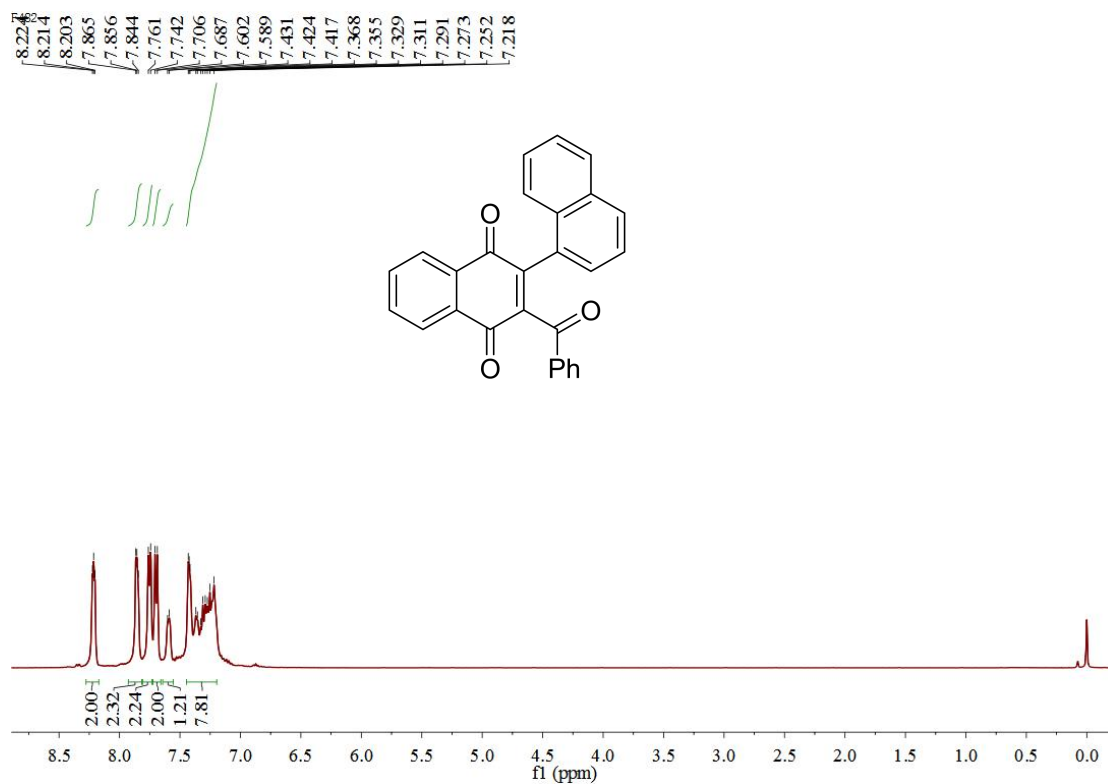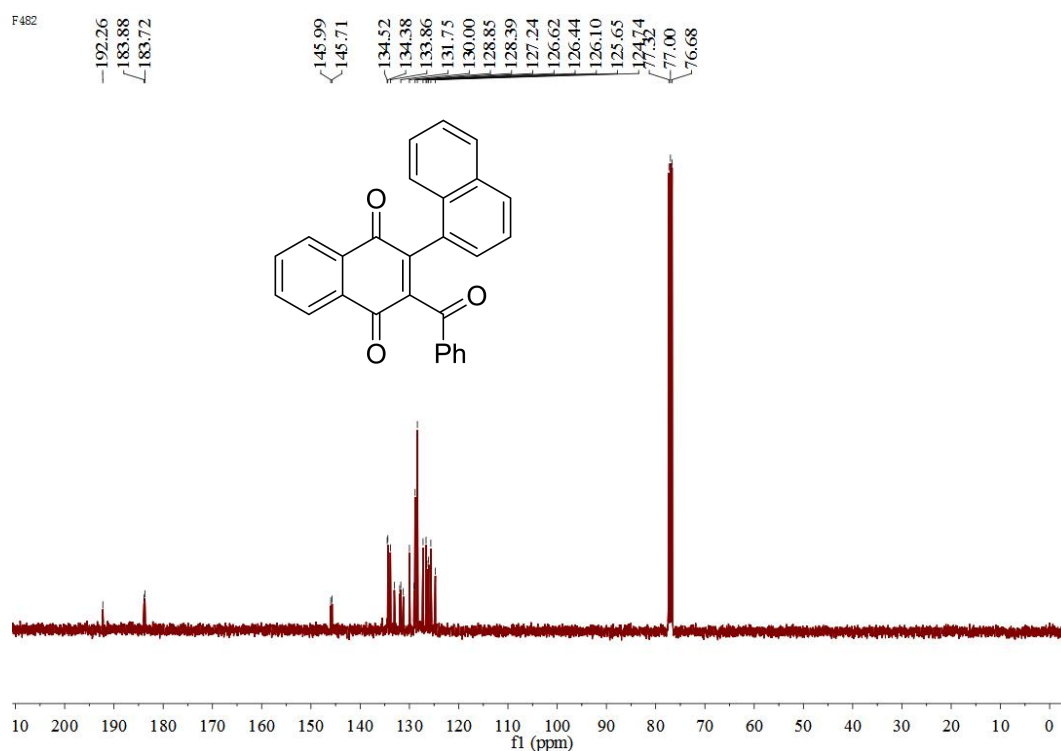

# <sup>1</sup>H NMR and <sup>13</sup>C NMR of 3r

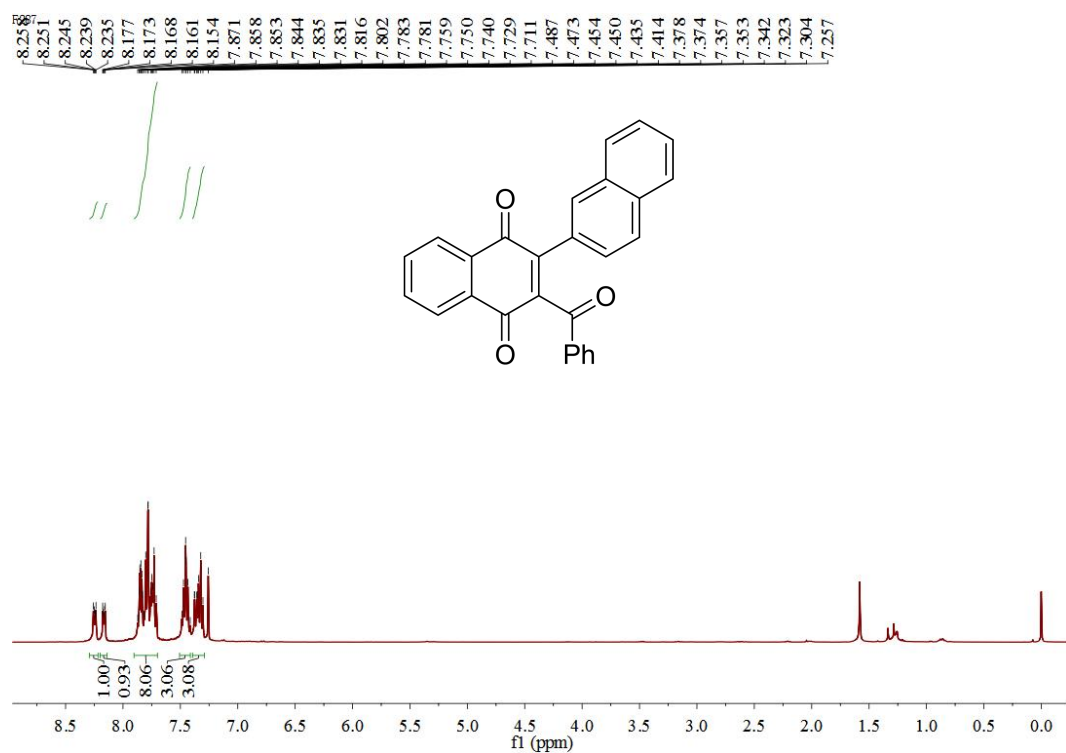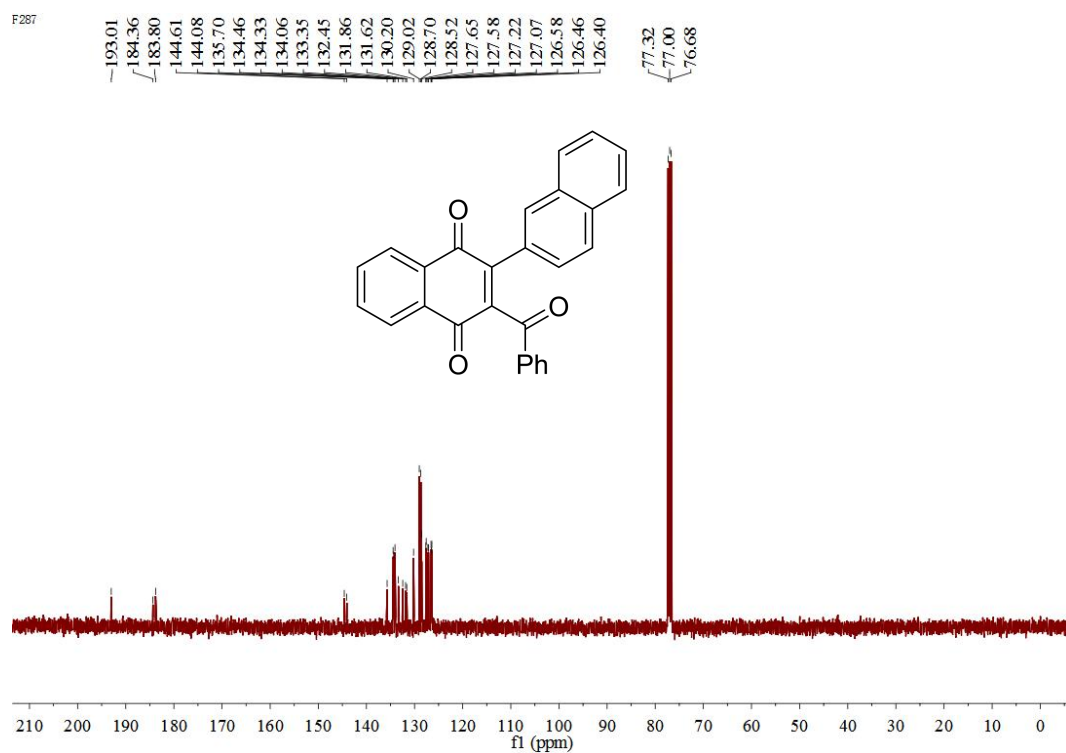

# <sup>1</sup>H NMR and <sup>13</sup>C NMR of 4a

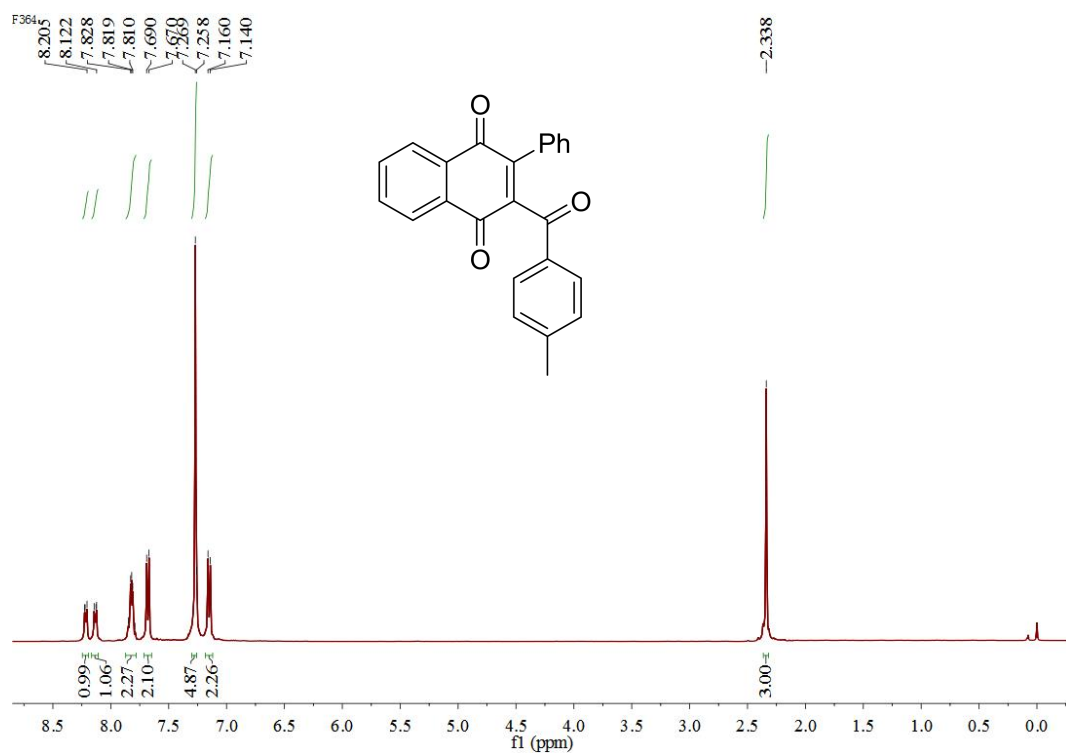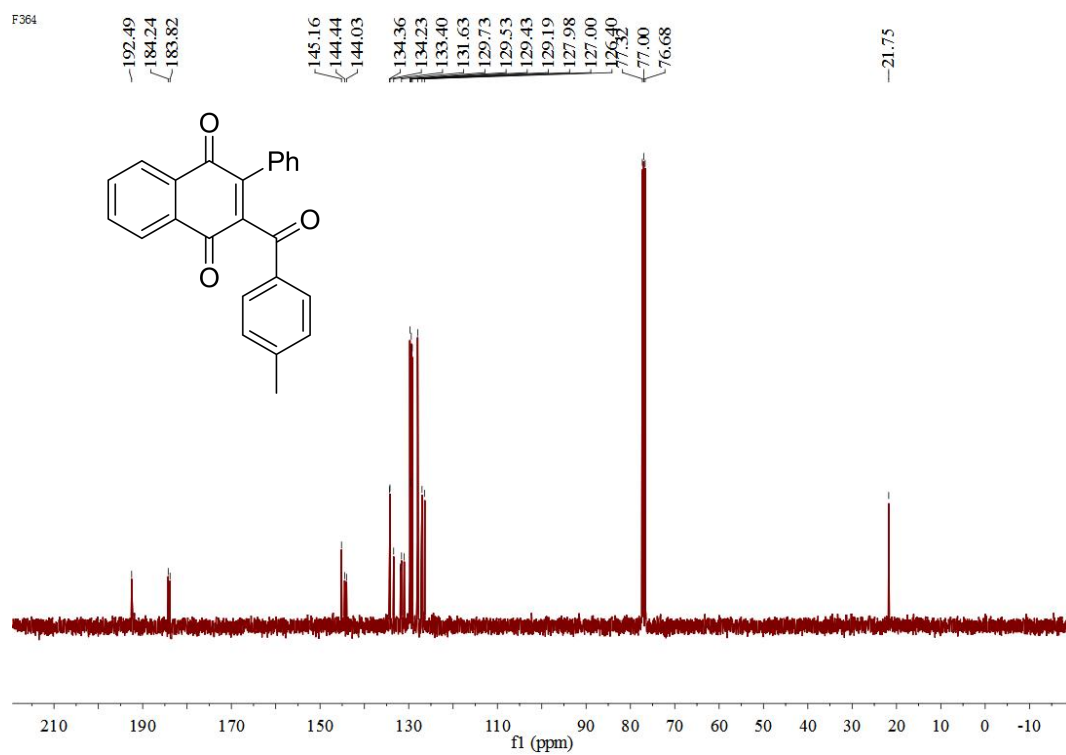

# <sup>1</sup>H NMR and <sup>13</sup>C NMR of 4b

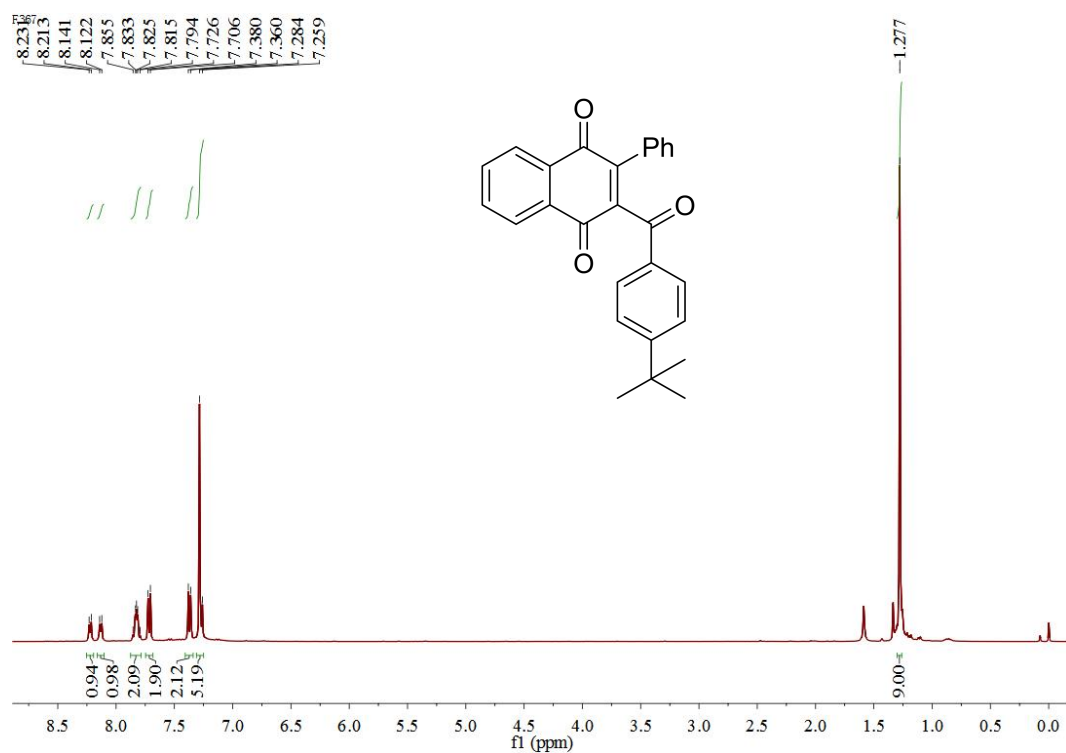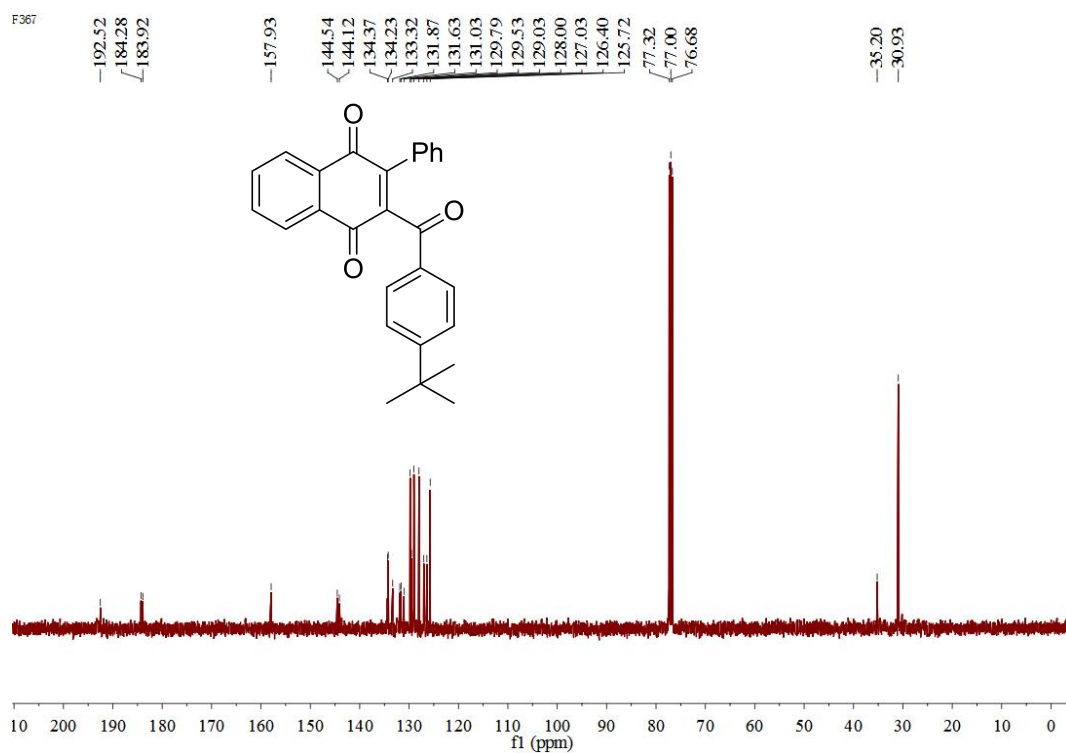

# <sup>1</sup>H NMR and <sup>13</sup>C NMR of 4c

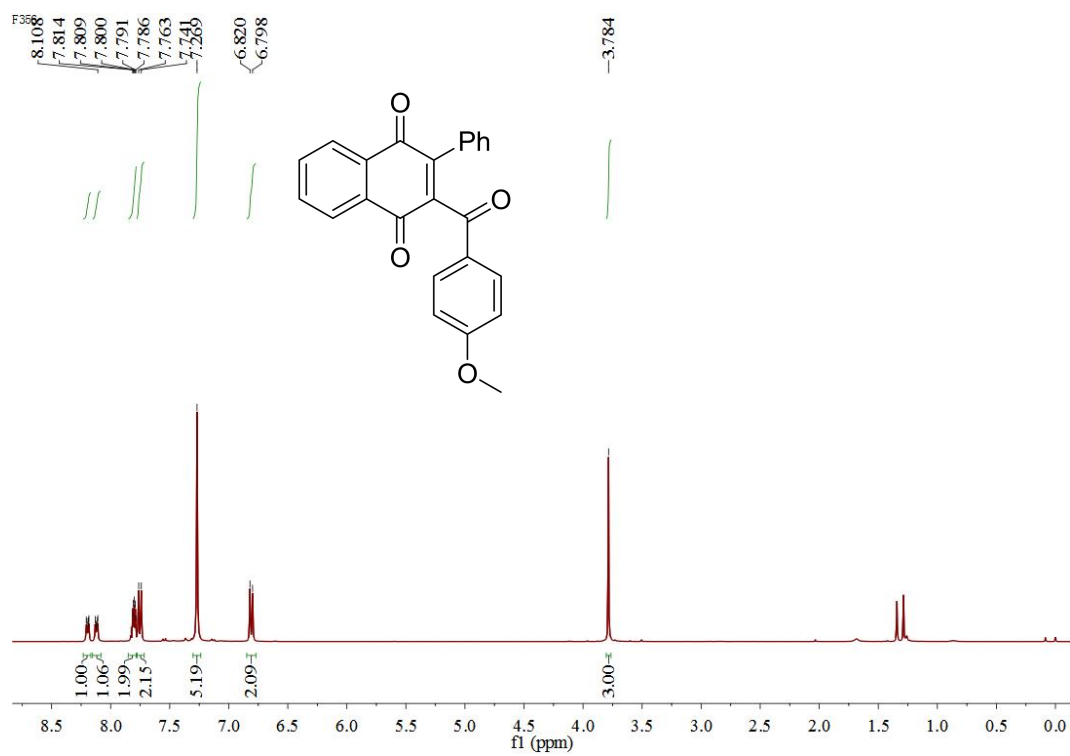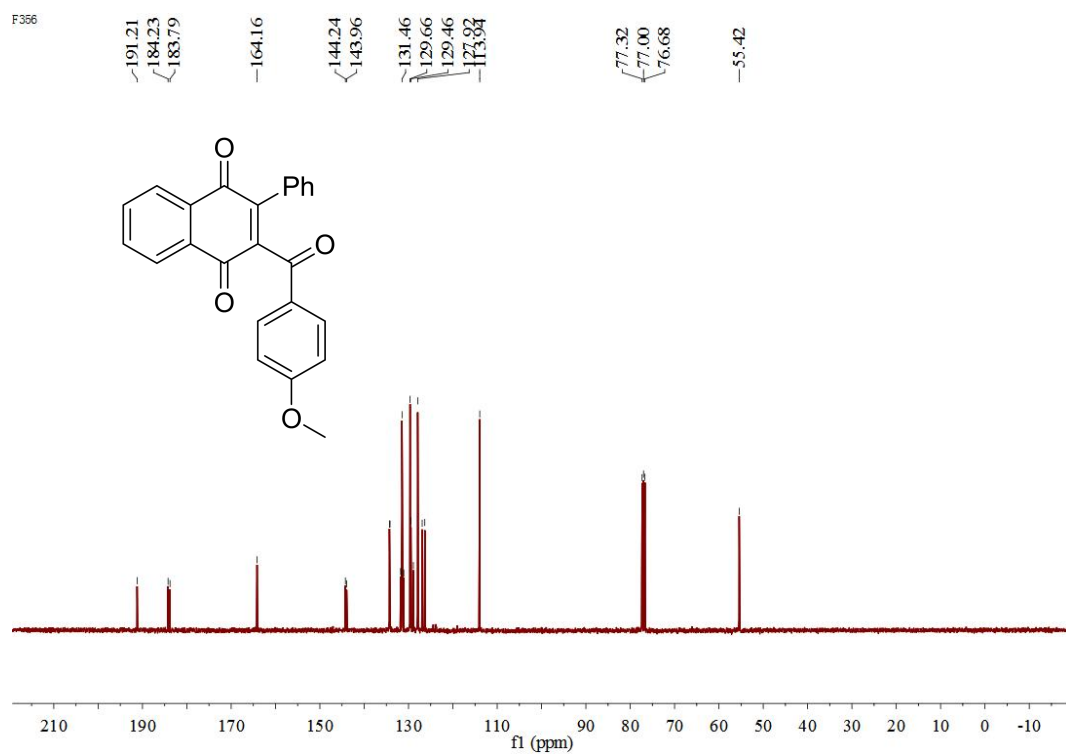

# <sup>1</sup>H NMR and <sup>13</sup>C NMR of 4d

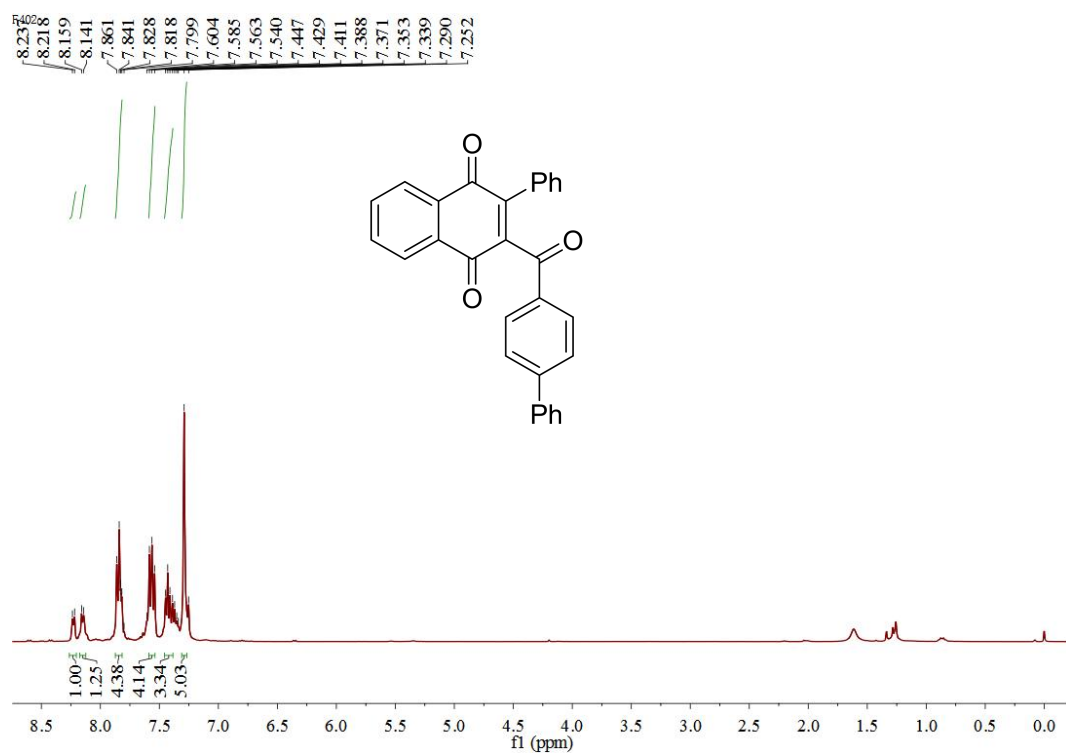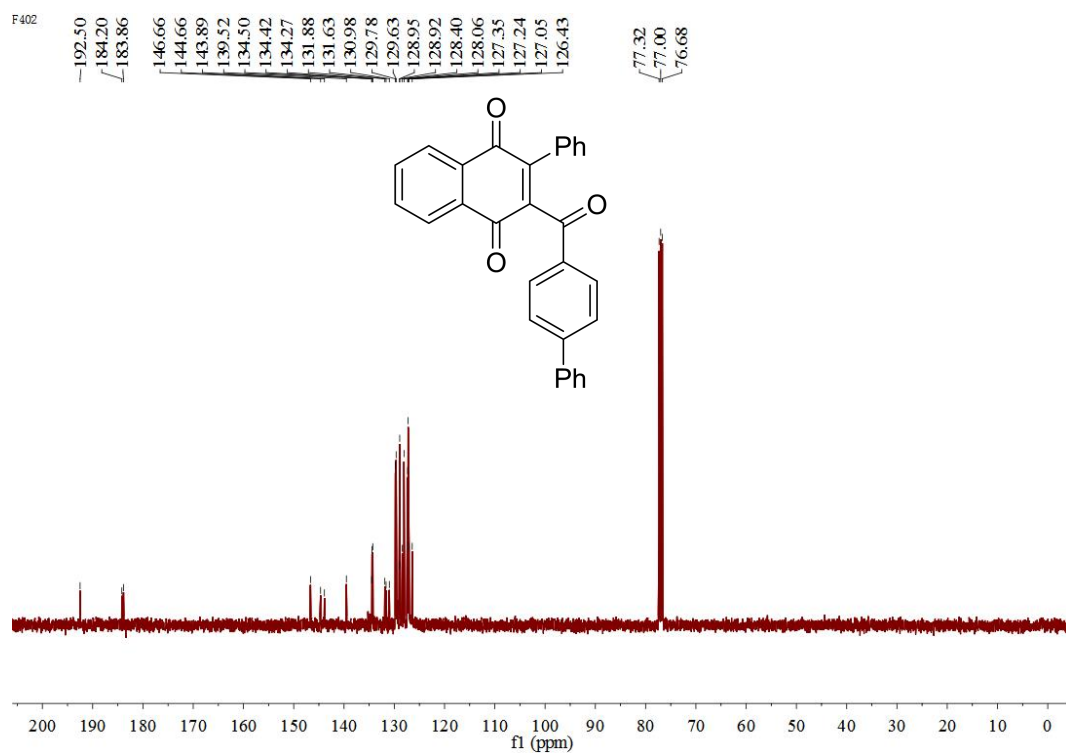

# <sup>1</sup>H NMR and <sup>13</sup>C NMR of 4e

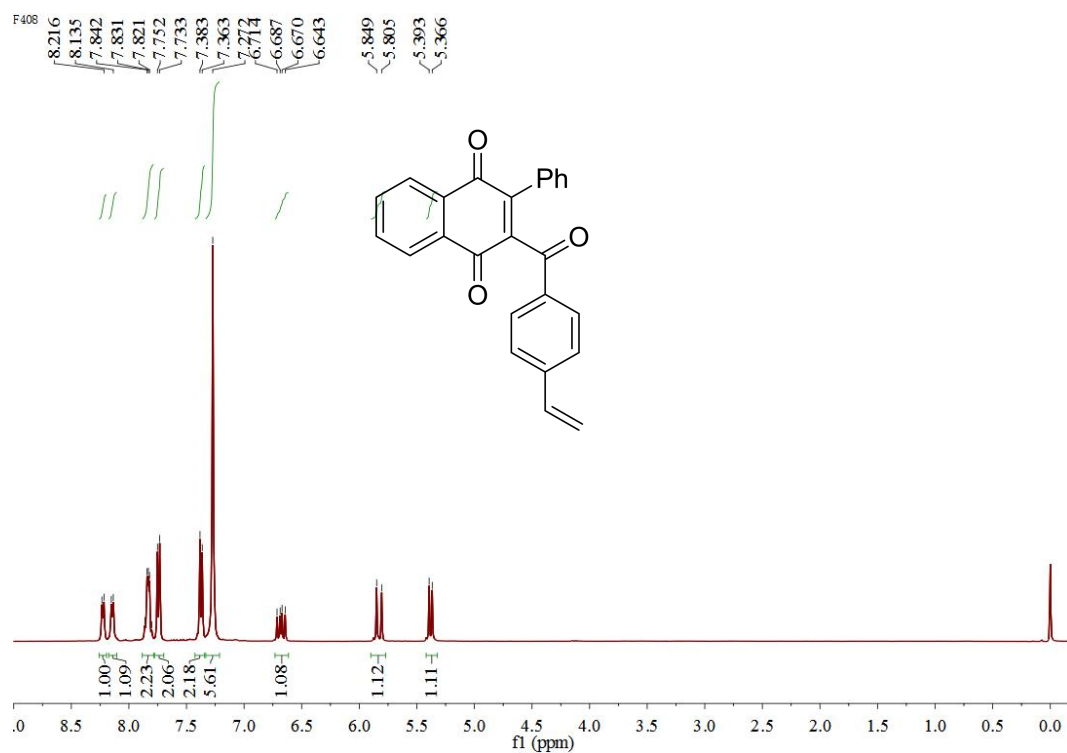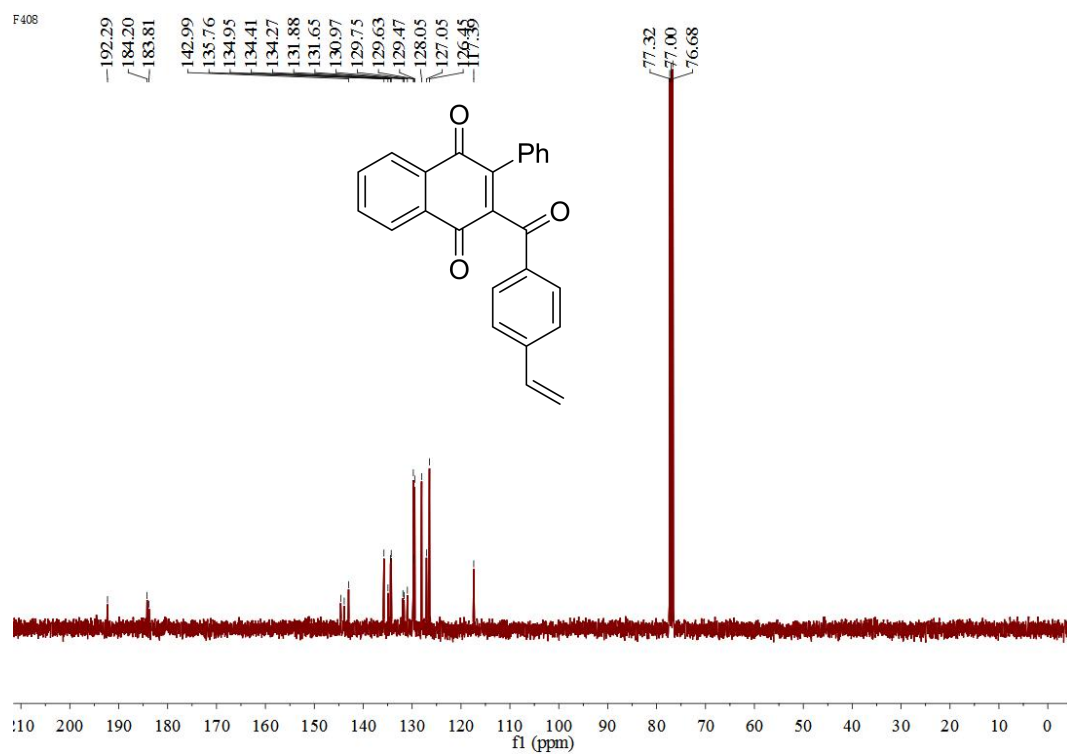

# <sup>1</sup>H NMR, <sup>13</sup>C NMR and <sup>19</sup>F NMR of 4f

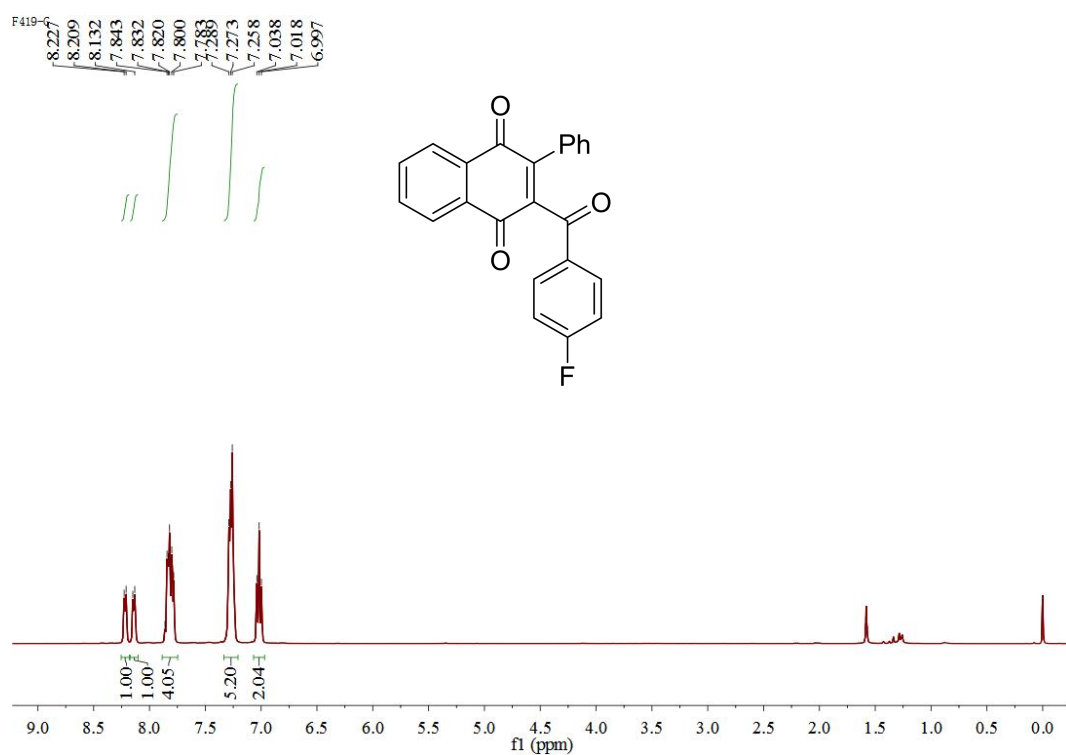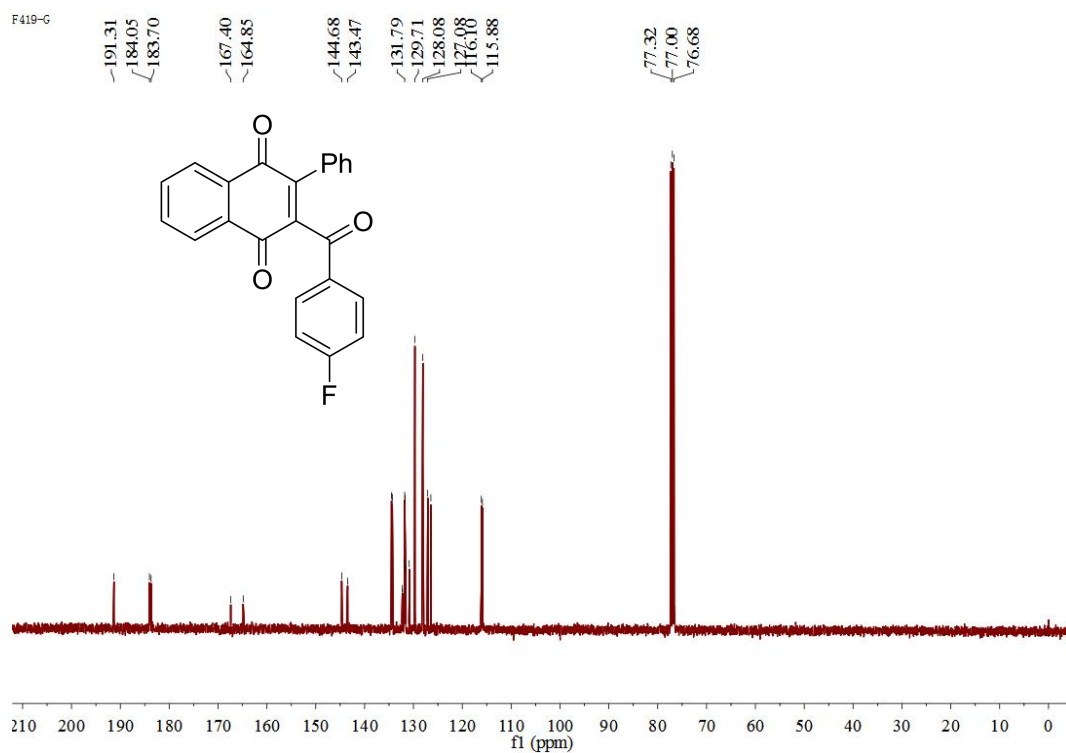

F419-G

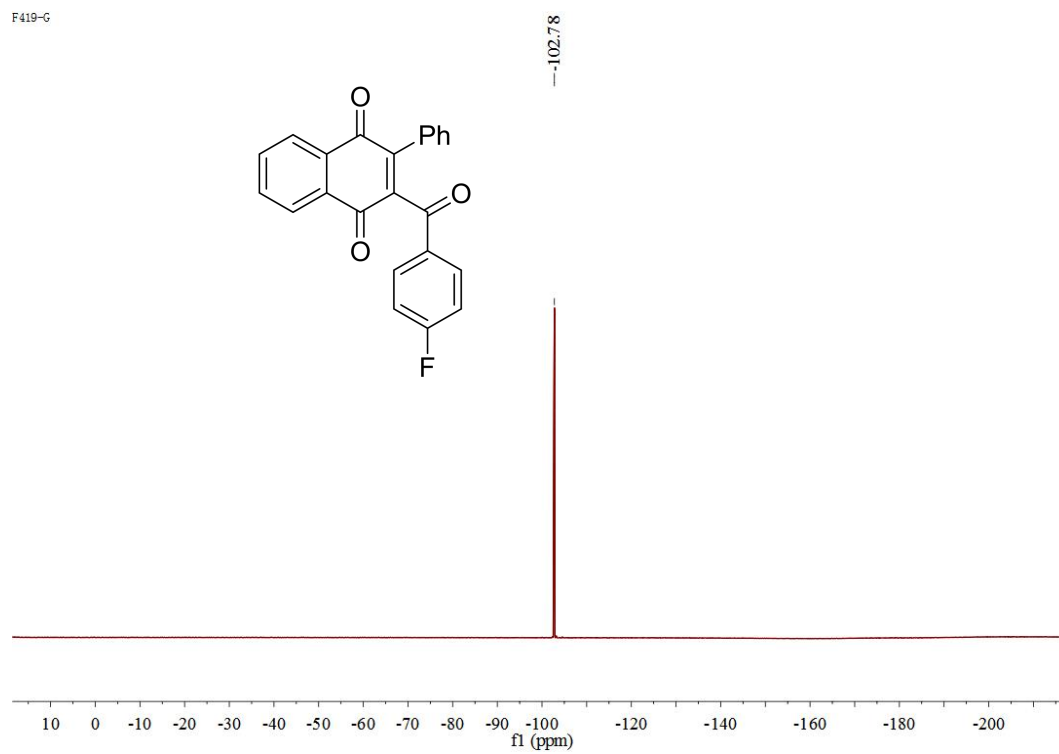

# <sup>1</sup>H NMR and <sup>13</sup>C NMR of 4g

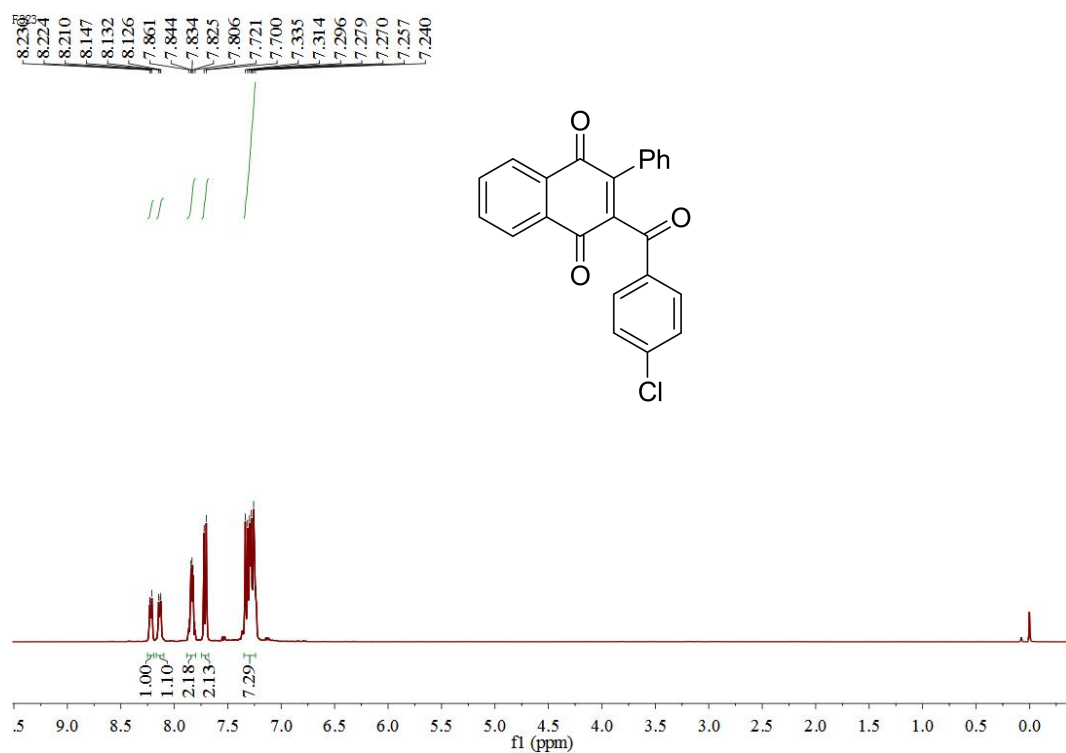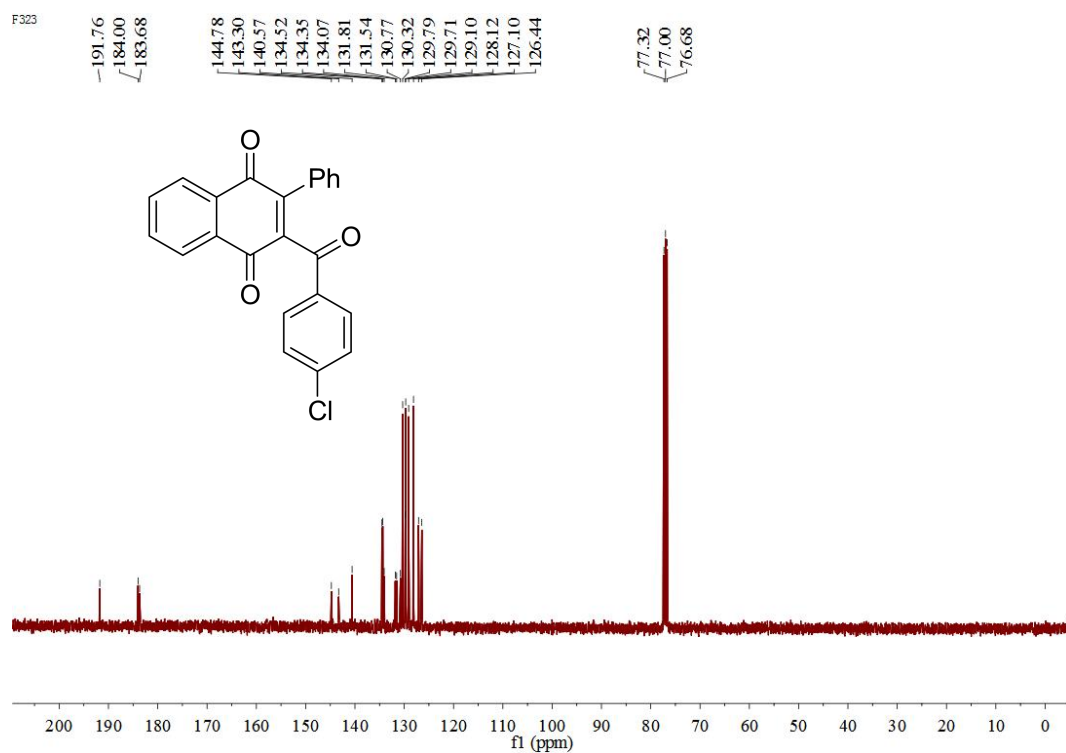

# <sup>1</sup>H NMR and <sup>13</sup>C NMR of 4h

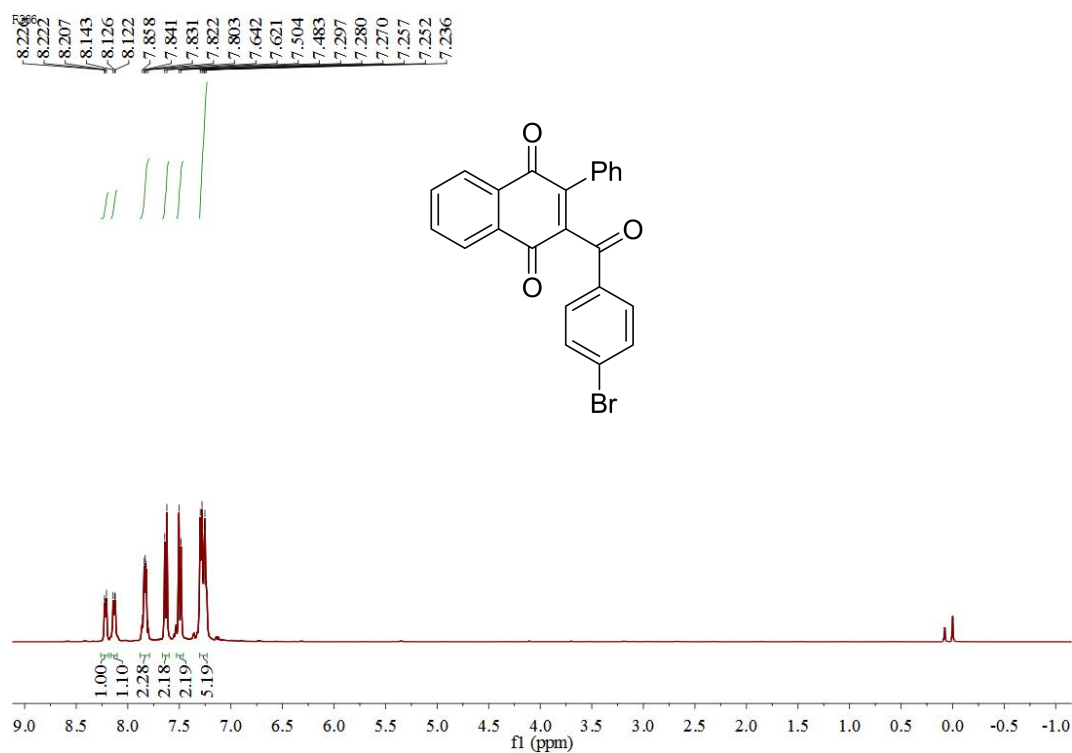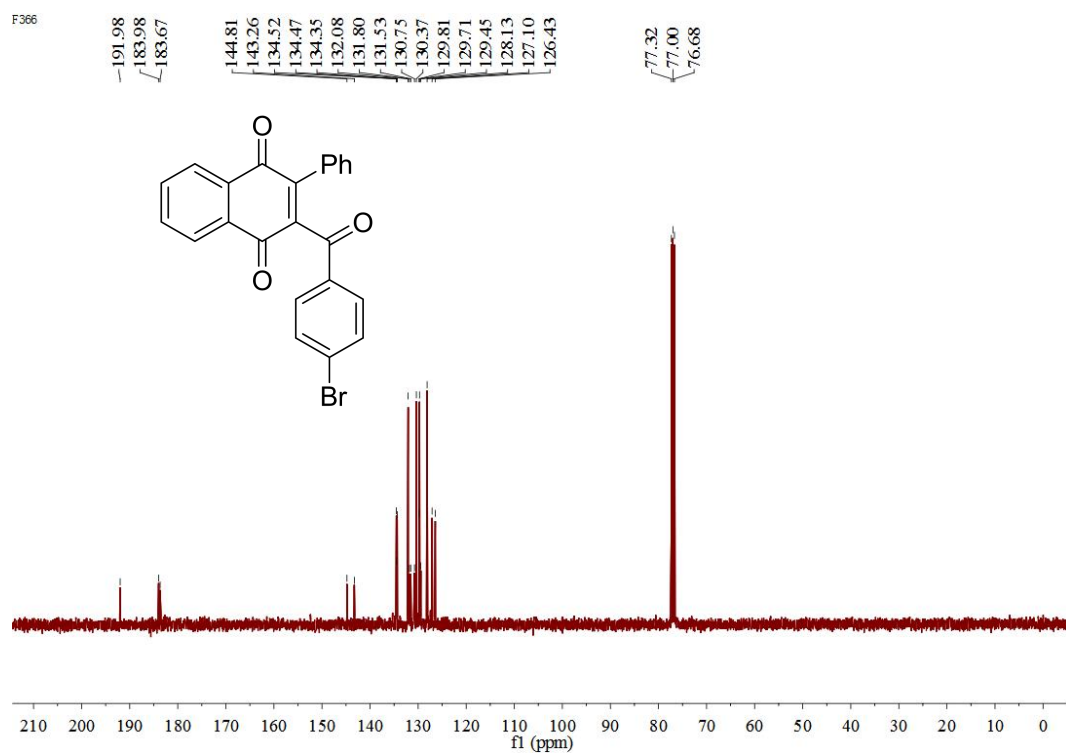

# <sup>1</sup>H NMR and <sup>13</sup>C NMR of 4i

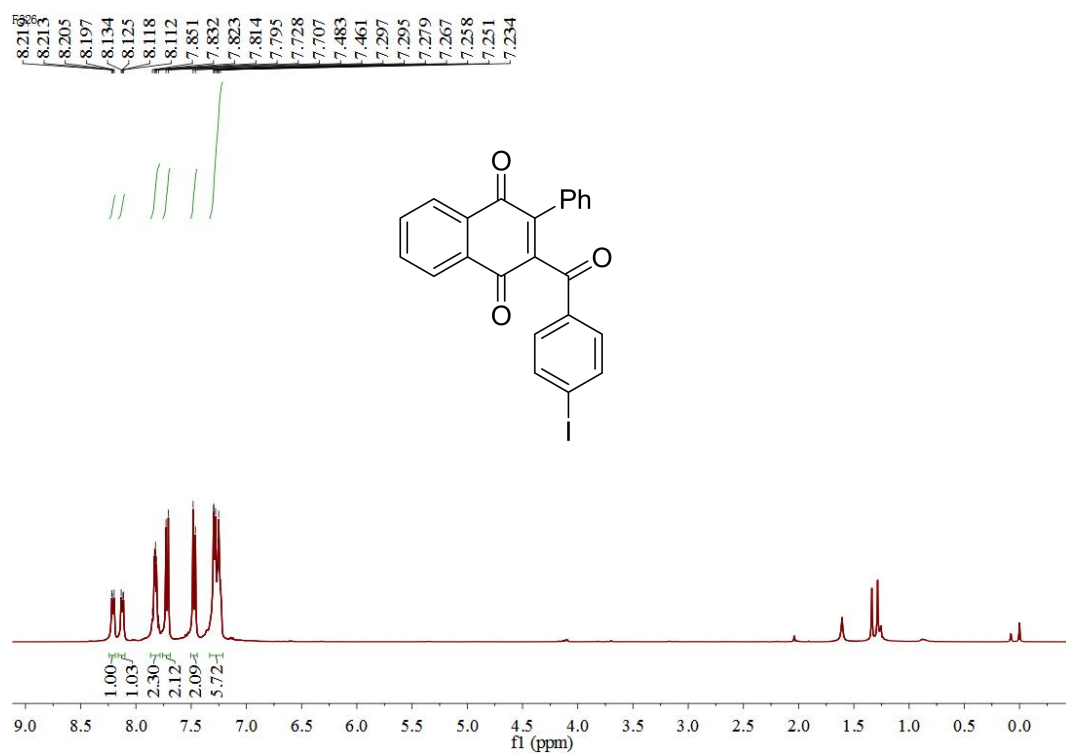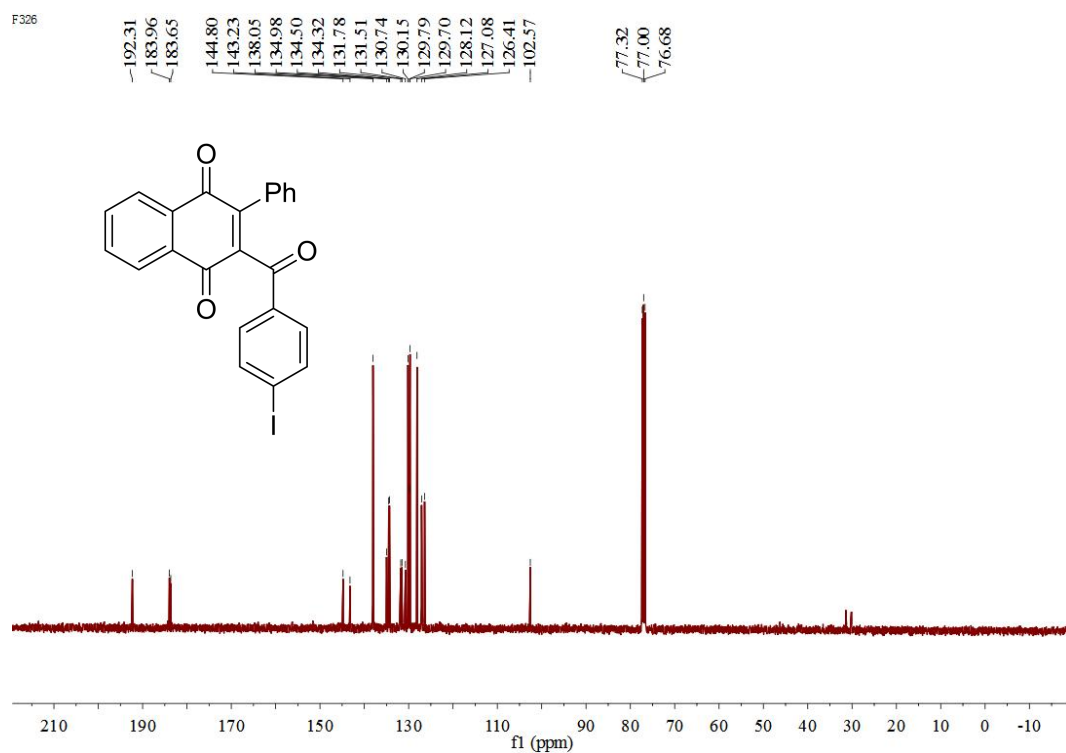

**$^1\text{H}$  NMR,  $^{13}\text{C}$  NMR and  $^{19}\text{F}$  NMR of 4j**

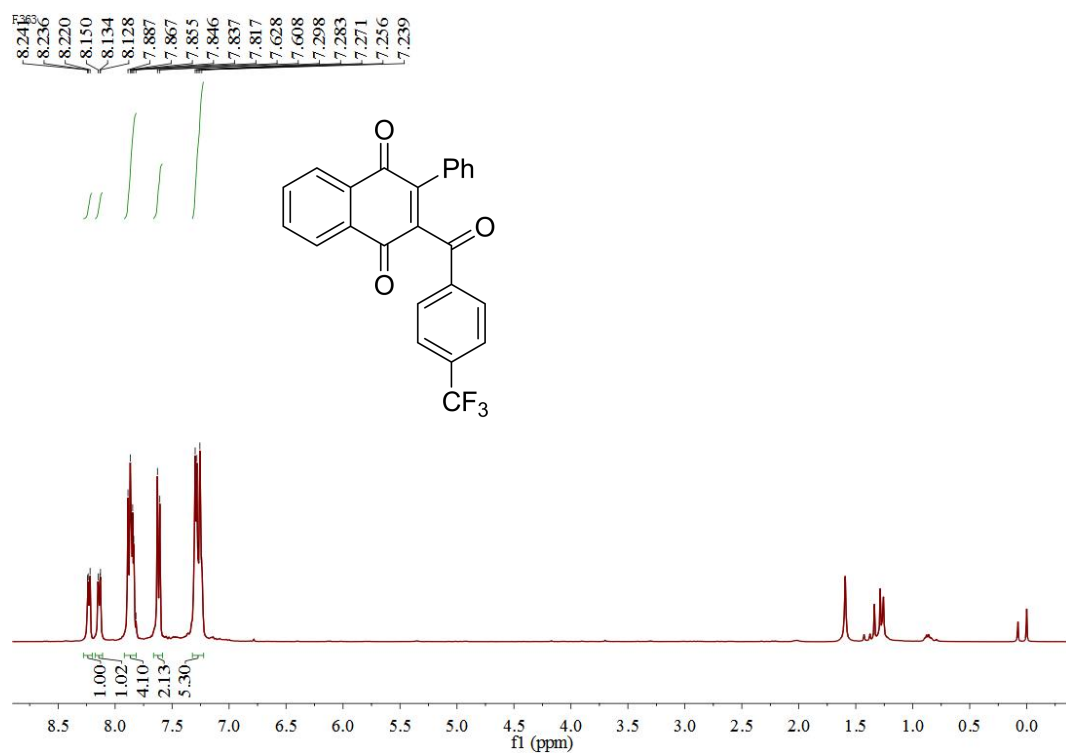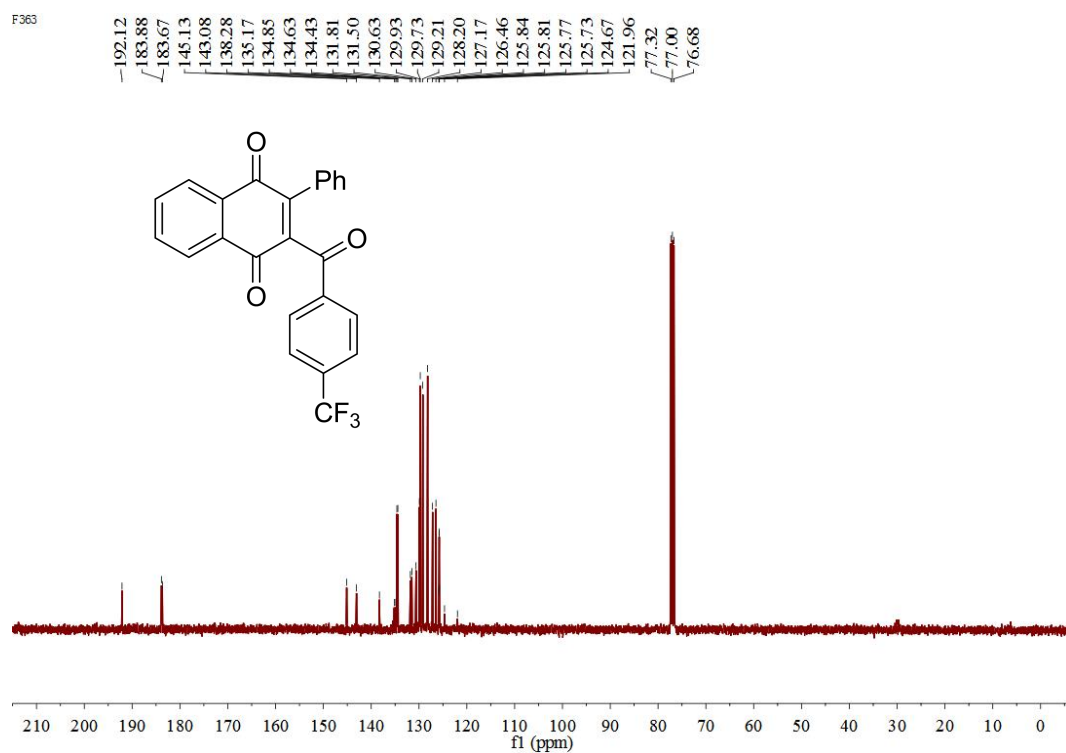

F363

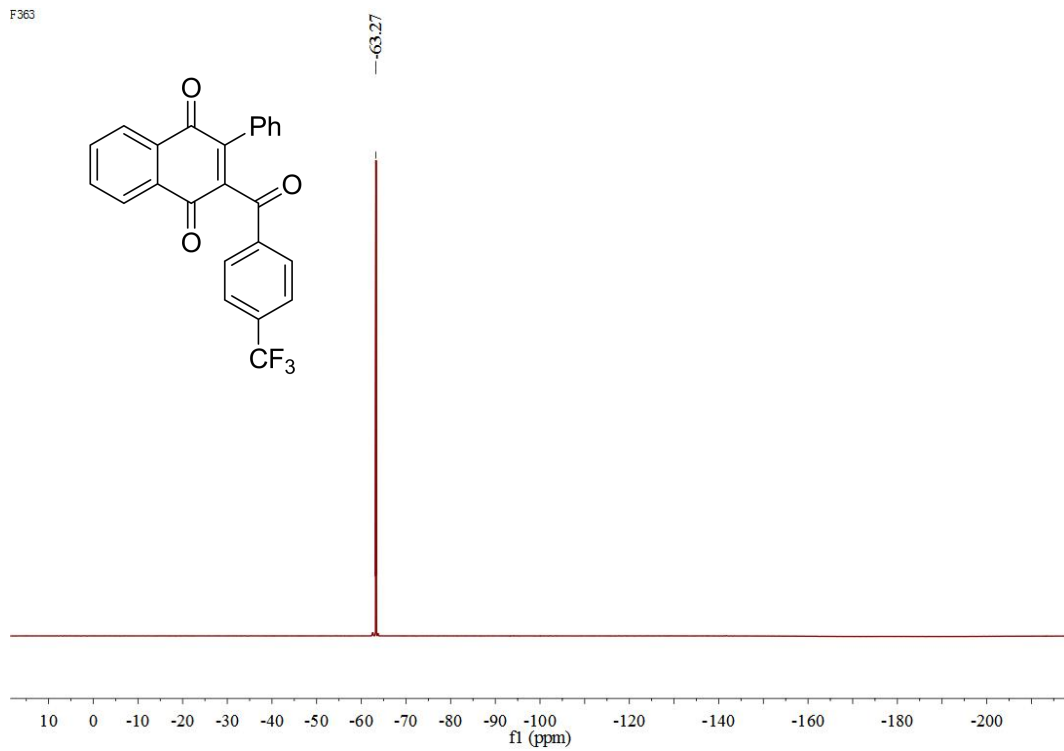

# <sup>1</sup>H NMR and <sup>13</sup>C NMR of 4k

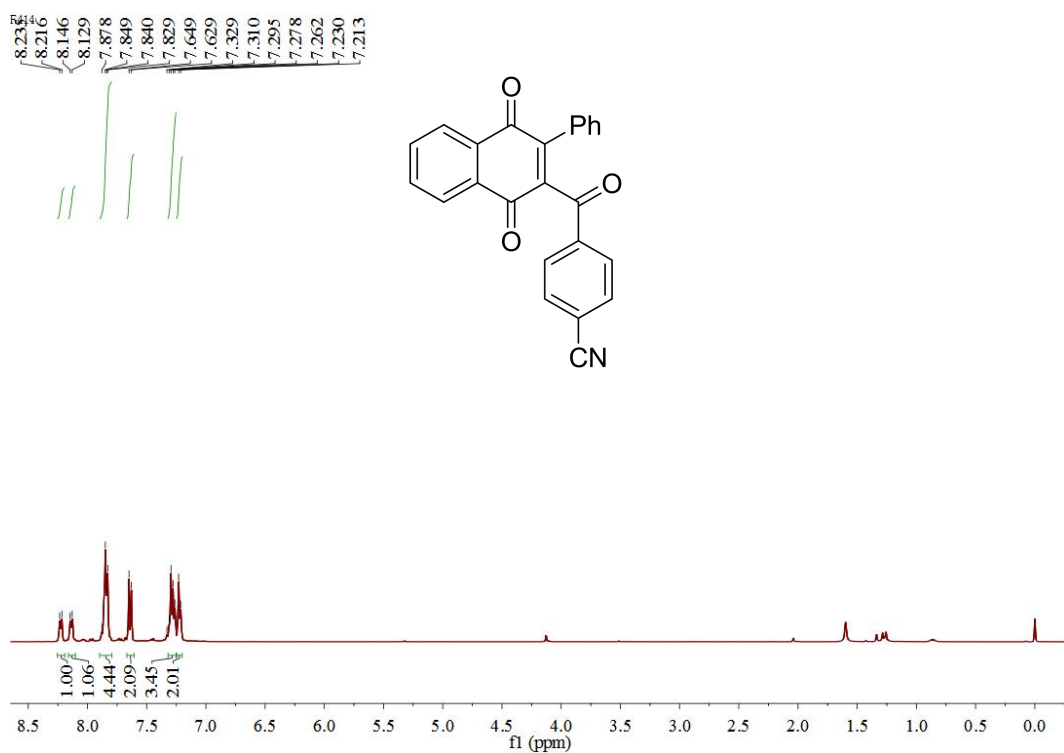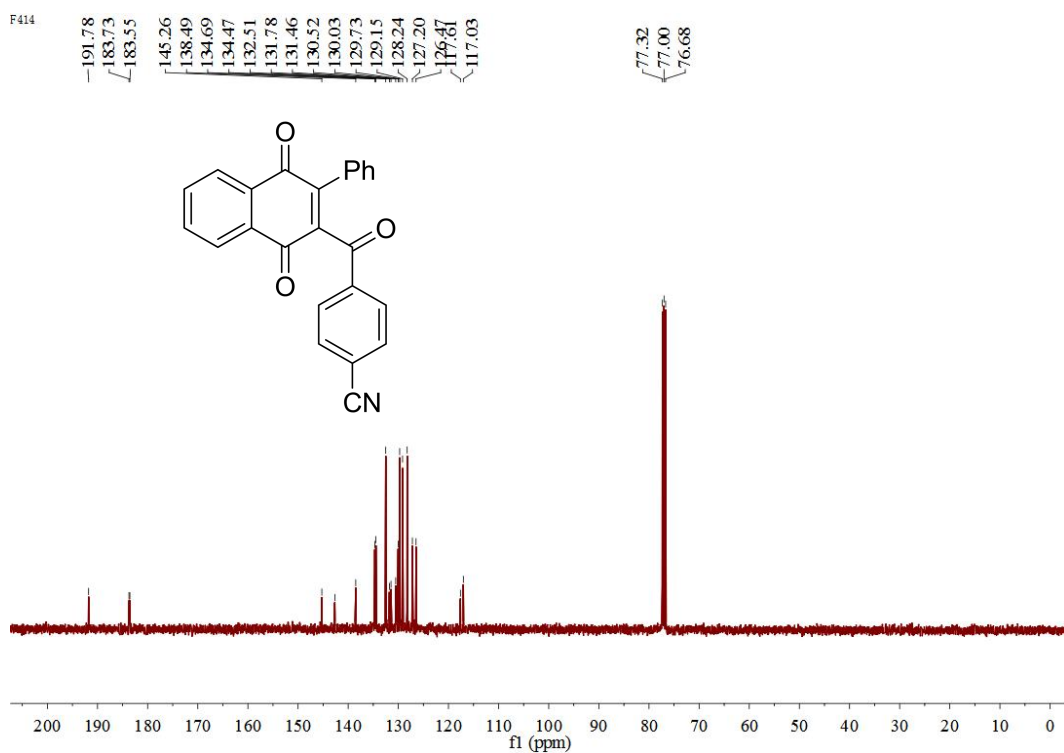

# <sup>1</sup>H NMR and <sup>13</sup>C NMR of 4l

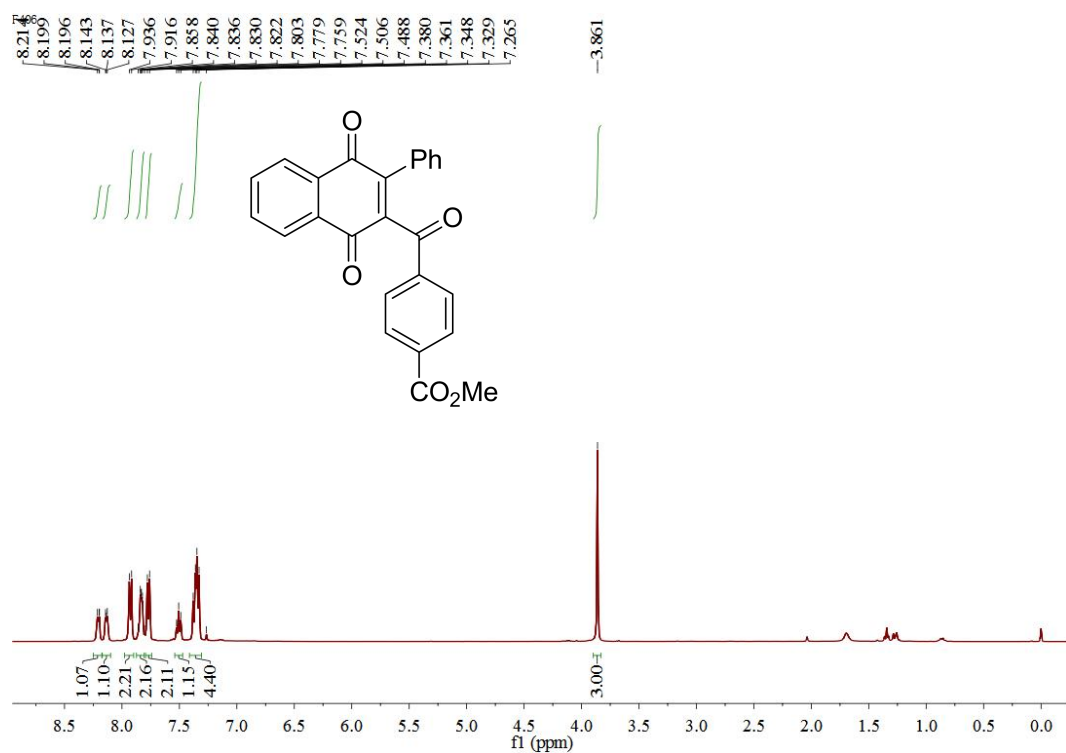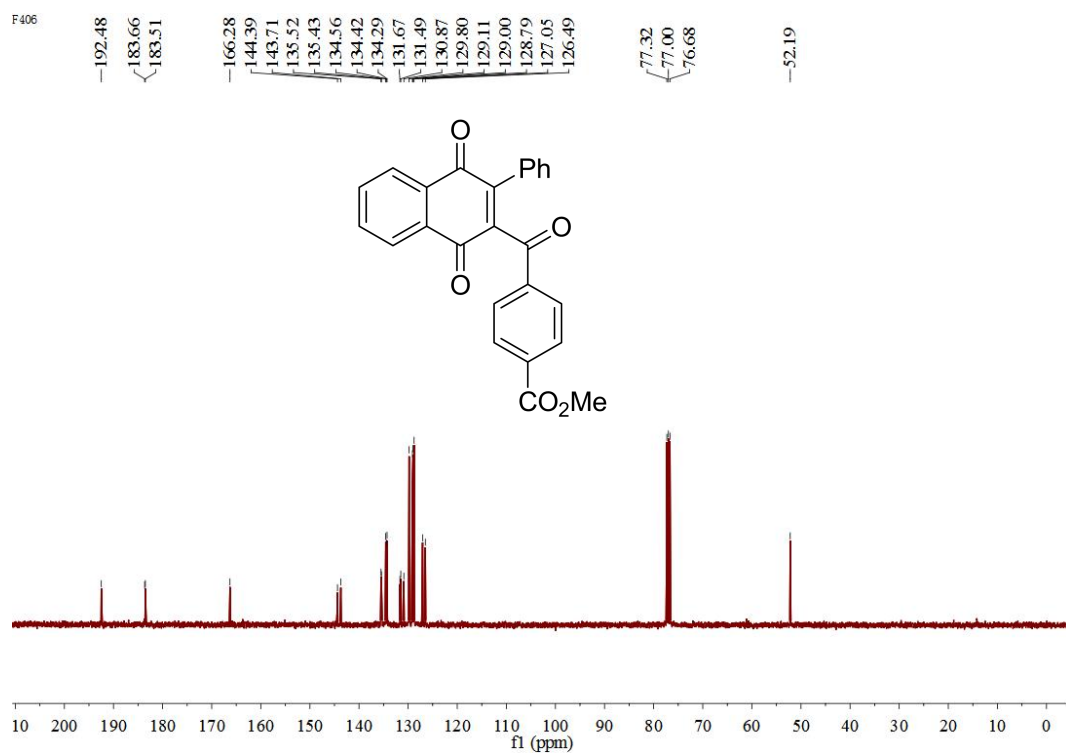

# <sup>1</sup>H NMR and <sup>13</sup>C NMR of 4m

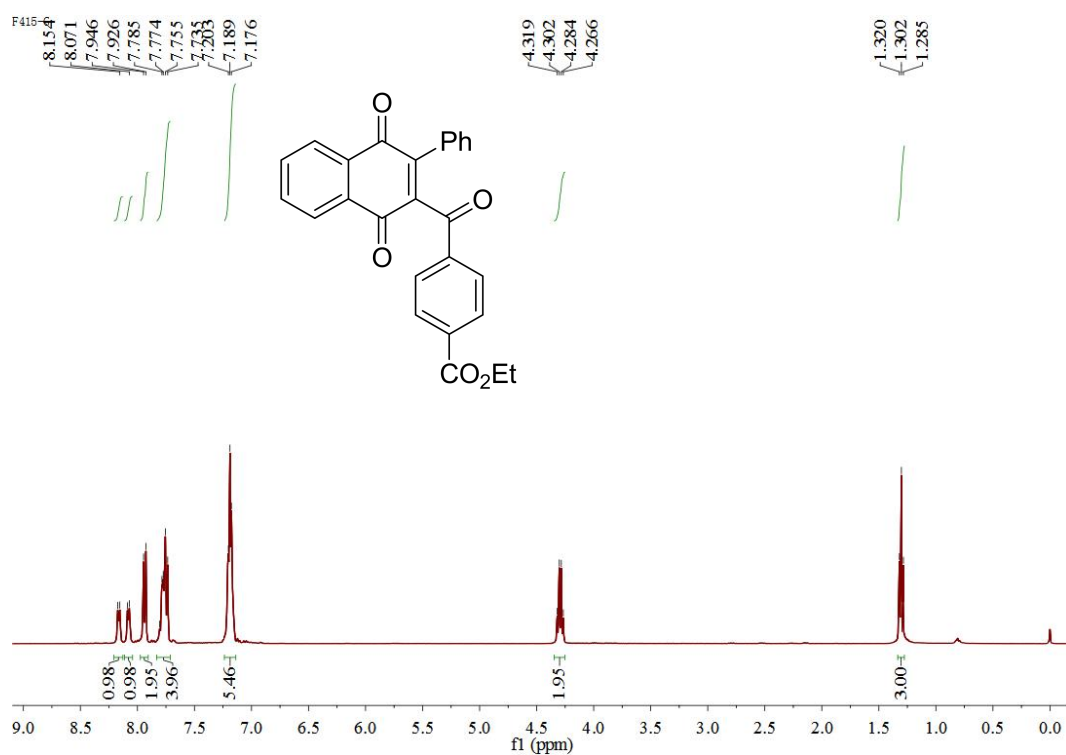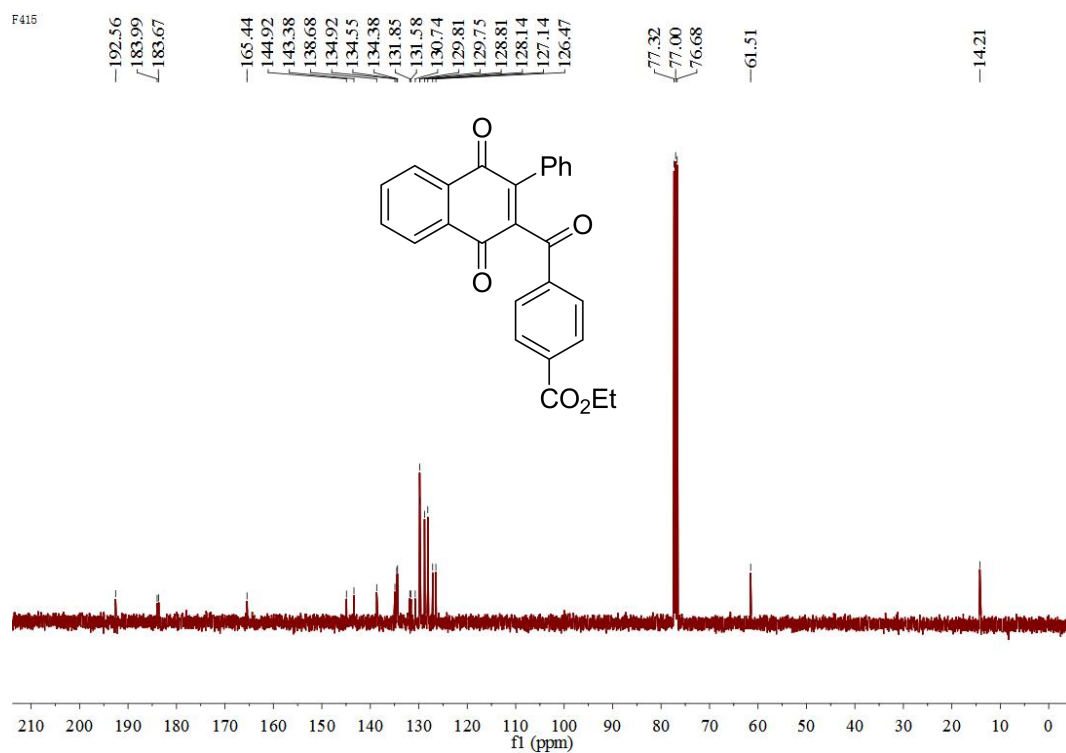

# <sup>1</sup>H NMR and <sup>13</sup>C NMR of 4n

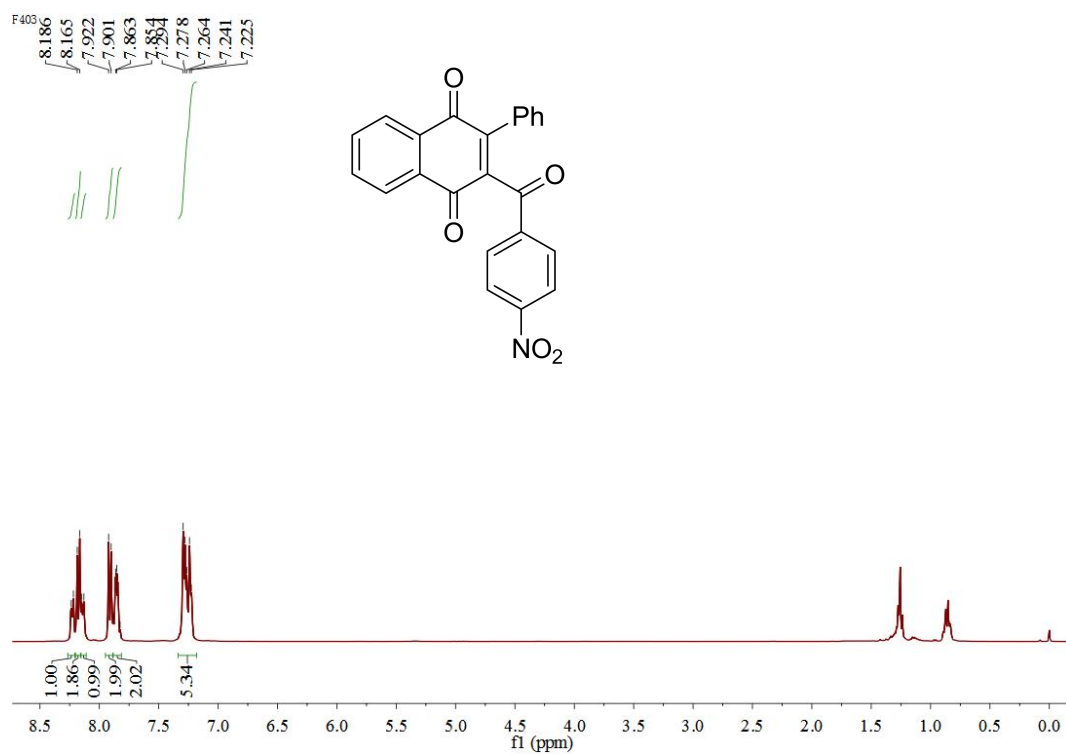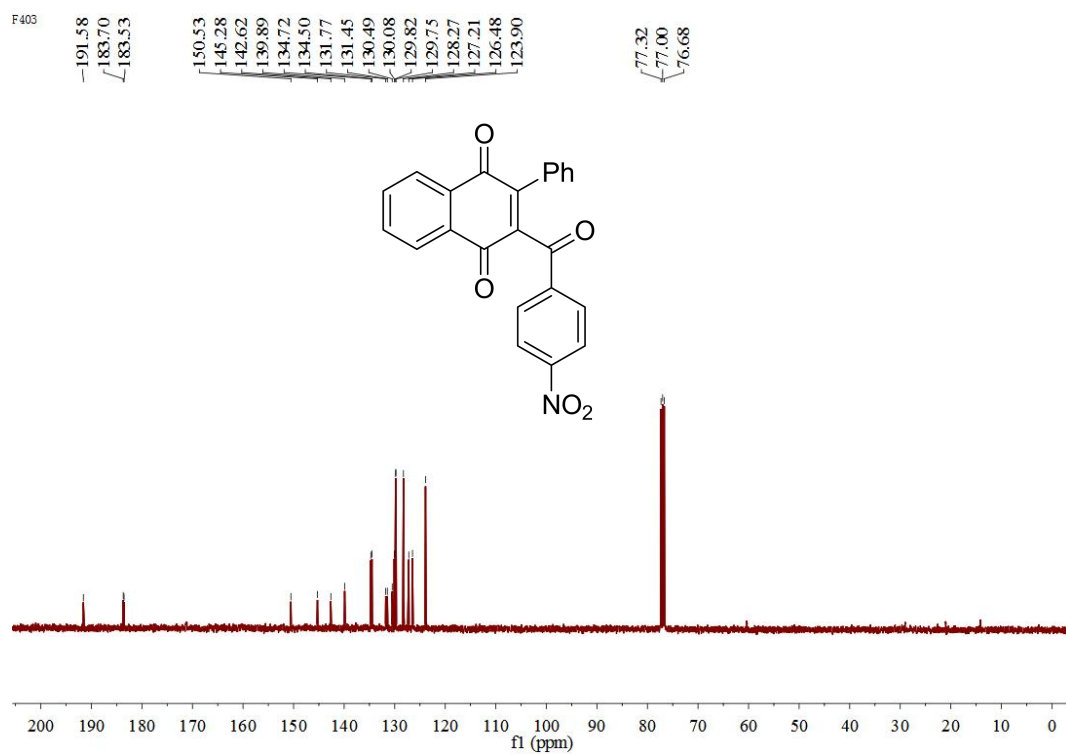

# <sup>1</sup>H NMR and <sup>13</sup>C NMR of 4o

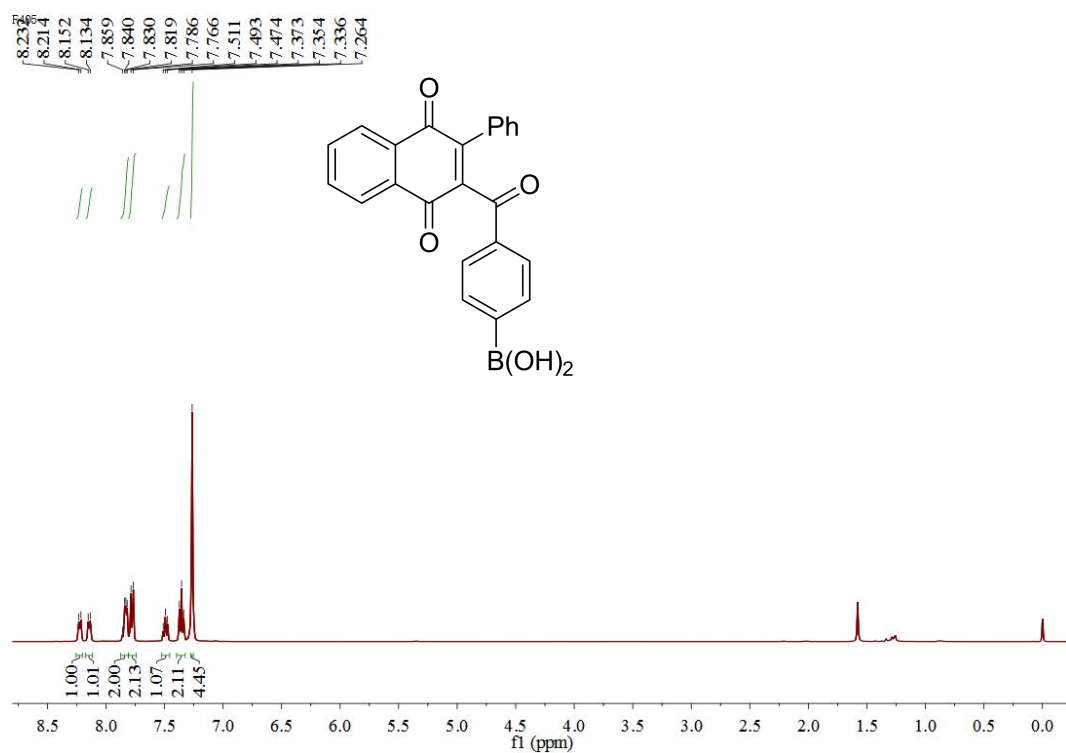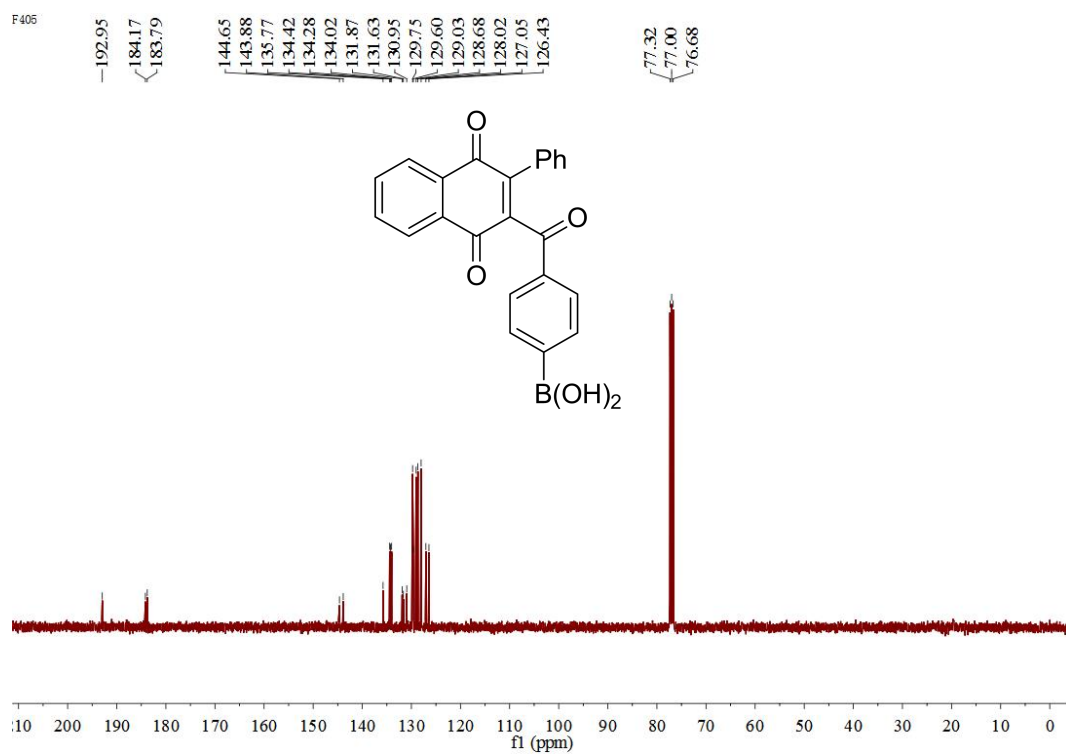

# <sup>1</sup>H NMR and <sup>13</sup>C NMR of 4p

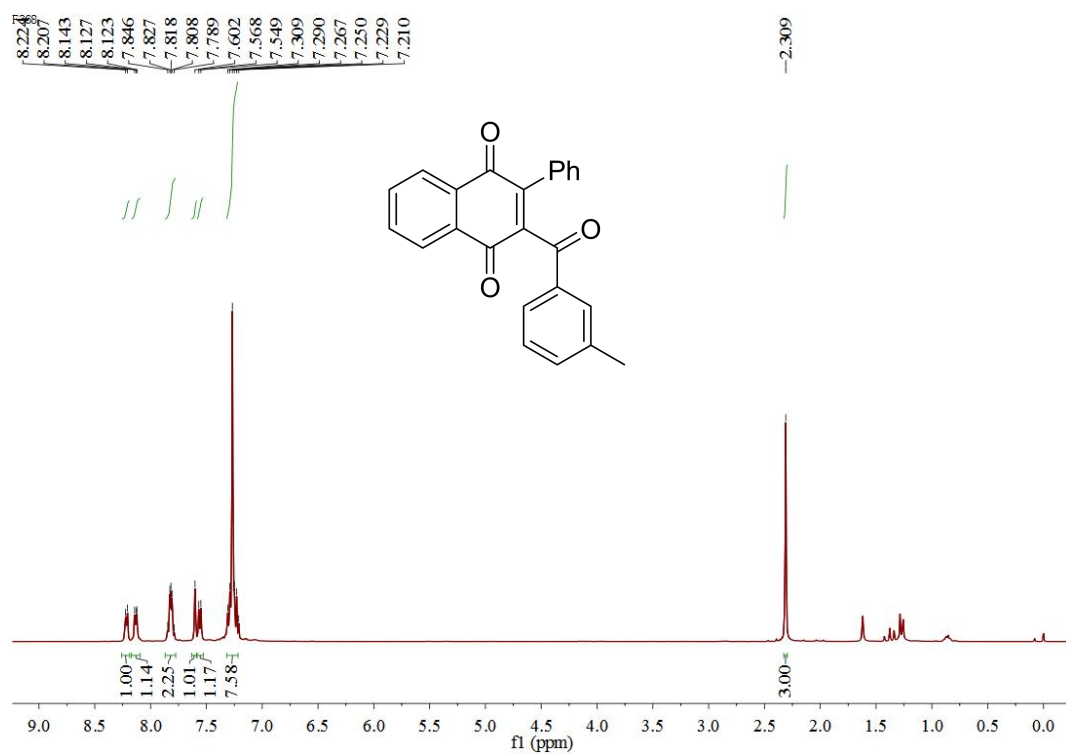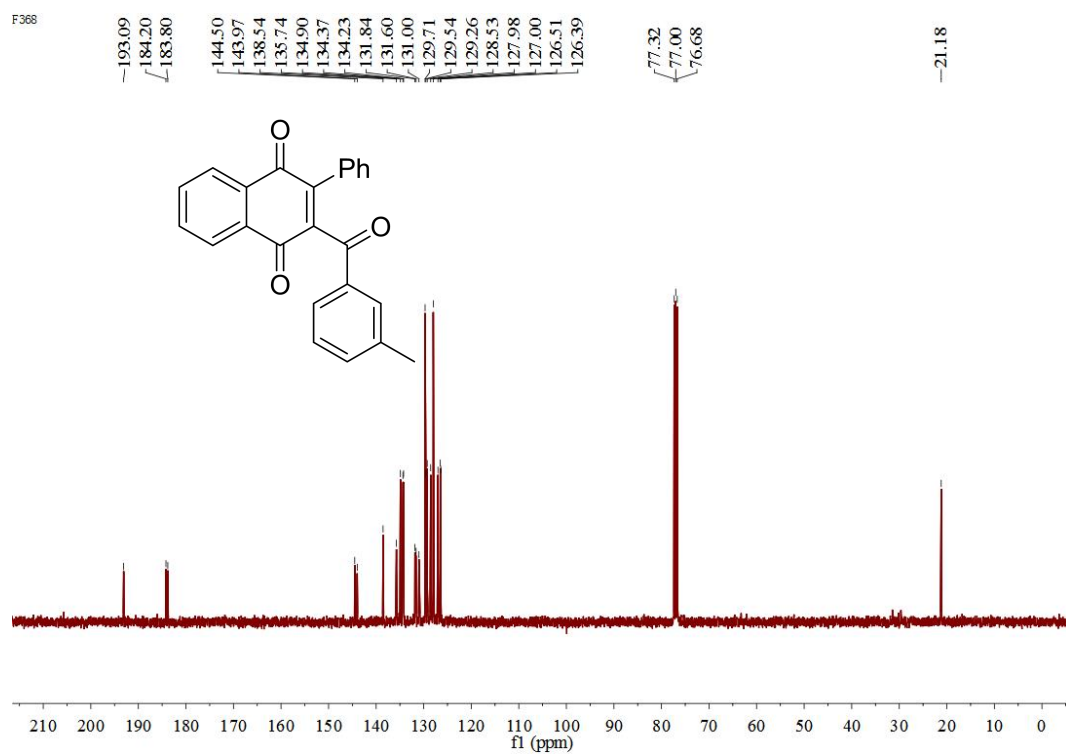

# <sup>1</sup>H NMR, <sup>13</sup>C NMR and <sup>19</sup>F NMR of 4q

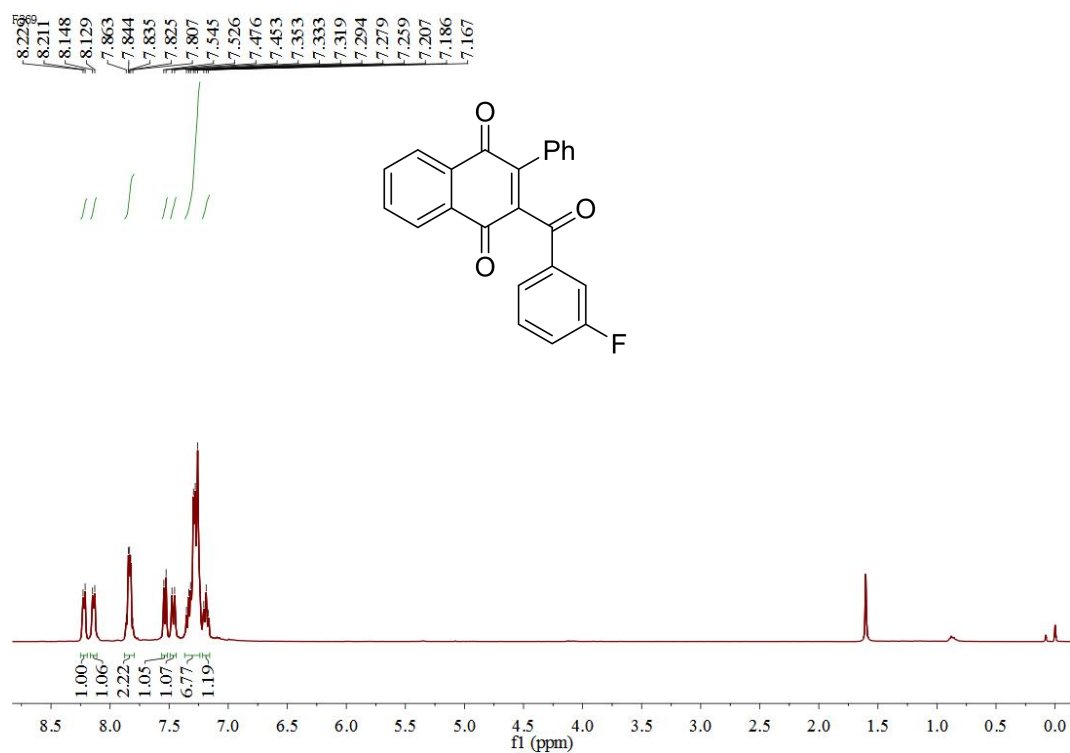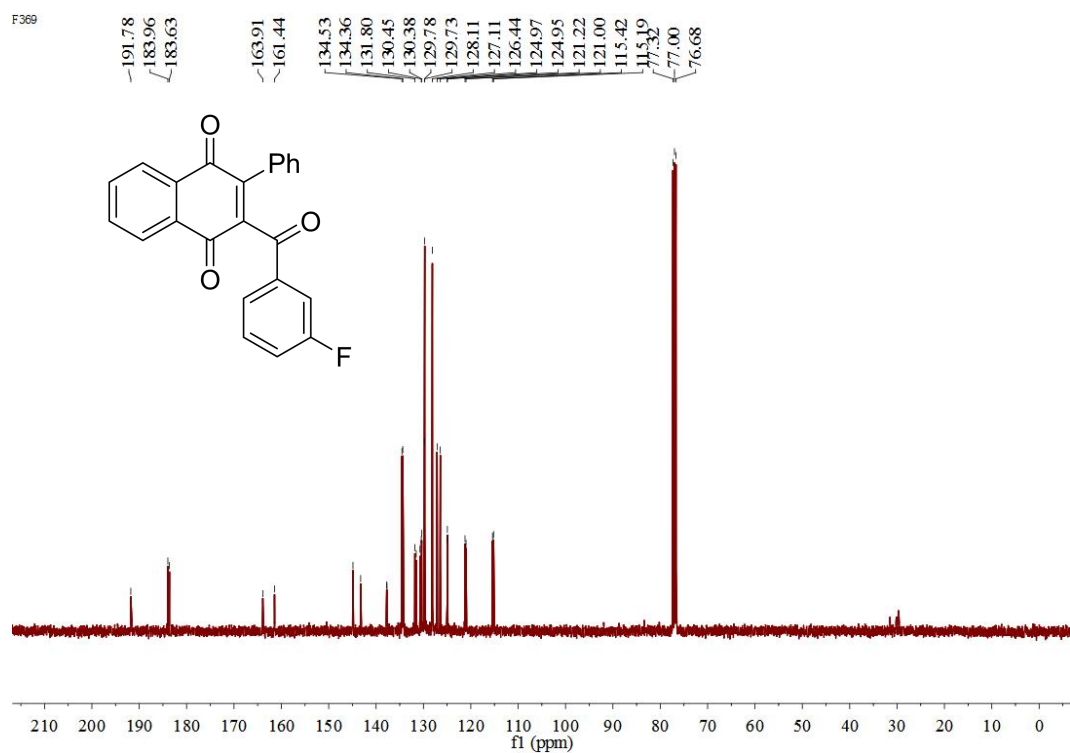

F369

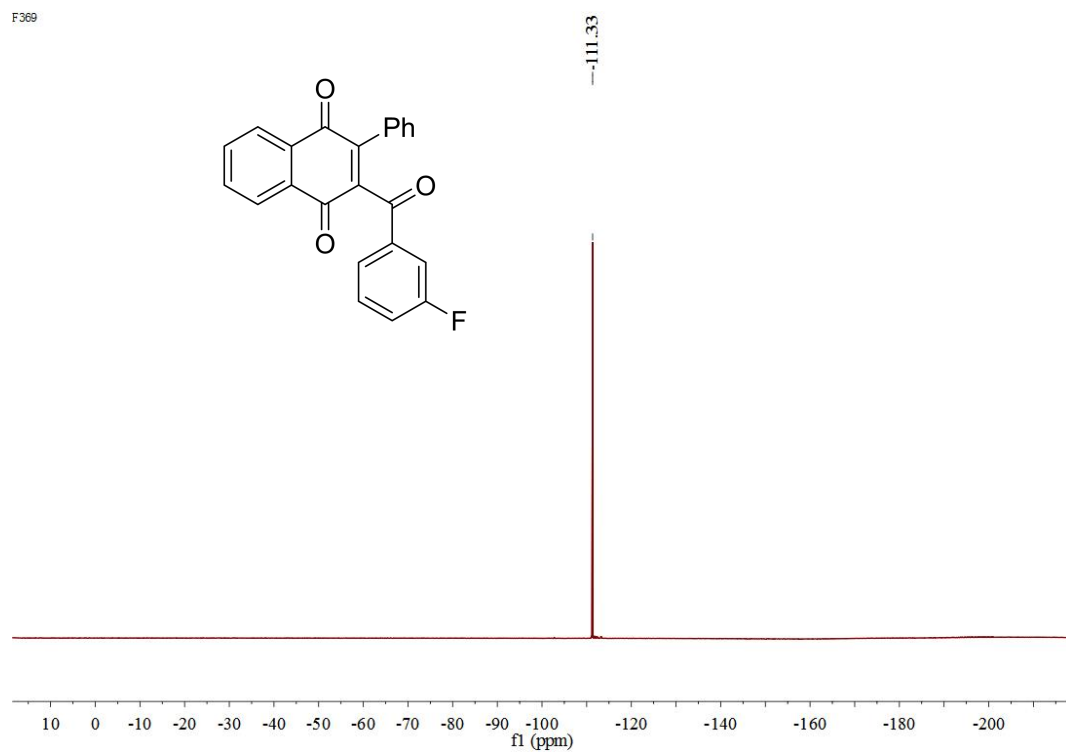

# <sup>1</sup>H NMR and <sup>13</sup>C NMR of 4r

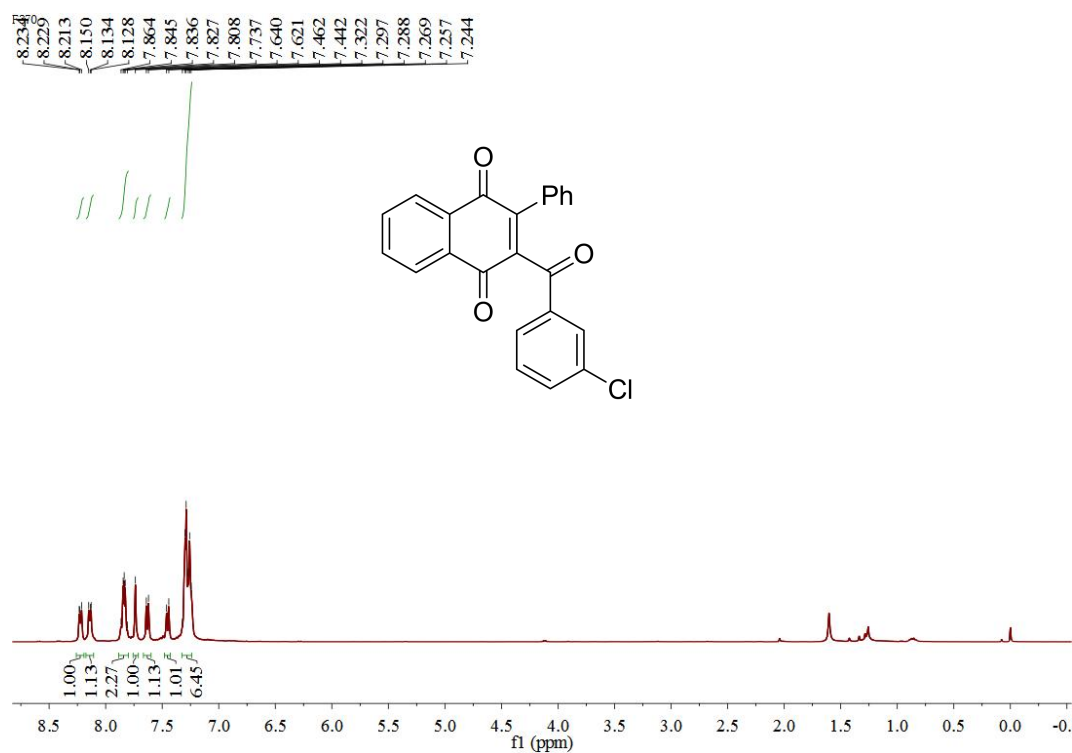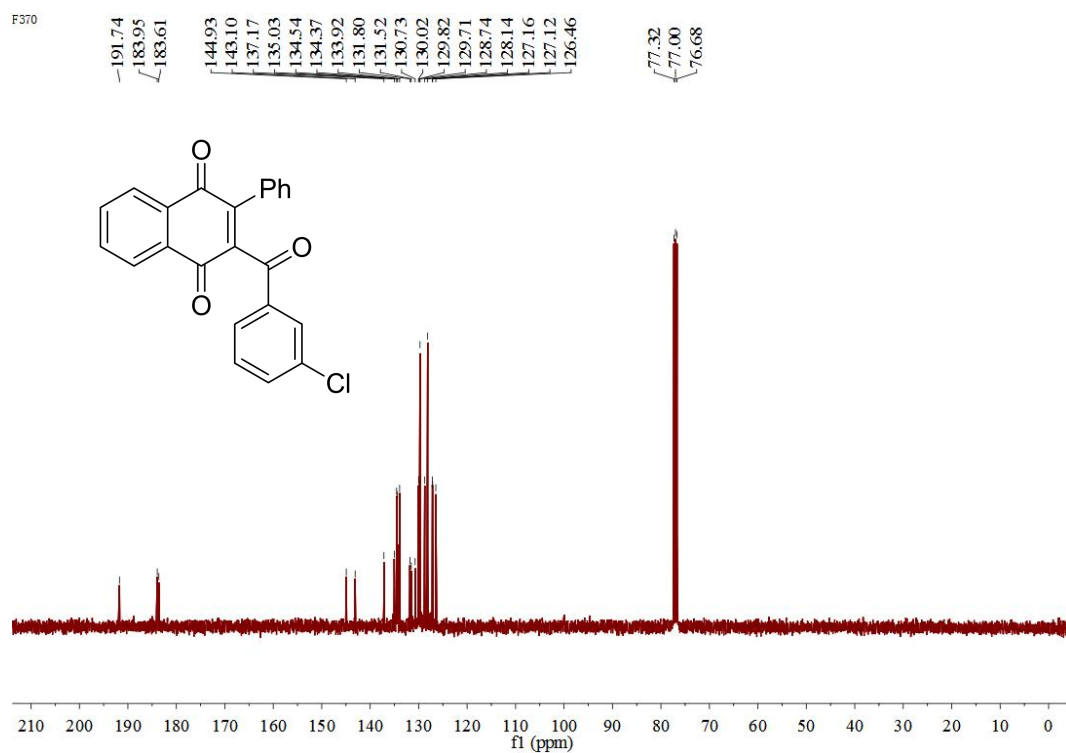

**<sup>1</sup>H NMR, <sup>13</sup>C NMR and <sup>19</sup>F NMR of 4s**

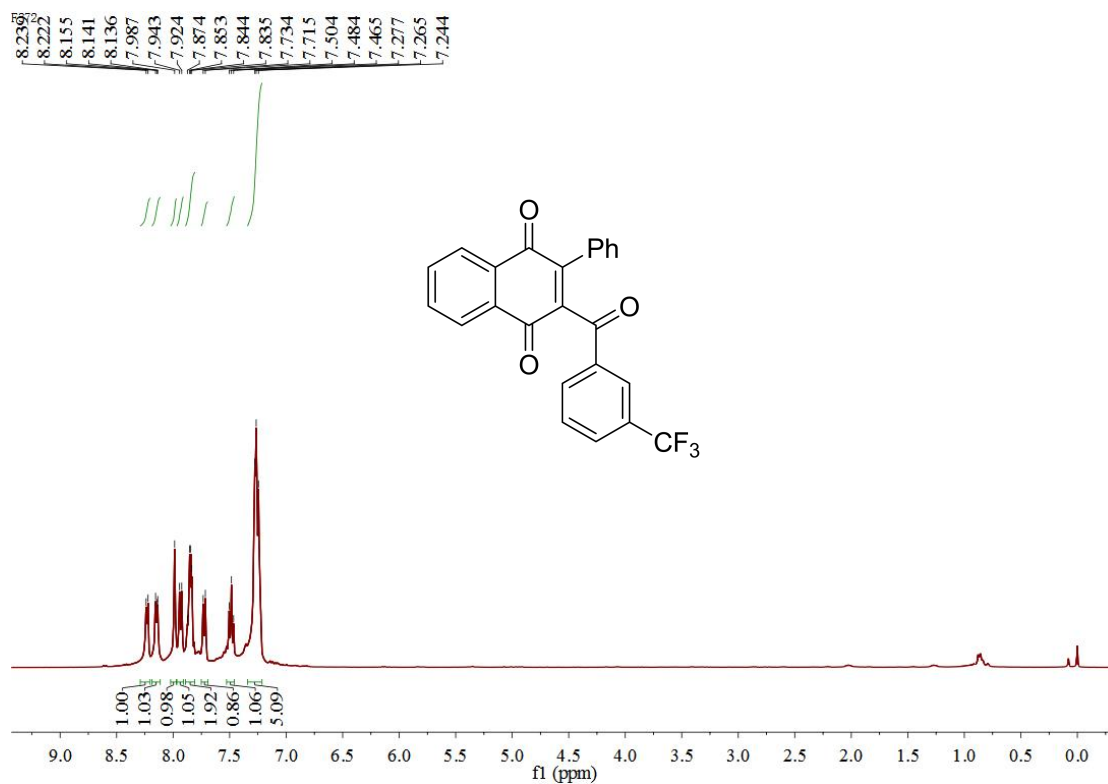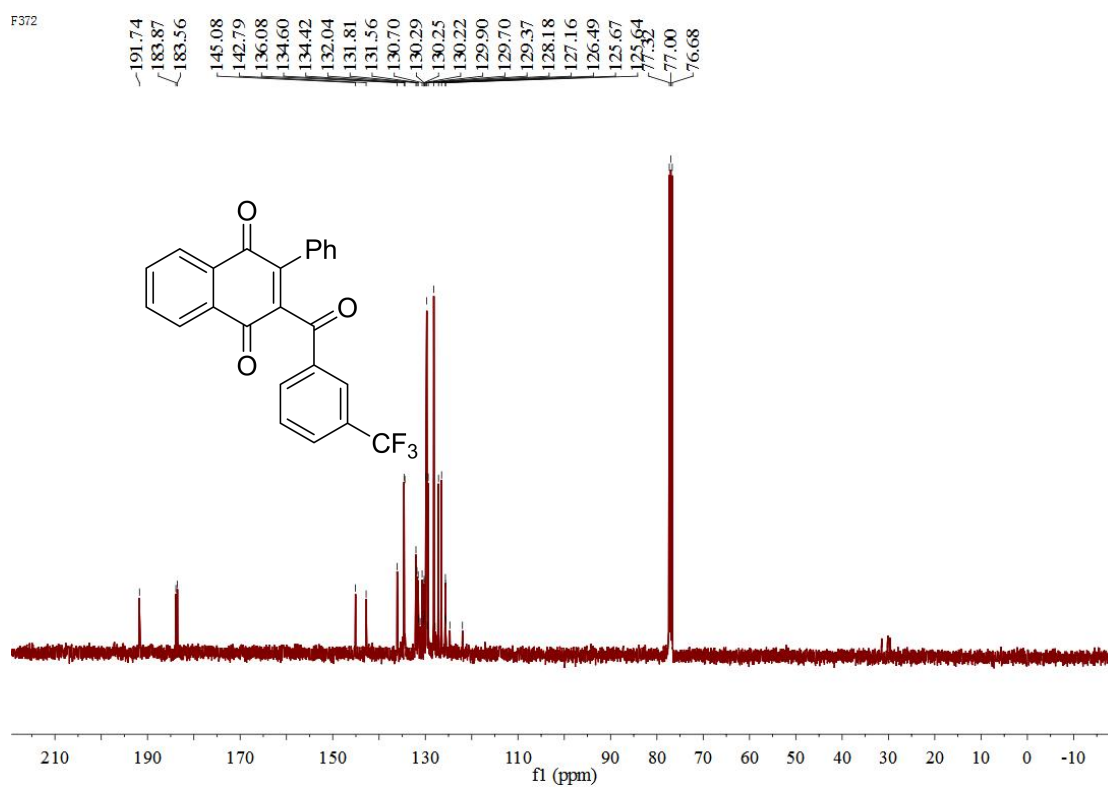

F372

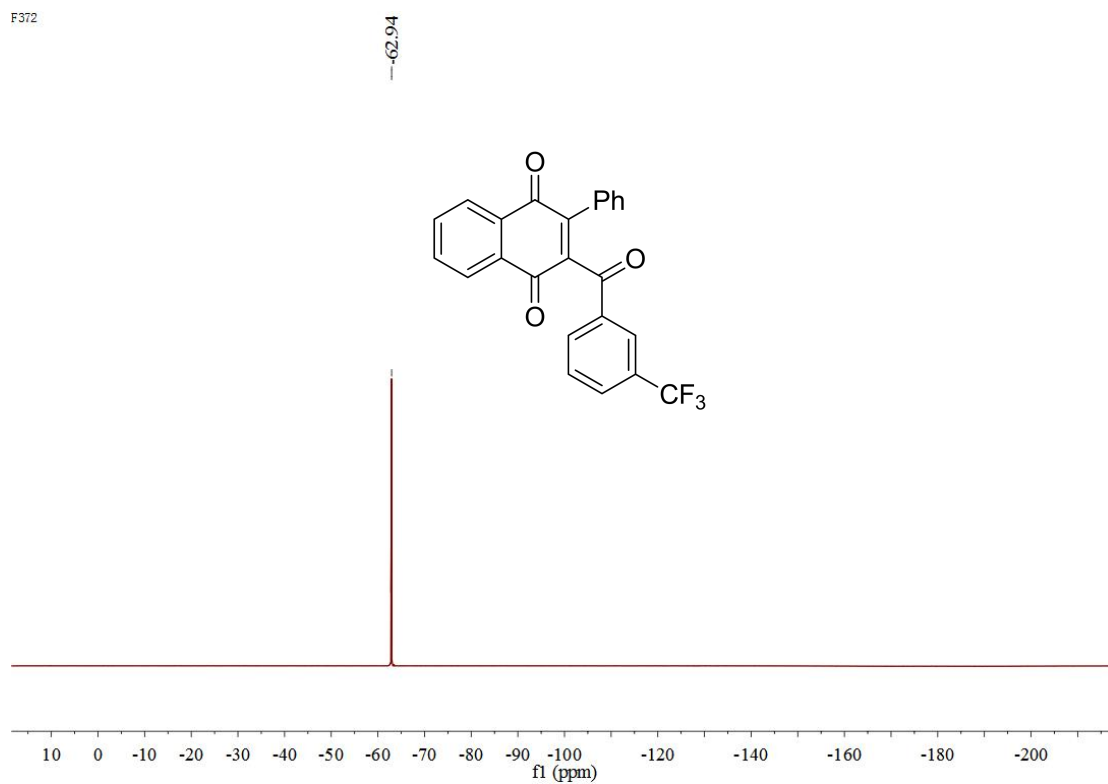

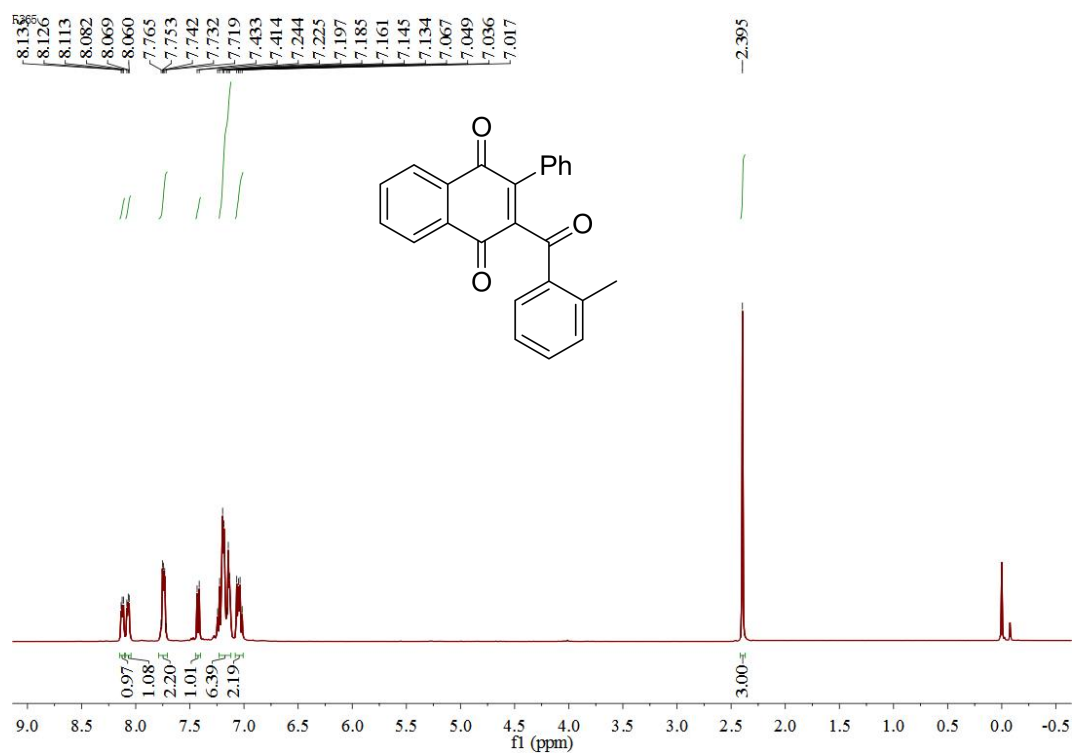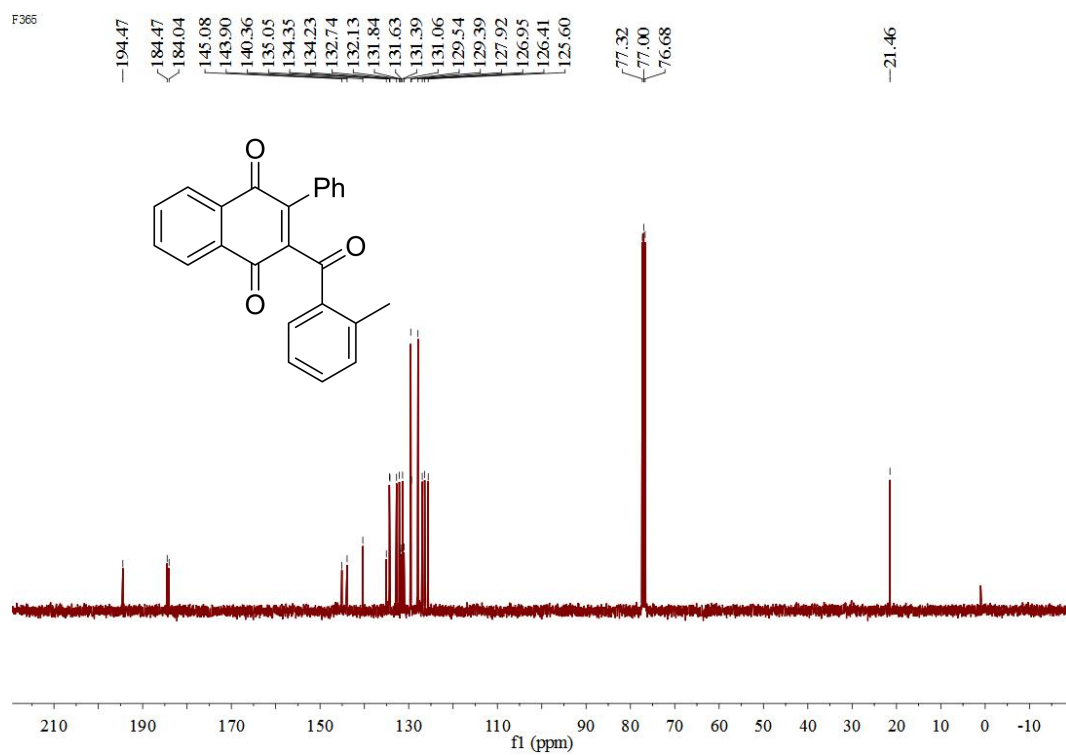

# <sup>1</sup>H NMR and <sup>13</sup>C NMR of 4u

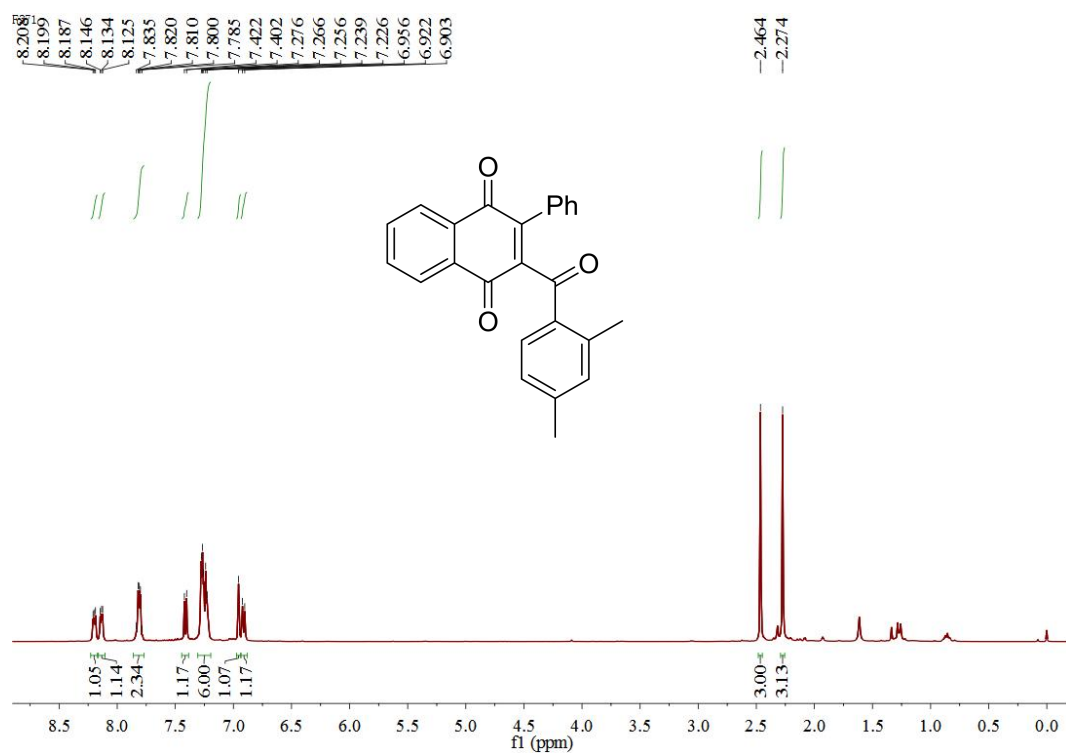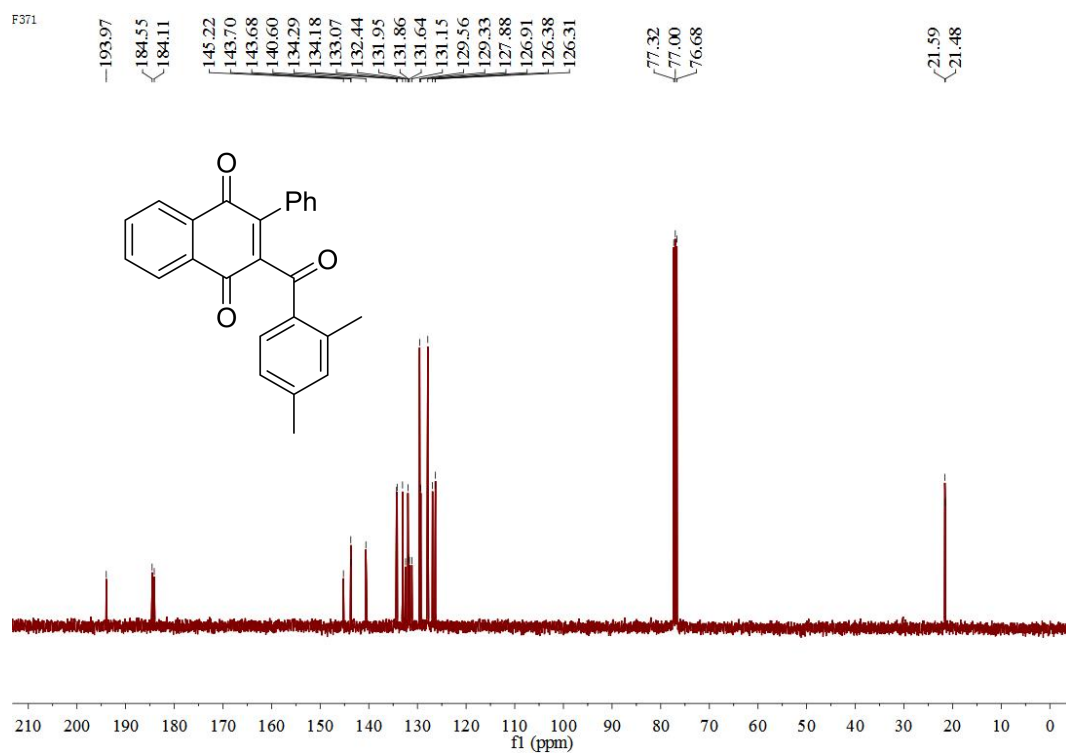

# <sup>1</sup>H NMR and <sup>13</sup>C NMR of 4v

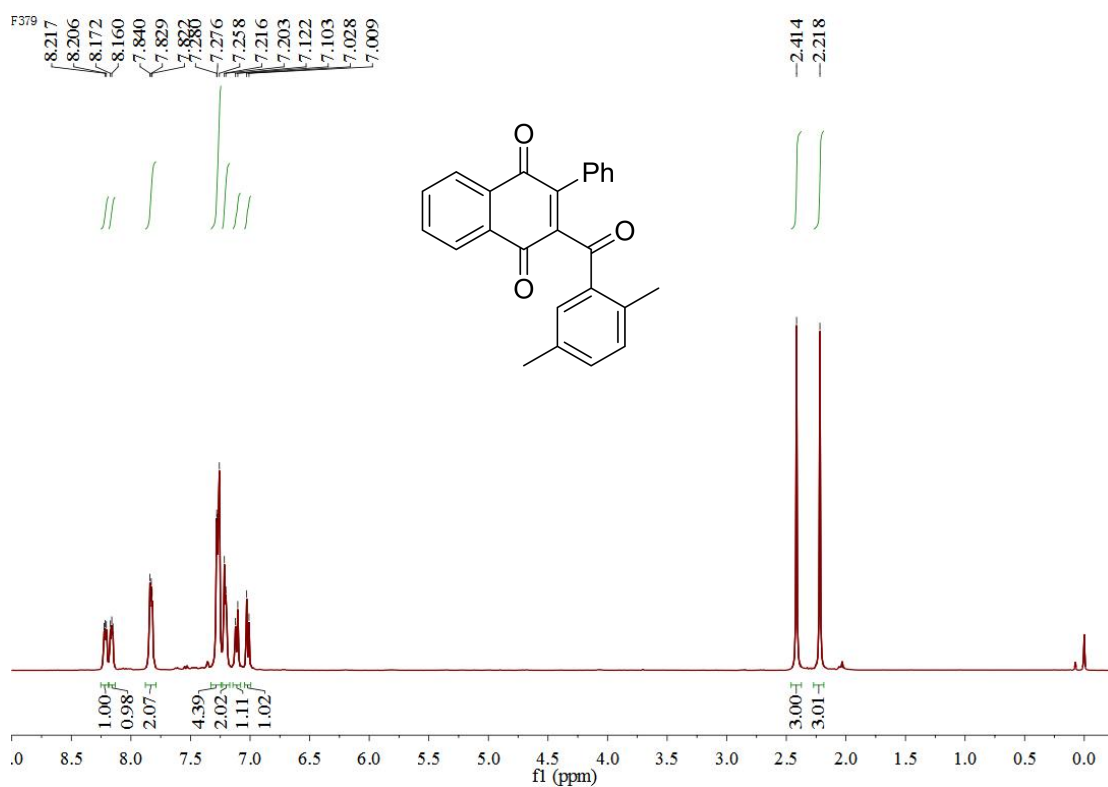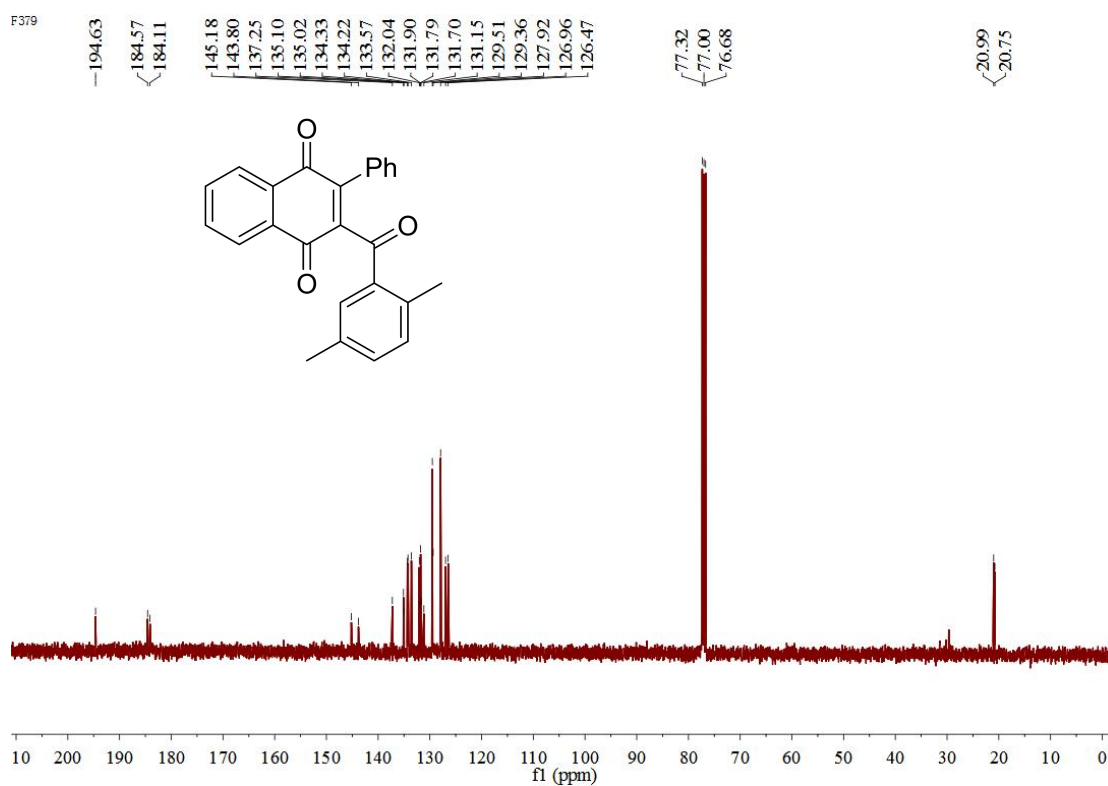

# <sup>1</sup>H NMR and <sup>13</sup>C NMR of 4w

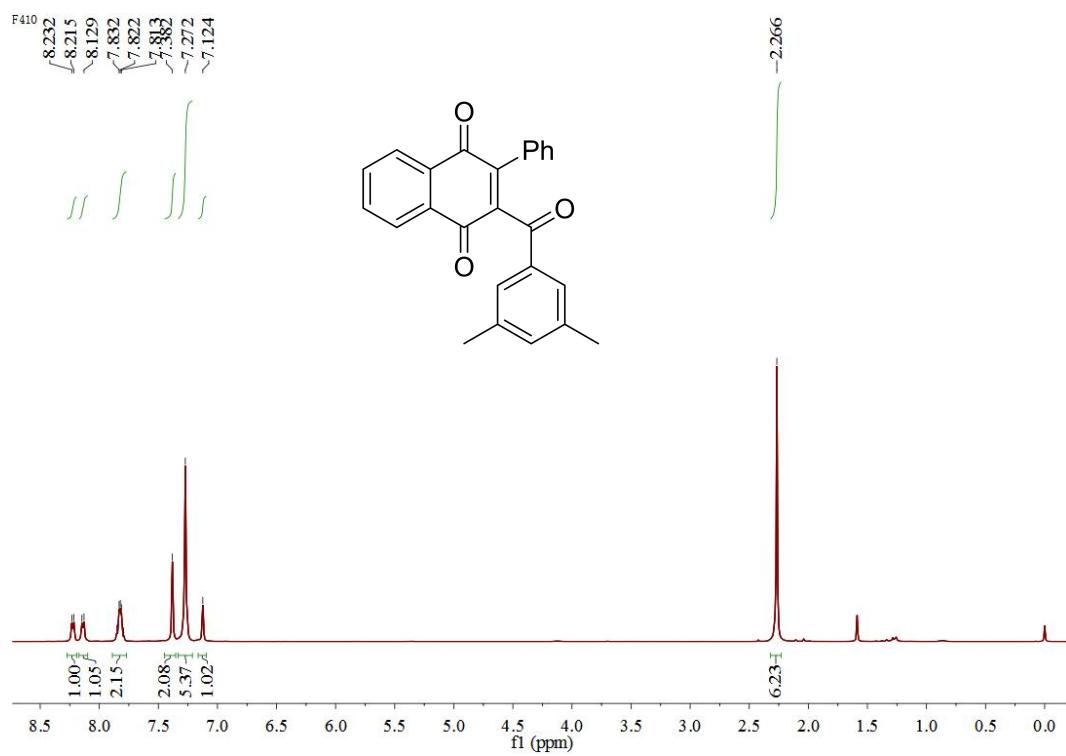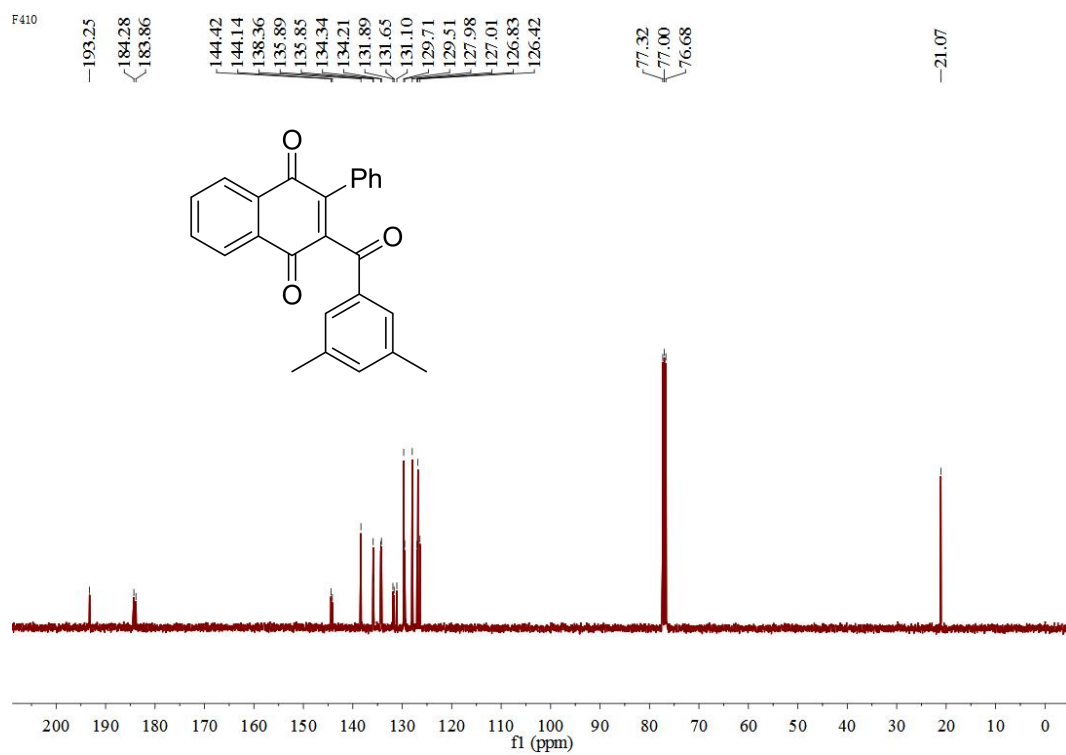

# <sup>1</sup>H NMR, <sup>13</sup>C NMR and <sup>19</sup>F NMR of 4x

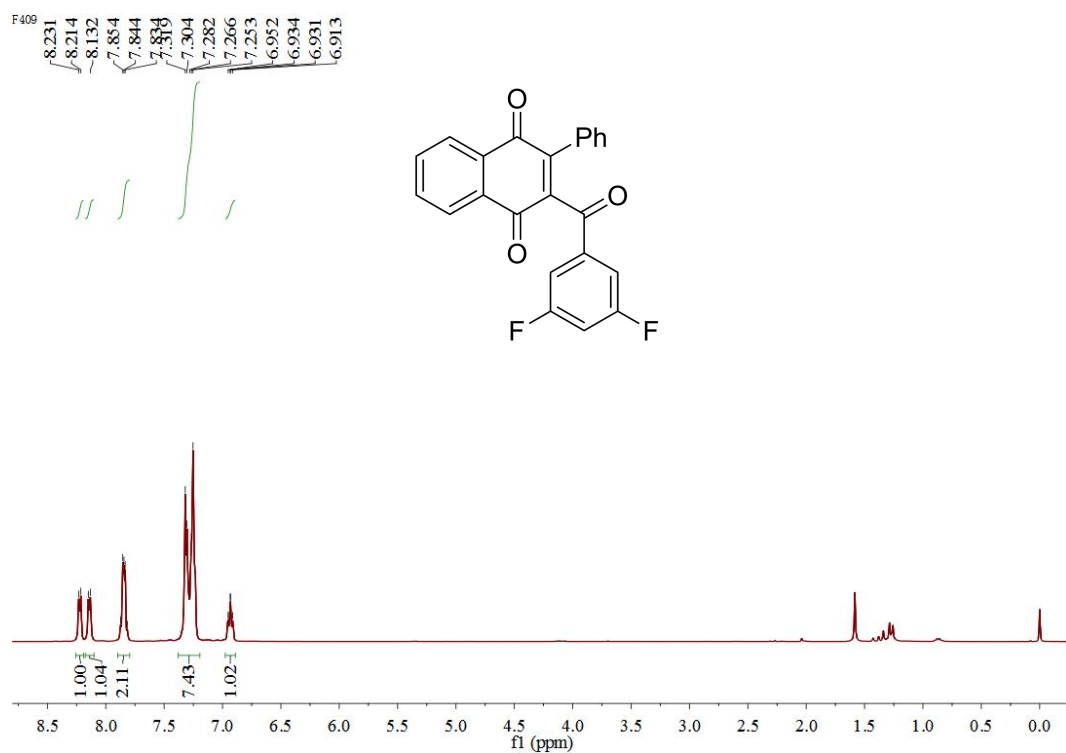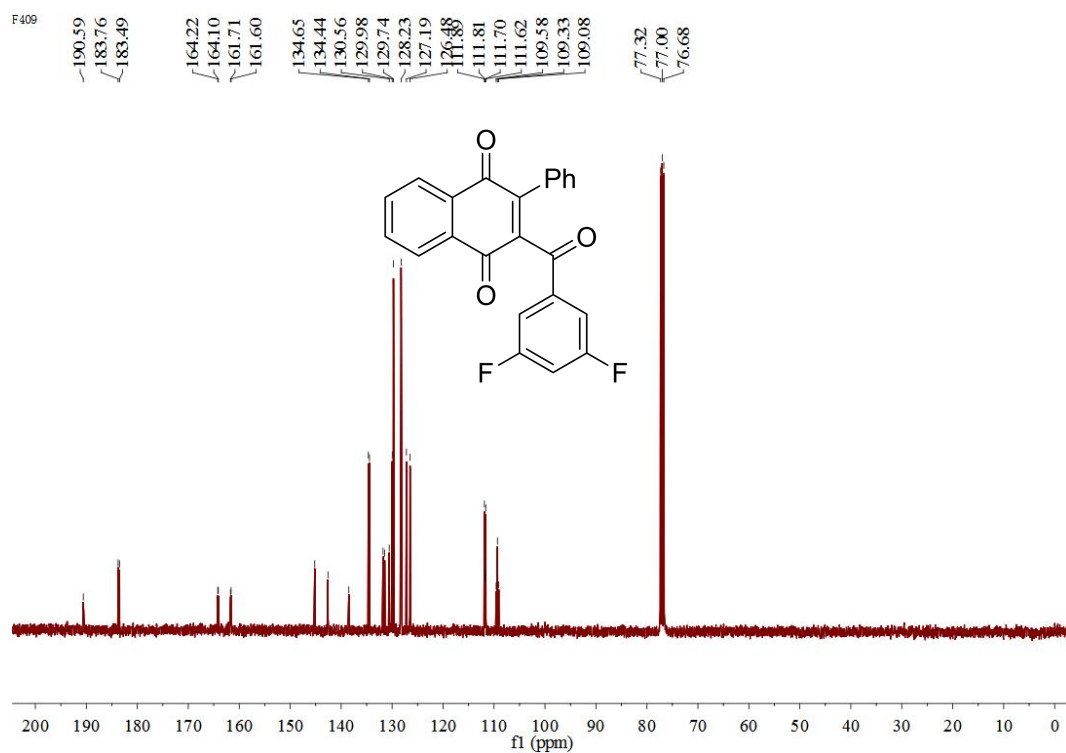

F409

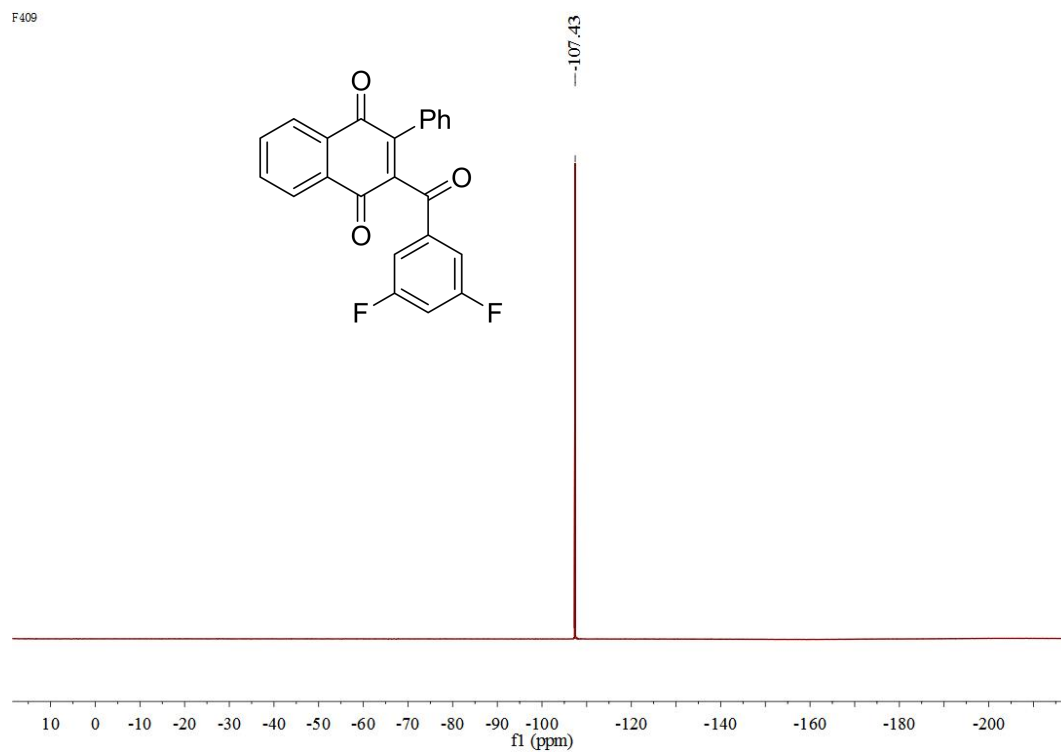

# <sup>1</sup>H NMR, <sup>13</sup>C NMR and <sup>19</sup>F NMR of 4y

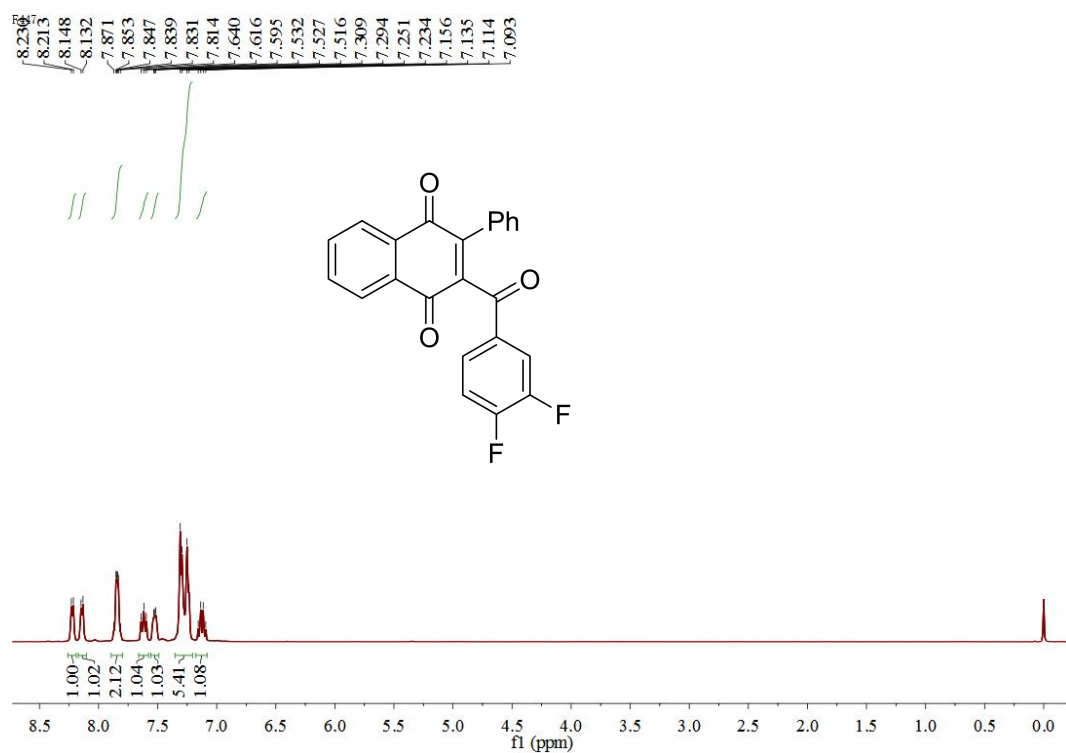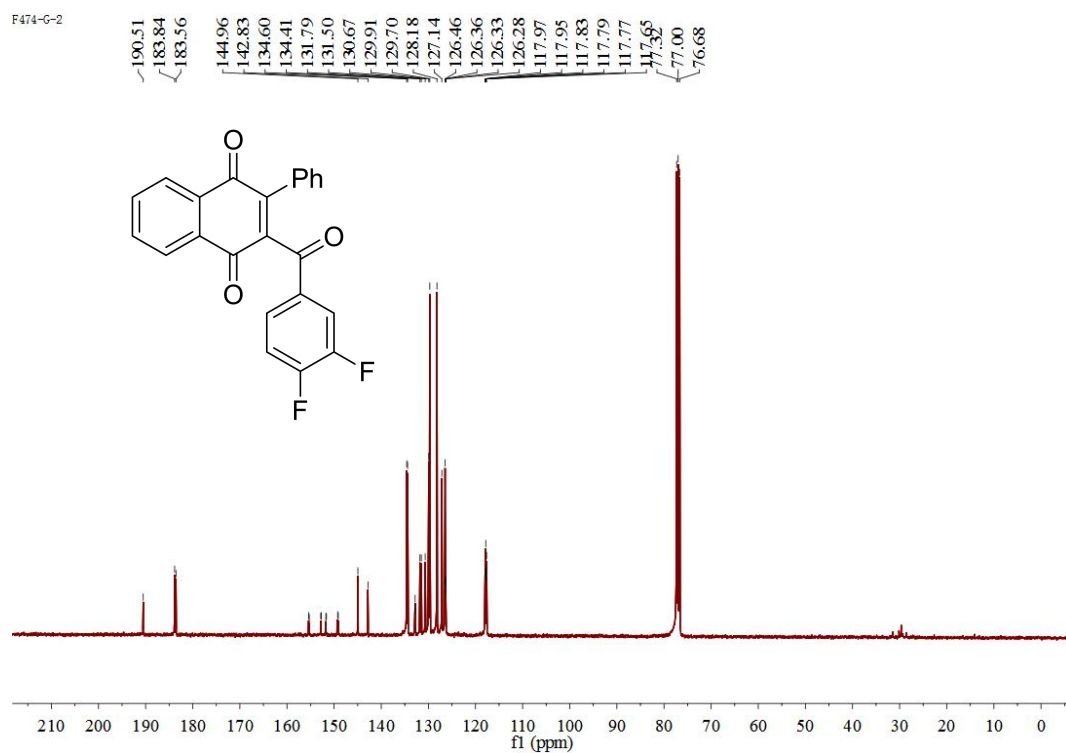

F447

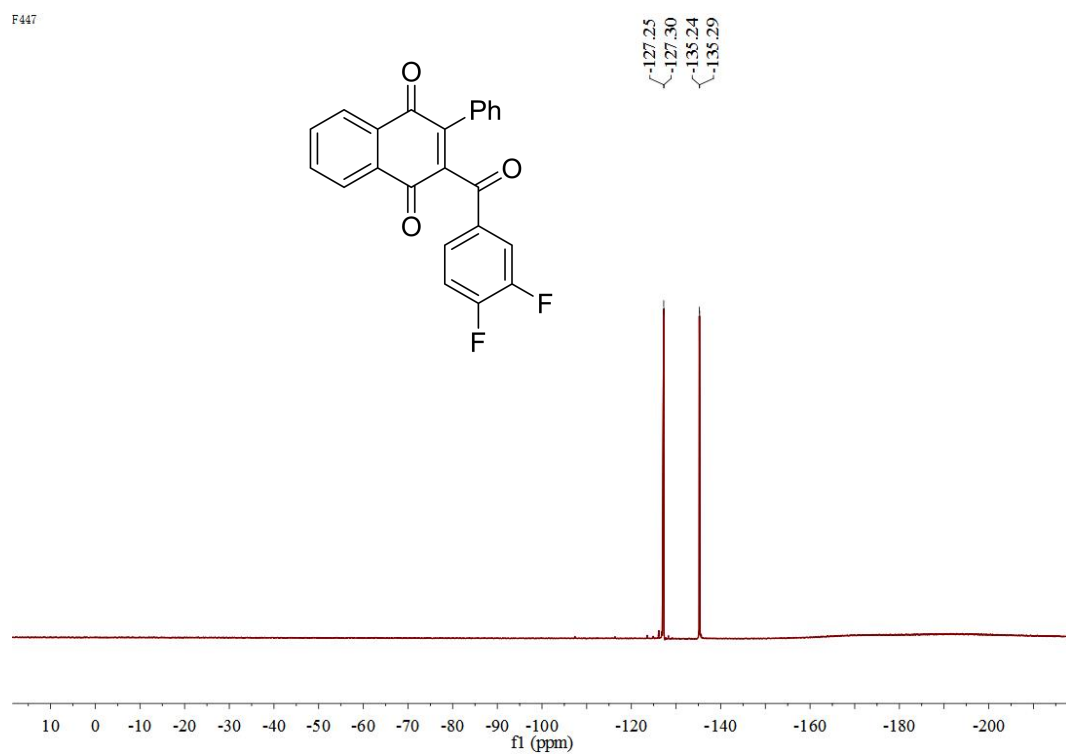

# <sup>1</sup>H NMR and <sup>13</sup>C NMR of 4z

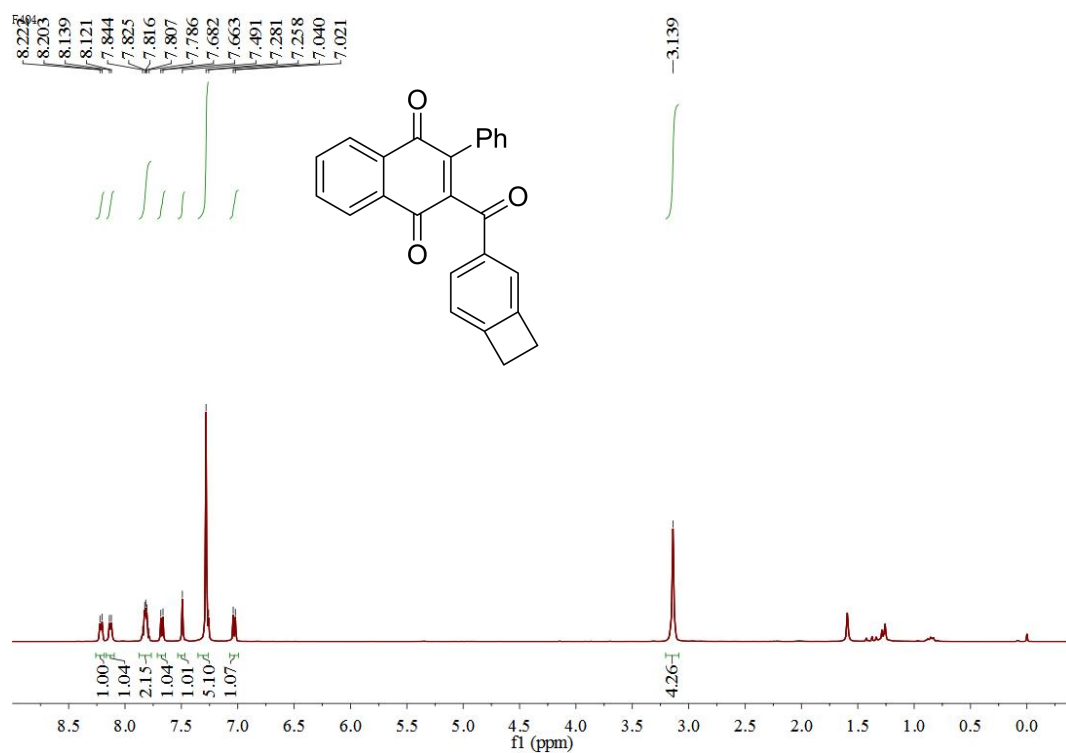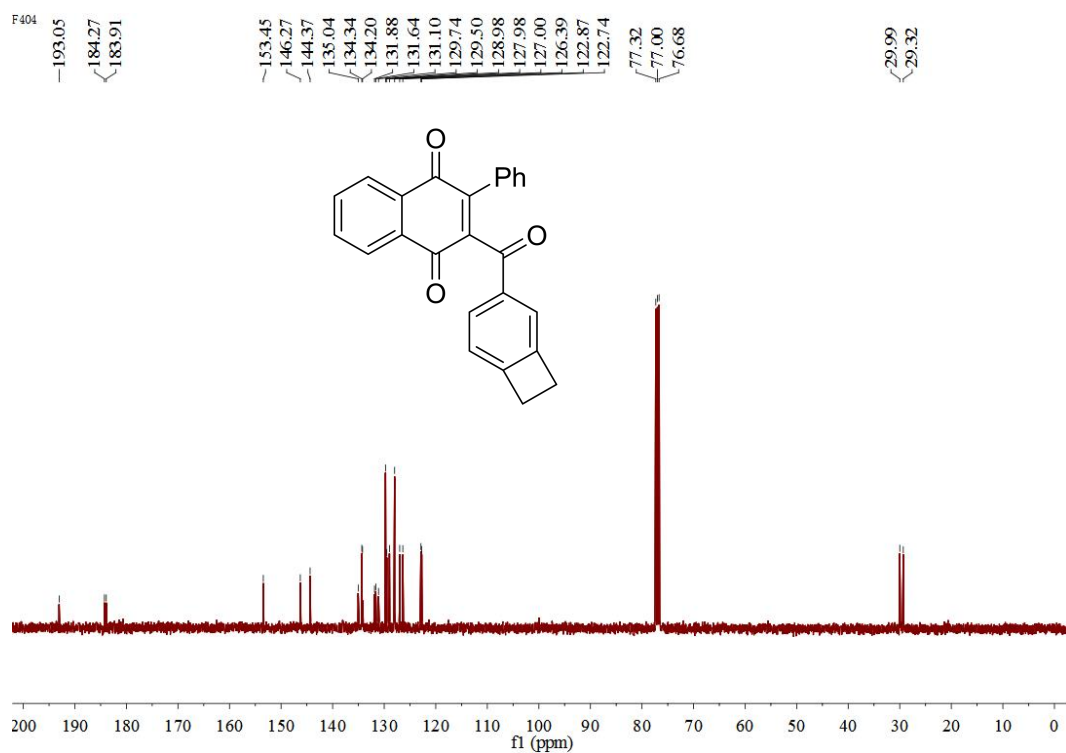

### <sup>1</sup>H NMR and <sup>13</sup>C NMR of 4aa

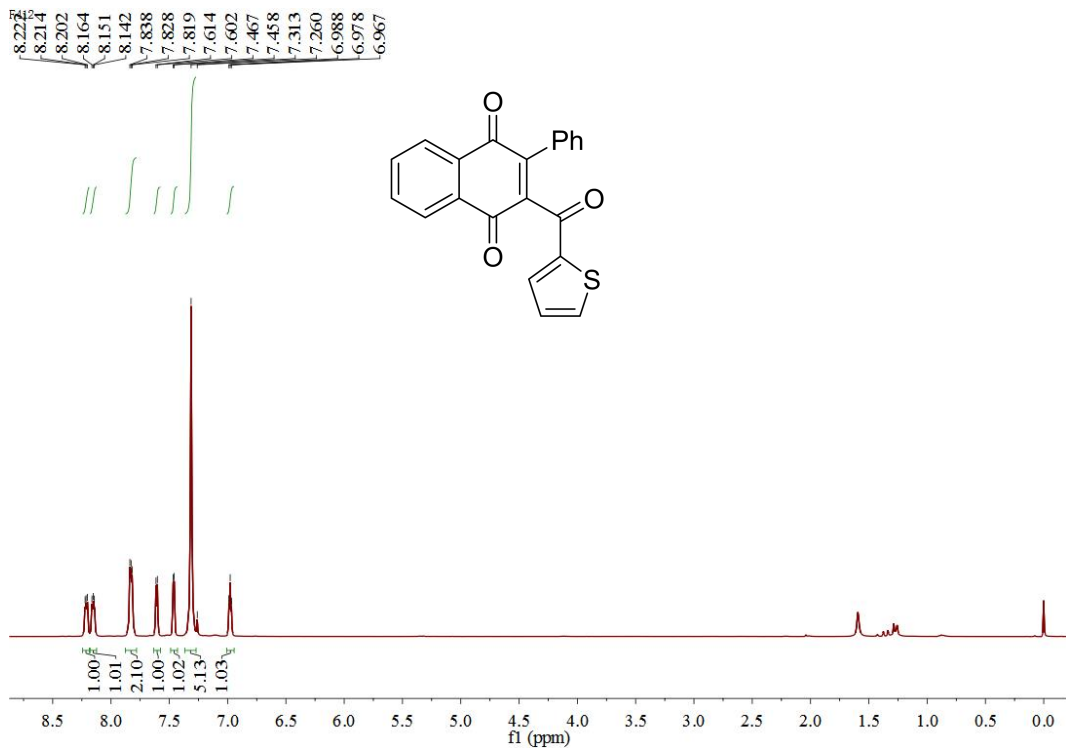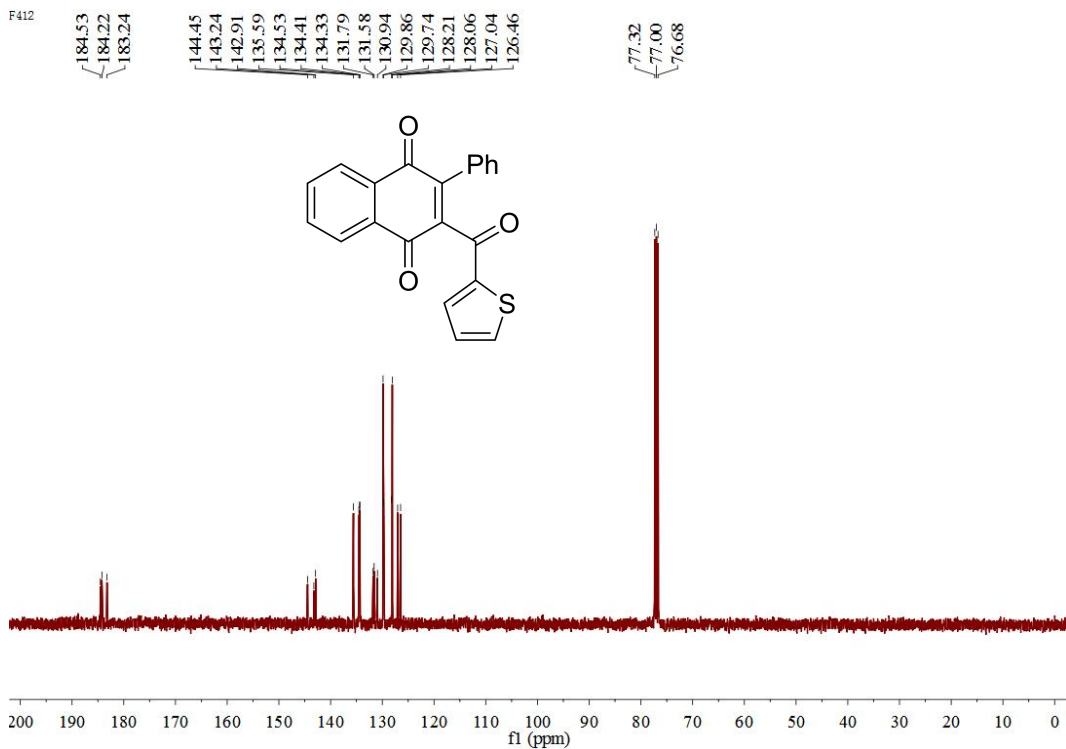

# <sup>1</sup>H NMR and <sup>13</sup>C NMR of 4ab

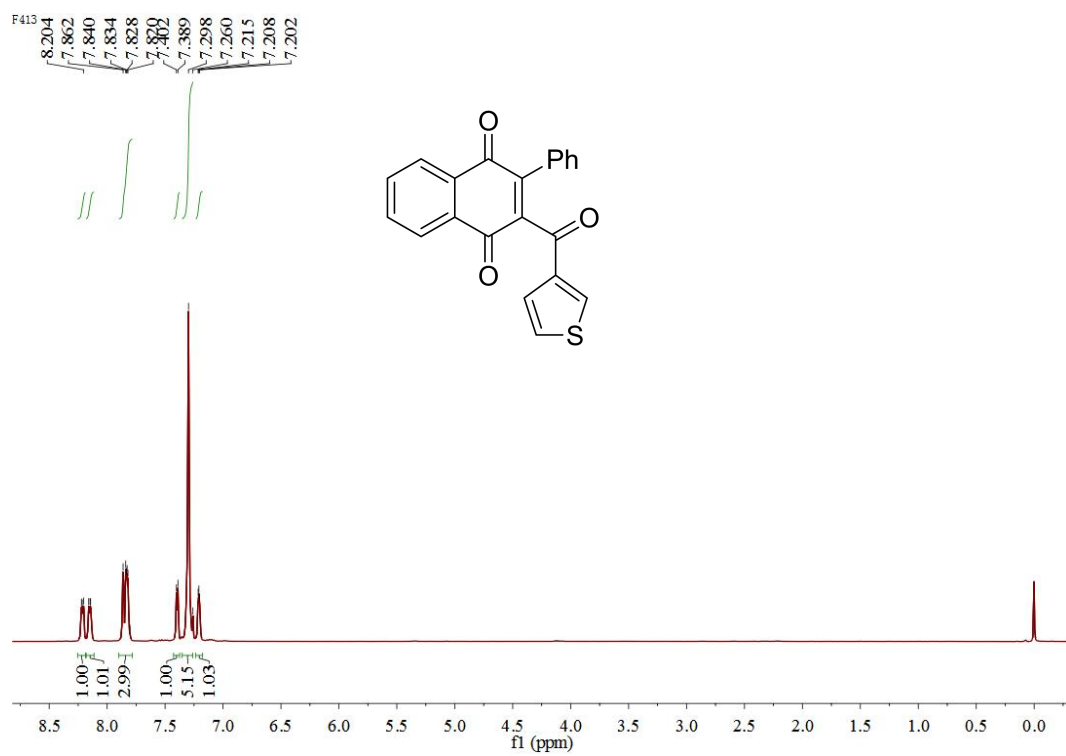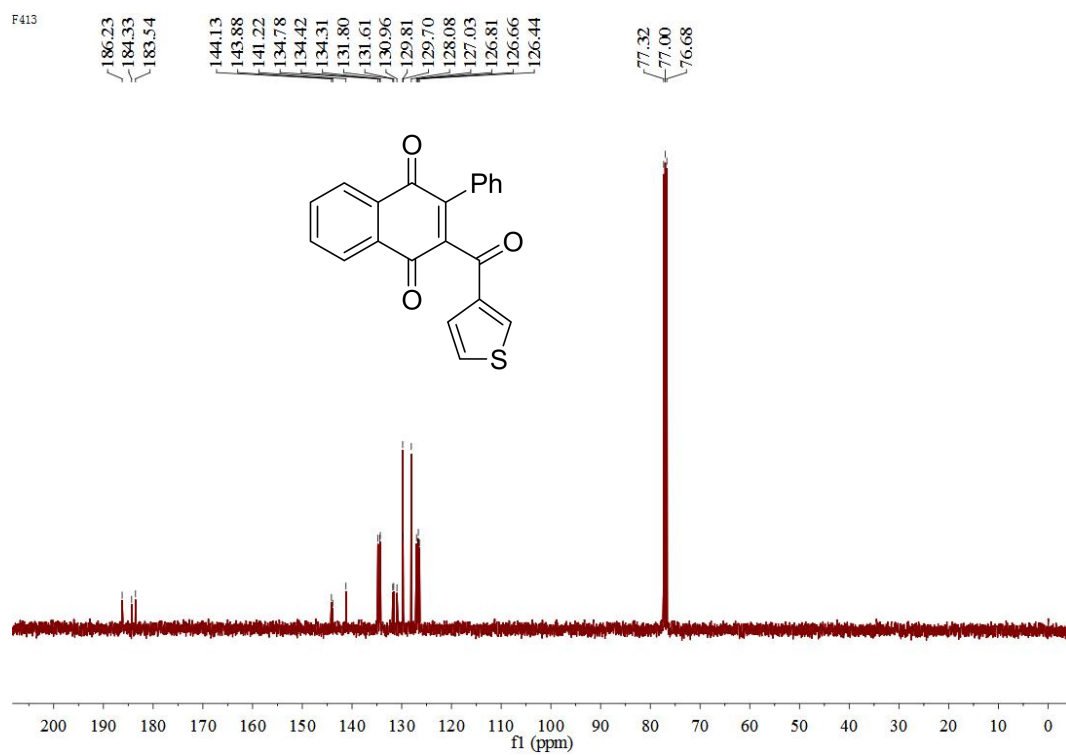

# <sup>1</sup>H NMR and <sup>13</sup>C NMR of 4ac

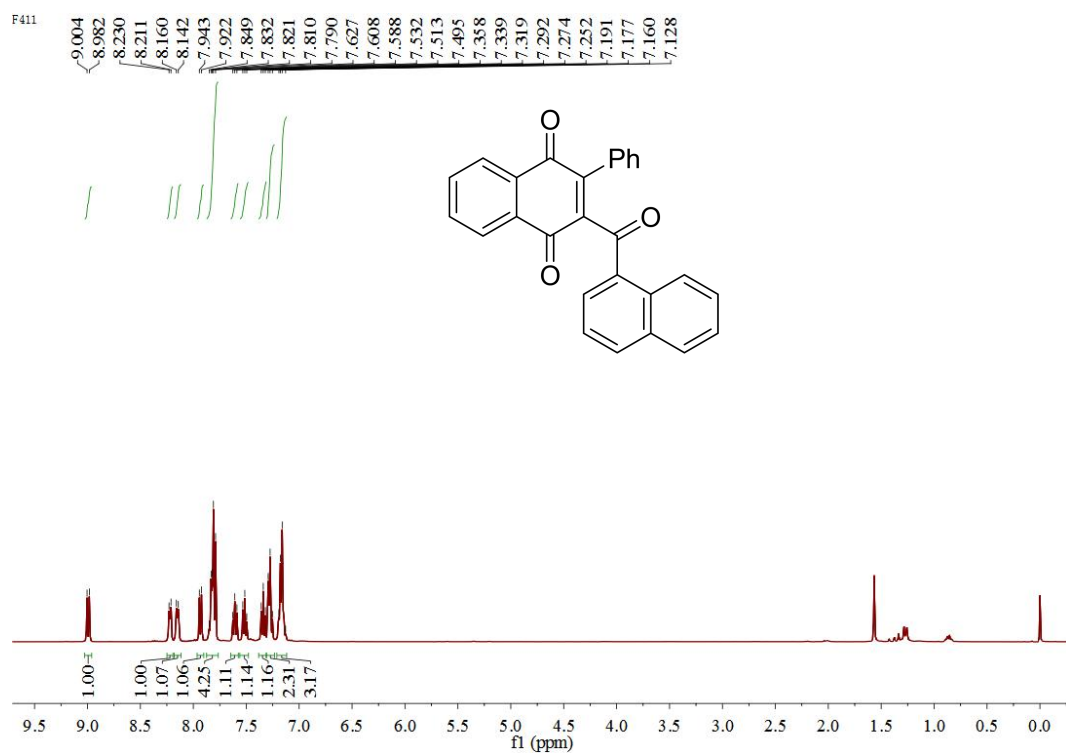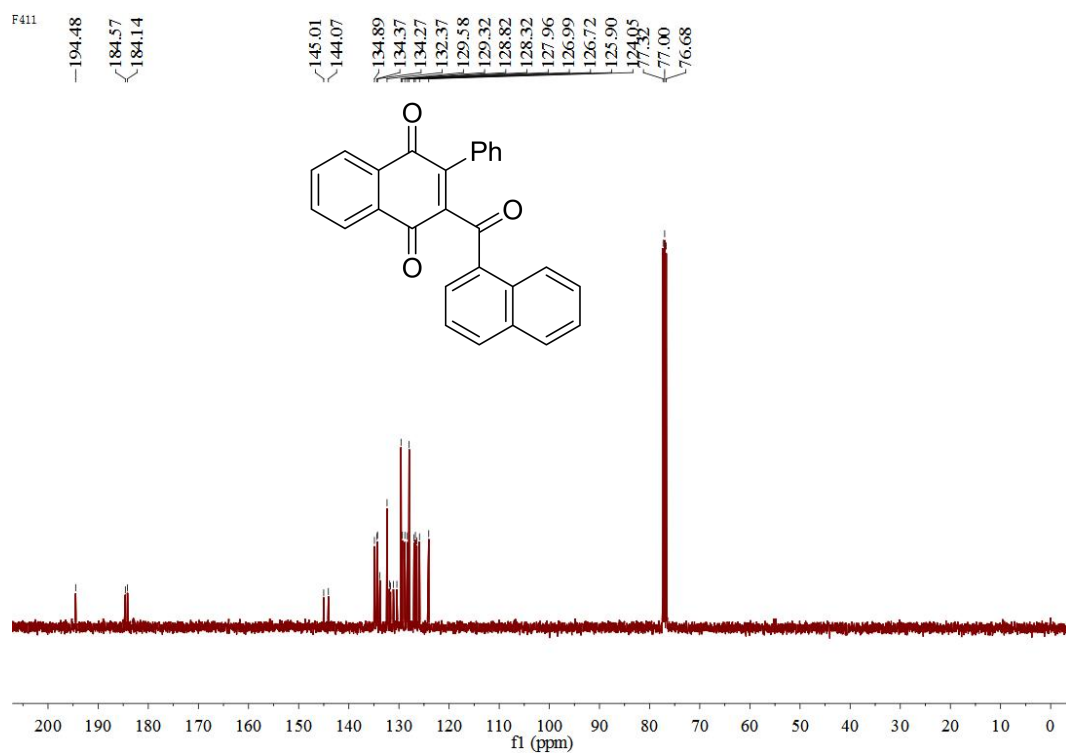

# <sup>1</sup>H NMR and <sup>13</sup>C NMR of 4ad

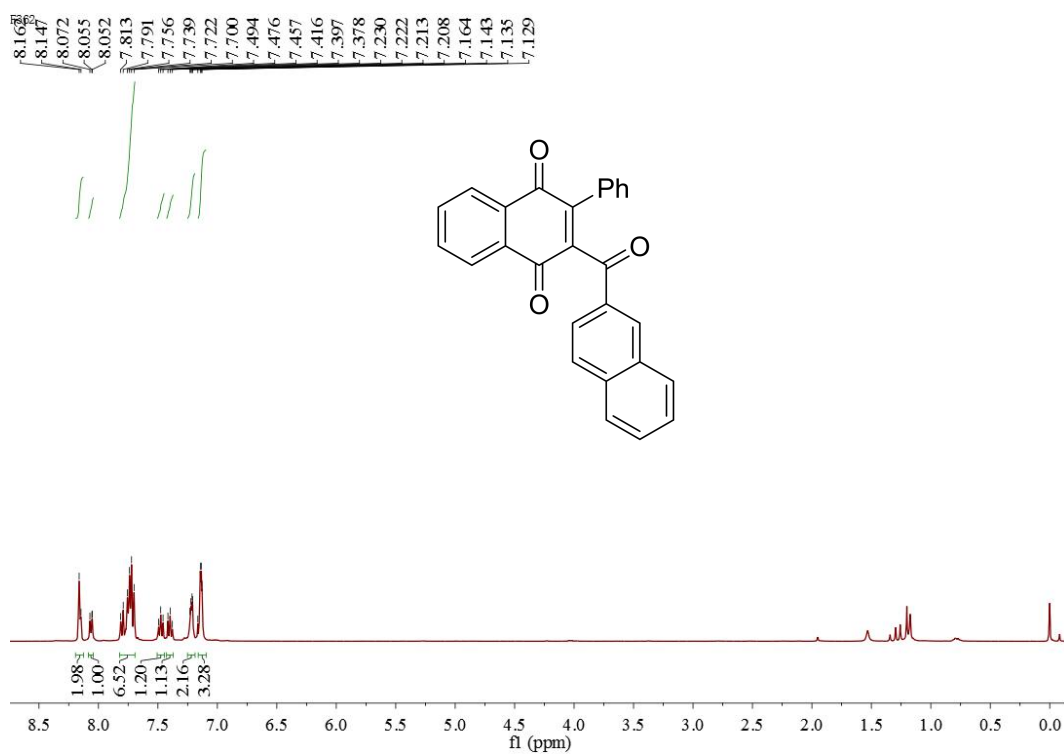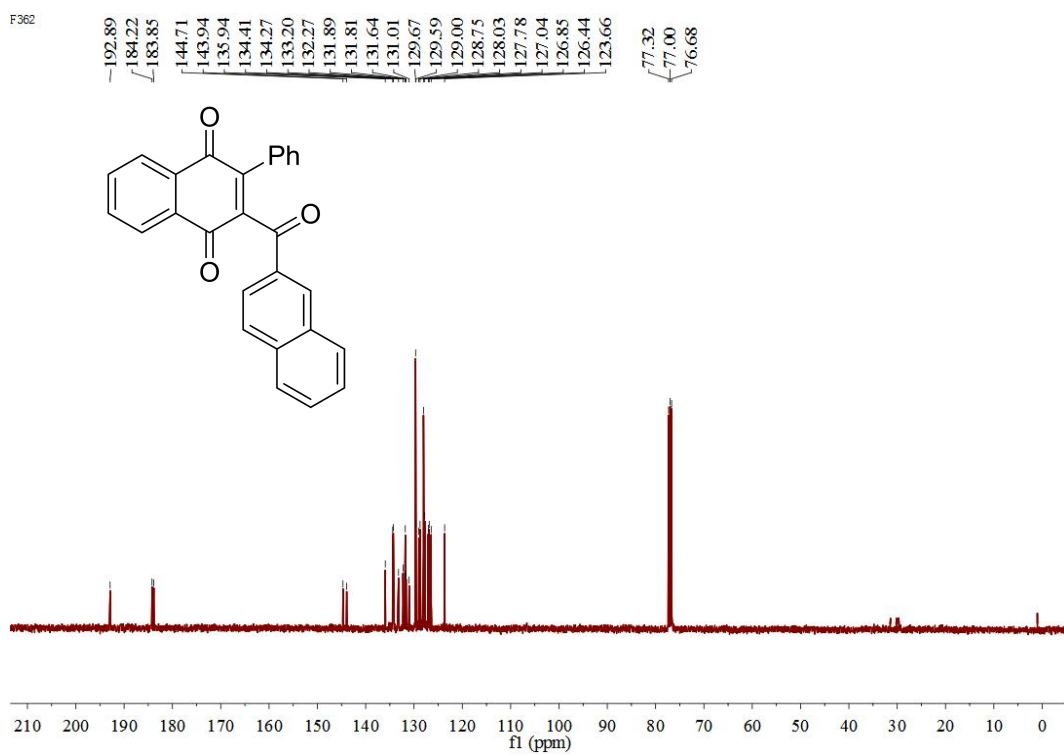

Supplement: d3cc03753c1.pdf [file d3cc03753c1.pdf]
